# Supplementary material
Source: HighWire-hosted journal article supplement (http://www.cmajopen.ca/highwire/filestream/87987/field_highwire_adjunct_files/1/open-2021-0254-original-submission.pdf)
Supplement: open-2021-0254-original-submission.pdf [file open-2021-0254-original-submission.pdf]

# The efficiency and effectiveness of breast cancer diagnosis in Ontario: a case for reprioritizing symptomatic patients

Steven Habbous, PhD<sup>1</sup>, Esha Homenauth, MSc<sup>1</sup>, Andriana Barisic, MSc<sup>1</sup>, Sharmilaa Kandasamy, BSc<sup>1</sup>, Vicky Majpruz, MA<sup>1</sup>, Katharina Forster, PhD, MD<sup>1</sup>, Marta Yurcan, MHSc<sup>1</sup>, Anna M. Chiarelli, PhD<sup>1,2</sup>, Patti Groome, PhD<sup>3</sup>, Claire Holloway, PhD, MD<sup>1,4</sup>, Andrea Eisen, MD<sup>1,5</sup>

<sup>1</sup> Ontario Health (Cancer Care Ontario), Toronto, Ontario, Canada, M5G 2L3.

<sup>2</sup> Dalla Lana School of Public Health, University of Toronto, Toronto, Ontario, Canada, M5T 3M7

<sup>3</sup> Institute for Clinical Evaluative Sciences at Queen's University, Kingston Ontario, Canada, K7L 3L4.

<sup>4</sup> Department of Surgery, University of Toronto, Ontario, Canada, M5T1P5

<sup>5</sup> Department of Medical Oncology, Sunnybrook Health Sciences Centre, Toronto Ontario, Canada, M4Y 1H1.

**\*Corresponding author:**

Steven Habbous, PhD  
Ontario Health (Cancer Care Ontario)  
525 University Ave  
Toronto, ON, Canada  
M5G2L3  
[Steven.habbous@ontariohealth.ca](mailto:Steven.habbous@ontariohealth.ca)

**\*Funding:** No specific funding sources were used

**\*Conflicts:** All co-authors have no conflicts of interest to disclose.

**Words:** 2955

**Tables:** 5      **Figures:** 3

**Version date:** August 28, 2021

**Keywords:** Breast cancer; diagnosis; efficiency; wait-times; screening; symptomatic

**Abstract (words = 250)**

**Introduction:** Most breast cancer patients in Ontario are diagnosed through the Ontario Breast Screening Program (OBSP) and its assessment sites following an abnormal screen or follow-up of symptoms by patients' primary care providers. During the diagnostic evaluation, patients may be referred to an OBSP-affiliated Breast Assessment Site (O-BAS), which includes patient navigators, personnel, and equipment to facilitate a timely and thorough diagnostic evaluation. Unlike OBSP-screened patients, there is no provincial oversight for the diagnostic evaluation of symptomatic patients.

**Methods:** Patients diagnosed with breast cancer from 2013-2017 were identified from the Ontario Cancer Registry. By linking to other administrative databases, we explored the association of the route to diagnosis (screened or symptomatic) on use of O-BAS, wait times until diagnosis or treatment, healthcare utilization patterns, and overall survival for patients with breast cancer.

**Results:** 42,598/51,460 (83%) of breast cancer patients were diagnosed at an O-BAS. OBSP-screen-detected patients were more likely than symptomatic patients to be diagnosed at an O-BAS [adjusted odds ratio 1.68 (1.57-1.80)]. O-BAS patients had significantly better overall survival than non-O-BAS patients [adjusted hazard ratio 0.73 (0.66-0.80)]. OBSP-screen-detected patients were diagnosed 1 month quicker than symptomatic patients, but diagnosis at an O-BAS did not affect wait-times.

**Conclusion:** The efficiency and effectiveness of the OBSP has created a high-quality mechanism for screen-eligible patients to receive timely breast cancer diagnosis and optimal care. Our findings suggest that individuals with signs and symptoms of breast cancer would benefit from the same diagnostic assessment processes and standards employed by the organized screening program.

## Introduction

Breast cancer is the second most common malignancy, accounting for 12% of all cancers worldwide.<sup>1,2</sup> Thus, inefficiencies in care affects many patients and greatly impacts healthcare resources. An international collaborative effort found that patients in Ontario (Canada's largest province) had prolonged wait times for cancer diagnosis compared to select countries.<sup>3,4</sup> To address this variation, several jurisdictions in Canada and internationally have implemented initiatives to improve the route to cancer diagnosis.<sup>5</sup>

In an effort to improve the timeliness, efficiency, and outcomes of patients undergoing assessment for breast cancer, Ontario Health (Cancer Care Ontario) has designated facilities as Breast Assessment Sites.<sup>6-8</sup> To qualify as a Breast Assessment Site, facilities are required to have a patient navigation system that coordinates referrals through a defined clinical pathway and have access to diagnostic imaging, image-guided biopsies, and pathology and surgical services.<sup>6-10</sup> Although these sites are affiliated with the Ontario Breast Screening Program (OBSP), hereby referred to as O-BAS, symptomatic women may also be referred to an O-BAS.

Patients diagnosed with breast cancer typically first engage the healthcare system through their primary care provider with symptomatic presentation or through screening within the OBSP.<sup>11,12</sup> This initial point of contact is a critical point of divergence for women entering the cancer system. Due to the relationship between the OBSP and O-BAS, we expect fewer symptomatic women to be diagnosed in an O-BAS. Moreover, we expect the diagnostic process to be less efficient for symptomatic women because the patients' general practitioner (GP) coordinates the diagnostic work-up. Regardless of whether a patient is symptomatic or screened, the diagnostic assessment should be efficient and accurate, following best practices and minimizing unnecessary tests.<sup>13</sup> The time until diagnosis and treatment should also be minimized to reduce patient anxiety during this stressful time.<sup>14</sup>

1  
2  
3 In the present study, we explored the association of the route to diagnosis (screened or  
4 symptomatic) on utilization of O-BAS, wait times until diagnosis or treatment, healthcare  
5 utilization, and overall survival for patients with breast cancer.  
6  
7  
8  
9

## 10 11 12 **Methods**

### 13 14 15 **Cohort ascertainment**

16  
17  
18 Adults (age 18+) with an incident invasive breast cancer diagnosed in Ontario between January  
19 1, 2013 and December 31, 2017 (ICD-O-3 C50) were identified using the Ontario Cancer  
20 Registry (OCR). We included patients who had a valid Ontario health insurance number, an  
21 Ontario postal code, and accessed the Ontario Health Insurance Program (OHIP) within 1 year  
22 of the diagnosis date. We omitted patients who had a death date before or on the diagnosis  
23 date, were diagnosed by autopsy, or had missing age or sex.  
24  
25  
26  
27  
28  
29  
30

### 31 32 **Screened versus symptomatic**

33  
34 Data are collected for all OBSP-screened women through the Integrated Client Management  
35 System (ICMS) (**Supplementary Figure S1**). Patients may still be screened outside the  
36 auspices of the OBSP, but the patients' GP coordinates the assessment. Patients were  
37 classified as "GP-screened" if they had a screening mammogram <12 months prior to diagnosis  
38 and were not previously classified as OBSP-screened. The remaining patients were classified  
39 as "symptomatic". GP-screened and symptomatic patients may have been screened >12  
40 months prior through the OBSP, but this earlier screen did not lead to the present breast cancer  
41 diagnosis.  
42  
43  
44  
45  
46  
47  
48  
49  
50

### 51 52 **Diagnosis at an O-BAS**

## Optimizing care for symptomatic breast cancer patients

1  
2  
3 At the time of analysis, there were 72 O-BAS located throughout the province (**Supplementary**  
4 **Table S1**). Patients may be assessed at an O-BAS if symptomatic or screened, but the ICMS  
5 only collects data on OBSP-screened women. To determine whether GP-screened and  
6 symptomatic patients were assessed at an O-BAS, we used the location of the patients' biopsy  
7 from billing data, supplemented with the location of the patients' surgery (**Supplementary Table**  
8 **S1**).<sup>12,15</sup>

**Healthcare utilization**

16  
17  
18  
19 We explored the frequency and timing of diagnostic tests and consultations or visits with  
20 healthcare providers 6 months before diagnosis until the date of first treatment. We searched  
21 the OHIP (physician billing) database in addition to the hospital-based databases Discharge  
22 Abstract Database (DAD) and the National Ambulatory Care Reporting System (NACRS).  
23 Administrative codes are reported in **Supplementary Tables S2-3**.

**Diagnostic interval**

30  
31  
32  
33 We defined the diagnostic interval as the time from suspicion of breast cancer until diagnosis  
34 from the OCR. For screen-detected cancers, the suspicion date corresponds to the screening  
35 mammogram identified from ICMS (OBSP-screened) or OHIP records (GP-screened patients).  
36 For symptomatic patients, we searched OHIP, DAD, and NACRS for any relevant diagnostic  
37 procedures, consults, visits, and primary care referrals occurring within pre-specified look-back  
38 periods using methodology published elsewhere (**Supplementary Tables S4**).<sup>16,17</sup>

**Pre-treatment interval**

46  
47  
48  
49 We defined the pre-treatment interval as the time from diagnosis until treatment started using  
50 the earliest of breast resection (Supplementary Table S2), anti-neoplastic systemic therapy, or  
51 chest radiation. Antineoplastic therapy was identified from the Activity Level Reporting (ALR)

1  
2  
3 database, the New Drug Funding Program database, or the Ontario Drug Benefits database,  
4  
5 DAD, or NACRS. Radiation was identified from ALR.  
6  
7

### 8 **Other covariates**

9  
10 We used the Collaborative Staging database to identify overall cancer stage (AJCC 7<sup>th</sup> edition),  
11  
12 and the tumors' estrogen receptor (ER), progesterone receptor (PR), and human epidermal  
13  
14 growth factor receptor-2 (HER2) status. We used DAD and NACRS to estimate comorbidity  
15  
16 using the Charlson Comorbidity Index with a window of 3 years before the diagnosis date,  
17  
18 excluding cancer (**Supplementary Figure S2**).<sup>18,19</sup> Sociodemographic characteristics were  
19  
20 derived from the Census using the Postal Code Conversion File+ (version 7B for income and  
21  
22 rurality; version 6C for immigrant density). Health insurance numbers were used for linkage  
23  
24 across databases. All databases employed are used for continuous system performance  
25  
26 monitoring and undergo routine quality checks.  
27  
28  
29

### 30 **Statistical methods**

31  
32 We present means (standard deviation, SD), medians (interquartile range, IQR), and  
33  
34 proportions, where appropriate. We used bivariate or multinomial logistic regression to compare  
35  
36 factors between groups, reporting odds ratios (OR) and 95% confidence intervals (CI). We used  
37  
38 linear regression to explore factors associated with wait-times, reporting beta coefficients and  
39  
40 95% CI, which represent the change in wait times (in days) per unit change in the covariate.  
41  
42 Absence of heteroscedasticity was confirmed using the `autoreg` procedure. We used Cox  
43  
44 proportional hazards regression to explore factors associated with all-cause mortality, reporting  
45  
46 hazard ratios (HR) and 95% CI. Follow-up started at the time of diagnosis and ended at death or  
47  
48 the last known healthcare encounter occurring on or before December 31, 2019. For OBSP-  
49  
50 screen-detected cancer patients, lead-time bias was corrected by subtracting  $[1 - \exp(-\lambda t)] / \lambda$  from  
51  
52 the survival time, where  $\lambda$  is the inverse of the mean sojourn time (2 years) and  $t$  is the survival  
53  
54  
55  
56  
57  
58  
59  
60

## Optimizing care for symptomatic breast cancer patients

1  
2  
3 time.<sup>20</sup> The date of death was assigned using the OCR, supplemented with the Registered  
4  
5 Persons Database. Unless otherwise stated, all multivariable models were adjusted for O-BAS  
6  
7 status, screened/symptomatic presentation, age, sex, neighbourhood income quintile,  
8  
9 neighbourhood immigrant density, rurality, Charlson comorbidity index, prior breast/non-breast  
10  
11 cancer history, cancer laterality, cancer stage, hormone receptor profile, topography, and  
12  
13 geography (Local Health Integration Network, LHIN). Proportionality was confirmed by visual  
14  
15 inspection of Kaplan-Meier plots, log(-log) survival plots, and Loess-smoothed Schoenfeld  
16  
17 residuals versus time. All analyses were performed using SAS version 9.4 (Cary, NC, SAS  
18  
19 Institute Inc.). Statistical tests were two-sided and evaluated at a 5% significance level. All cells  
20  
21 <6 were suppressed. Ethics approval was not required.  
22  
23  
24  
25  
26  
27

## 28 Results

29  
30  
31 A total 51,460 breast cancer patients were identified (**Supplementary Figure S3**). The mean  
32  
33 age at diagnosis was 63 (SD 13.7) years, 86% had no comorbidity, 3,845 (7%) had a prior  
34  
35 breast cancer and 42,598 (83%) were diagnosed in an O-BAS (**Table 1**). A total 28,107 (55%)  
36  
37 were symptomatic, 13,615 (27%) were OBSP-screened, and 9,738 (19%) were GP-screened.  
38  
39

### 40 O-BAS vs. non-O-BAS

41  
42  
43 After adjustment, O-BAS patients were more likely to be younger, have no comorbidities, live  
44  
45 closer to an O-BAS, and live in a higher-income urban neighbourhood ( $p < 0.001$  for all) (**Table**  
46  
47 **1**). O-BAS patients had lower-stage disease ( $p < 0.0001$ ), known hormone receptor status  
48  
49 ( $p < 0.0001$ ), a greater risk of prior breast cancer ( $p = 0.0005$ ), and more likely to have had an  
50  
51 OBSP-screened cancer [OR 1.68 (1.57-1.80)] or GP-screen-detected cancer [OR 1.31 (1.23-  
52  
53 1.41)] than symptomatic.  
54  
55  
56  
57  
58  
59  
60

### OBSP-screened, GP-screened, versus symptomatic

The proportion of patients who were OBSP-screened increased from 23% in 2013 to 29% in 2017 with correspondingly fewer patients presenting with symptoms (**Figure 1**). Symptomatic patients were more likely to reside in a lower-income neighbourhood ( $p < 0.0001$ ), have greater comorbidity ( $p < 0.0001$ ), and have advanced-stage breast cancer than screened patients: 30% of symptomatic patients had stage 1 compared with 47% of GP-screened and 64% of OBSP-screened patients (**Table 2**). Symptomatic patients were more likely to have biologically more aggressive disease: 18% had ER- tumors (versus 11% for OBSP-screened) and 18% had HER2+ tumors (versus 12% for OBSP-screened).

### The diagnostic interval

The diagnostic interval was a median 35 (IQR 19, 82) days. Diagnosis at an O-BAS did not reduce the diagnostic interval [beta -2.0 (-3.7, -0.4) days] (**Table 3**) or shorter sub-intervals (e.g. time from suspicion to first image test) (**Supplementary Table S5**). In contrast, compared with stage 1, the diagnostic interval was 10, 12, 21, and 10 days shorter for patients with stage 2, 3, 4, and unknown stage, respectively ( $p < 0.0001$ ). Patients with bilateral breast cancer had a shorter diagnostic interval [beta -10.3 (-17.0, -3.6) days], as did males [beta -13.0 (-19.7, -6.3)]. Compared with symptomatic patients, the diagnostic interval was 25 days shorter [beta -24.8 (-26.3, -23.4)] for OBSP-screened patients and 5 days longer [beta 4.9 (3.3, 6.4) days] for GP-screened patients. No other demographic and clinical factors were meaningfully associated with the length of the diagnostic interval.

### The pre-treatment interval



## Optimizing care for symptomatic breast cancer patients

The first intervention provided was surgery for 40,652 (79%) and systemic therapy for 9,296 (18%) of patients. The pre-treatment interval was a median 34 (IQR 23, 47) days. After adjustment, there were no factors associated with a meaningful delay (**Table 3**).

**Healthcare utilization**

Frequency: O-BAS patients were more likely to have received various diagnostic tests before treatment than non-O-BAS patients, including a diagnostic mammogram (91% versus 78%), screening mammogram (44% versus 30%), breast biopsy (97% versus 85%), breast ultrasound (94% versus 82%), and breast MRI (23% versus 13%) (**Table 4**). However, O-BAS patients were less likely than non-O-BAS patients to have had an abdominal/thoracic CT scan (25% versus 38%) and a chest x-ray (39% versus 49%). O-BAS patients were more likely than non-O-BAS patients to have a consultation with a general surgeon or general thoracic surgeon (97% versus 87%), but were less likely than non-O-BAS patients to visit their GP (40% versus 49%), have a consultation with an internist (18% versus 24%), or medical oncologist (15% versus 26%).

Timing: O-BAS patients had a consultation or visit with a general surgeon or general thoracic surgeon earlier than non-O-BAS patients (median 8 days versus 1 day before diagnosis) (**Table 4**). The time from diagnosis until consultation with a medical oncologist or radiation oncologist was longer, with a median 20 (11, 32) days and 21 (10, 34) days, respectively.

**Overall survival**

Patients were followed a mean 42 (SD 21.5) months after diagnosis. After adjustment, patients diagnosed at an O-BAS had better overall survival than non-O-BAS patients [HR 0.73 (0.69-0.78)] (**Table 5**). Overall survival was also better for patients who were either OBSP-screened [HR 0.73 (0.66-0.80)] or GP-screened [HR 0.67 (0.62-0.72)] versus symptomatic. Without

1  
2  
3 adjustment, O-BAS had a larger impact on survival among symptomatic patients [HR 0.43  
4 (0.41-0.45),  $p < 0.0001$ ], and GP-screened patients [HR 0.48 (0.41-0.56),  $p < 0.0001$ ] than OBSP-  
5 screened patients [HR 0.69 (0.55-0.88),  $p = 0.002$ ] ( $p$ -interaction = 0.0003) (**Figure 2**). In the  
6  
7 adjusted model, the difference of the effect of O-BAS on overall survival was similar across  
8  
9 patient types ( $p$ -interaction=0.80): HR 0.73 (0.69-0.78),  $p < 0.0001$  among symptomatic, HR 0.73  
10  
11 (0.62-0.986),  $p = 0.0002$  among GP-screened, and HR 0.72 (0.56-0.92),  $p = 0.008$  among OBSP-  
12  
13 screened. Patients also had worse overall survival if they were older, lived in a lower-income  
14  
15 neighborhood, had greater comorbidity or prior cancer history, more advanced stage, or triple-  
16  
17 negative disease ( $p < 0.0001$  for all) (**Table 5**).  
18  
19  
20  
21  
22  
23  
24

## 25 Discussion

26  
27  
28 In this study, we found that patients screened in an organized program had a faster time until  
29  
30 diagnosis and were more likely to be referred to an O-BAS than symptomatic patients. We also  
31  
32 observed that attendance at an O-BAS was associated with improved overall survival.  
33  
34

35  
36 As of 1998, the OBSP implemented a process where screened women can be directly  
37  
38 referred for diagnostic follow-up (at an O-BAS or other assessment site) by the OBSP screening  
39  
40 site responsible for that patient's work-up.<sup>9</sup> The main focus of this system-level change was to  
41  
42 improve the coordination and quality of care for women screened through the OBSP. Our  
43  
44 results demonstrate the success of this program, but similar improvements are needed for  
45  
46 symptomatic patients for several reasons (**Figure 3**).<sup>21</sup> First, symptomatic patients exhibit  
47  
48 features associated with worse prognosis, including older age at diagnosis, more advanced  
49  
50 stage, and more biologically aggressive tumors.<sup>22-26</sup> O-BAS are high-volume centres that are  
51  
52 equipped to manage complex patients and efficiently render a diagnosis.<sup>9,27</sup> Despite this,  
53  
54 symptomatic patients were less likely to be diagnosed at an O-BAS (**Figure 3, a-c**). Second, a  
55  
56  
57  
58  
59  
60

## Optimizing care for symptomatic breast cancer patients

1  
2  
3 shorter time until treatment (diagnostic plus pre-treatment intervals) may be important for a  
4 subset of patient with more aggressive tumors.<sup>28</sup> Patients with fast-growing tumors are less  
5 likely to be screen-detected due to length time bias, so any effect of wait times on mortality is  
6 expected to be more impactful for symptomatic patients, yet symptomatic patients had a longer  
7 time until diagnosis (**Figure 3, d-e**).<sup>29,30</sup> Third, anxiety during the diagnostic interval is high, and  
8 may be higher for patients with symptoms than those without.<sup>14,31,32</sup> Thus, symptomatic patients  
9 may again derive greater benefit from a shorter diagnostic interval. In addition, with  
10 comprehensive data collection for the OBSP-screened population, patients can learn about their  
11 risk of having cancer given an abnormal screen. There is no parallel for symptomatic patients  
12 who, arguably, may need this type of information more urgently than asymptomatic women do  
13 (**Figure 3, e-g**).<sup>33,34</sup>

14  
15  
16  
17  
18  
19  
20  
21  
22  
23  
24  
25  
26  
27 The OBSP requires that O-BAS adhere to requirements outlined in its standard  
28 operating procedures.<sup>17,35</sup> Additionally, O-BAS are required to develop mechanisms for ongoing  
29 evaluation and quality improvement, and to implement processes to notify the referring  
30 physician of abnormal test results, recommendations for biopsy, and the diagnosis. However,  
31 approximately 74% of all breast cancer cases are diagnosed outside the auspices of the  
32 organized screening program and are therefore not subject to those same standards, reporting,  
33 and performance management requirements. Funneling symptomatic patients through an  
34 organized system is therefore expected to improve clinical and patient-reported outcomes, and  
35 provide data necessary to inform quality improvement. We suspect the existing O-BAS likely  
36 have the capacity to evaluate these patients because by 2017, 79% of all symptomatic breast  
37 cancer patients in the province were diagnosed at an O-BAS (this estimate has increased since  
38 the time of writing as more centres have become O-BAS). While it remains unknown how many  
39 symptomatic patients without breast cancer are assessed at an O-BAS, we suspect that O-BAS  
40 are also ruling-out cancer in many of these patients because: 1) the likelihood of a cancer

1  
2  
3 diagnosis is higher if symptoms are present; 2) the need for a diagnostic biopsy is more likely  
4 for symptomatic patients; and 3) O-BAS are more likely to have the ability to perform a biopsy  
5 than non-O-BAS.<sup>11,36</sup> It remains possible that increased referrals to O-BAS will result in capacity  
6 constraints and prolonged wait-times. This should be considered when designing system-level  
7 changes to the diagnostic process for symptomatic women. However, a more standardized  
8 diagnostic assessment pathway may also reduce repeated imaging and unnecessary testing,  
9 which is also expected to reduce costs.<sup>37</sup> A 2018 environmental scan of national and regional  
10 cancer diagnostic improvement initiatives described cost savings, but formal cost effectiveness  
11 analyses were not available.<sup>5</sup> Such analyses should be considered prior to full implementation  
12 of O-BAS.  
13  
14  
15  
16  
17  
18  
19  
20  
21  
22  
23  
24

25 One limitation of this study is the risk of misclassification of GP-screened cancers (e.g.  
26 some may have been symptomatic) and symptomatic cancers (e.g. some may have been  
27 incidental findings). However, the demographic, clinical, and tumor characteristics of the GP-  
28 screened group was in-between that of the OBSP-screened and symptomatic groups,  
29 suggesting that this misclassification is small. Further, the rate of incidental breast cancer  
30 detection is believed to be low.<sup>38–40</sup> Second, the gold standard definition of O-BAS is imperfect:  
31 it reflects the institution that renders the diagnosis, which may differ from the institution  
32 conducting the remainder of the diagnostic work-up. Also, there are some institutions that  
33 function like an O-BAS (e.g. have all the necessary equipment and personnel), but they do not  
34 have patient navigation or a funding agreement with the OBSP. These centres were classified  
35 as non-O-BAS, despite having some O-BAS features. Third, patients with prior breast cancers  
36 had a significantly longer diagnostic interval than those who did not. However, because the  
37 suspicion algorithm was developed in a cohort of first-ever breast cancer patients, it may not be  
38 valid in this subgroup of patients.<sup>16,17</sup> Nevertheless, findings from a recent systematic review  
39 recommend that patients with a prior history of breast cancer be included in screening programs  
40  
41  
42  
43  
44  
45  
46  
47  
48  
49  
50  
51  
52  
53  
54  
55  
56  
57  
58  
59  
60

## Optimizing care for symptomatic breast cancer patients

(even if not high-risk), a conclusion that is supported by our findings.<sup>41</sup> Fourth, information on sociodemographic factors were limited to neighbourhood-level classification rather than individual-level, which may result in misclassification on estimates of income and immigrant density. Fifth, our results may not generalize to certain patient groups, like males. Further, our results may not generalize to patients who are diagnosed with ductal carcinoma *in situ*, which was out-of-scope in the present analysis because it is generally asymptomatic. The small number of patients classified as stage 0 are likely misclassified. Finally, our results may not generalize to other jurisdictions that do not have organized screening programs or have a designated referral stream for symptomatic women. While other provinces in Canada have organized screening programs, we are unaware of any provincial-level assessment programs designated for symptomatic women.<sup>37,42,43</sup> Reviews of the literature related to symptomatic presentation often focus only on wait-times as a measure of performance.<sup>44,45</sup>

Our findings suggest that all individuals with signs and symptoms of breast cancer would benefit from organized, high-quality diagnostic assessment processes and standards like those employed by the OBSP. There is a clear need to extend provincial oversight and performance monitoring for all individuals undergoing breast assessment for a possible cancer diagnosis.

## Acknowledgements

We thank Julia Gao, Gabriela Espino-Hernandez, and Natasha Gray (Cancer Screening, Ontario Health) for their expertise and guidance to navigate the ICMS data and for their comments on the study.

## Data Source Acknowledgements

Parts of this material are based on data and information compiled and provided by the Canadian Institute for Health Information (CIHI). However, the analyses, conclusions, opinions and statements expressed herein are those of the author, and not necessarily those of CIHI.

We acknowledge the support of the Ontario Ministry of Health. The views expressed in this report are those of the authors and do not necessarily reflect those of Ontario or the Ministry.

We acknowledge the Ministry of Government and Consumer Services (MCGS) as the original source of death data. The views expressed in this report are those of the authors and do not necessarily reflect those of the MCGS.

This study was supported by the Institute for Clinical Evaluative Sciences (ICES), which is funded by an annual grant from the Ontario Ministry of Health and Long-Term Care (MOHLTC). The opinions, results and conclusions reported in this paper are those of the authors and are independent from the funding sources. No endorsement by ICES or the Ontario MOHLTC is intended or should be inferred.

**Data availability statement:** Ontario Health is prohibited from making the data used in this research publicly accessible if it includes potentially identifiable personal health information and/or personal information as defined in Ontario law, specifically the Personal Health Information Protection Act (PHIPA) and the Freedom of Information and Protection of Privacy Act (FIPPA). Upon request, data de-identified to a level suitable for public release may be provided.

## References

1. Bray F, Ferlay J, Soerjomataram I, Siegel RL, Torre LA, Jemal A. Global cancer statistics 2018: GLOBOCAN estimates of incidence and mortality worldwide for 36 cancers in 185 countries. *CA Cancer J Clin.* 2018;68(6):394-424. doi:10.3322/caac.21492
2. Ontario Cancer Statistics 2020. <https://www.cancercareontario.ca/en/statistical-reports/ontario-cancer-statistics-2020/ch-1-estimated-current-cancer-incidence>. Published 2020. Accessed November 11, 2020.
3. Menon U, Vedsted P, Zalounina Falborg A, et al. Time intervals and routes to diagnosis for lung cancer in 10 jurisdictions: cross-sectional study findings from the International Cancer Benchmarking Partnership (ICBP). *BMJ Open.* 2019;9(11):e025895. doi:10.1136/bmjopen-2018-025895
4. Weller D, Menon U, Falborg AZ, et al. Diagnostic routes and time intervals for patients with colorectal cancer in 10 international jurisdictions; findings from a cross-sectional study from the International Cancer Benchmarking Partnership (ICBP). *BMJ Open.* 2018;8(11):e023870. doi:10.1136/BMJOPEN-2018-023870
5. Pollock M, Craig R, Chojecki D, Guo B. *Initiatives to Accelerate the Diagnostic Phase of Cancer Care: An Environmental Scan.*; 2018. <https://www.ihe.ca/publications/initiatives-to-accelerate-the-diagnostic-phase-of-cancer-care-an-environmental-scan>. Accessed August 28, 2021.
6. Hendrick RE, Helvie MA. Mammography Screening: A New Estimate of Number Needed to Screen to Prevent One Breast Cancer Death. *Am J Roentgenol.* 2012;198(3):723-728. doi:10.2214/AJR.11.7146
7. Hendrick RE, Helvie MA. United States Preventive Services Task Force Screening Mammography Recommendations: Science Ignored. *Am J Roentgenol.* 2011;196(2):W112-W116. doi:10.2214/AJR.10.5609

## Optimizing care for symptomatic breast cancer patients

- 1  
2  
3 8. Webber C, Whitehead M, Eisen A, Holloway CM. Breast cancer diagnosis and treatment  
4 wait times in specialized diagnostic units compared with usual care: a population-based  
5 study. *Curr Oncol*. 2020;27(4):e377-e385. doi:https://doi.org/10.3747/co.27.6115  
6
- 7 9. Chiarelli AM, Muradali D, Blackmore KM, et al. Evaluating wait times from screening to  
8 breast cancer diagnosis among women undergoing organised assessment vs usual care.  
9 *Br J Cancer*. 2017;116(10):1254-1263. doi:10.1038/bjc.2017.87  
10
- 11 10. Quan ML, Shumak RS, Majpruz V, Holloway CMD, O'Malley FP, Chiarelli AM. Improving  
12 work-up of the abnormal mammogram through organized assessment: results from the  
13 ontario breast screening program. *J Oncol Pract*. 2012;8(2):107-112.  
14 doi:10.1200/JOP.2011.000413  
15
- 16 11. Koo MM, von Wagner C, Abel GA, McPhail S, Rubin GP, Lyratzopoulos G. Typical and  
17 atypical presenting symptoms of breast cancer and their associations with diagnostic  
18 intervals: Evidence from a national audit of cancer diagnosis. *Cancer Epidemiol*.  
19 2017;48:140-146. doi:10.1016/j.canep.2017.04.010  
20
- 21 12. Jiang L, Gilbert J, Langley H, Moineddin R, Groome PA. Breast cancer detection method,  
22 diagnostic interval and use of specialized diagnostic assessment units across Ontario,  
23 Canada. *Heal Promot Chronic Dis Prev Can*. 2018;38(10):358-367.  
24 doi:10.24095/hpcdp.38.10.02  
25
- 26 13. Breast Cancer Pathway Map | Cancer Care Ontario.  
27 <https://www.cancercareontario.ca/en/pathwaymap/breast-cancer-pathway-map>.  
28 Accessed August 31, 2020.
- 29 14. Montgomery M, McCrone SH. Psychological distress associated with the diagnostic  
30 phase for suspected breast cancer: systematic review. *J Adv Nurs*. 2010;66(11):2372-  
31 2390. doi:10.1111/j.1365-2648.2010.05439.x  
32
- 33 15. Jiang L, Gilbert J, Langley H, Moineddin R, Groome PA. Is being diagnosed at a  
34 dedicated breast assessment unit associated with a reduction in the time to diagnosis for  
35 symptomatic breast cancer patients? *Eur J Cancer Care (Engl)*. 2018;27(4):e12864.  
36 doi:10.1111/ecc.12864  
37
- 38 16. Groome PA, Webber C, Whitehead M, et al. Determining the Cancer Diagnostic Interval  
39 Using Administrative Health Care Data in a Breast Cancer Cohort. *JCO Clin cancer*  
40 *informatics*. 2019;3:1-10. doi:10.1200/CCI.18.00131  
41
- 42 17. Jiang L, Gilbert J, Langley H, Moineddin R, Groome PA. Effect of specialized diagnostic  
43 assessment units on the time to diagnosis in screen-detected breast cancer patients. *Br J*  
44 *Cancer*. 2015;112(11):1744-1750. doi:10.1038/bjc.2015.147  
45
- 46 18. Kilgore ML, Smith W, Curtis JR, et al. Evaluating Comorbidity Scores Based on Health  
47 Service Expenditures. *Medicare Medicaid Res Rev*. 2012;2(3).  
48 doi:10.5600/MMRR.002.03.A05
- 49 19. TA D, N C, DC C, JM Y. Look back for the Charlson Index did not improve risk  
50 adjustment of cancer surgical outcomes. *J Clin Epidemiol*. 2015;68(4):379-386.  
51 doi:10.1016/J.JCLINEPI.2014.12.002  
52
- 53 20. SW D, ID N, M W, et al. Correcting for lead time and length bias in estimating the effect of  
54 screen detection on cancer survival. *Am J Epidemiol*. 2008;168(1):98-104.  
55 doi:10.1093/AJE/KWN120  
56  
57  
58  
59  
60

- 1
  - 2
  - 3
  - 4
  - 5
  - 6
  - 7
  - 8
  - 9
  - 10
  - 11
  - 12
  - 13
  - 14
  - 15
  - 16
  - 17
  - 18
  - 19
  - 20
  - 21
  - 22
  - 23
  - 24
  - 25
  - 26
  - 27
  - 28
  - 29
  - 30
  - 31
  - 32
  - 33
  - 34
  - 35
  - 36
  - 37
  - 38
  - 39
  - 40
  - 41
  - 42
  - 43
  - 44
  - 45
  - 46
  - 47
  - 48
  - 49
  - 50
  - 51
  - 52
  - 53
  - 54
  - 55
  - 56
  - 57
  - 58
  - 59
  - 60
21. Raine R, Or Z, Prady S, Bevan G. Evaluating health-care equity. 2016. doi:10.3310/HSDR04160-69
22. Esserman LJ, Shieh Y, Rutgers EJT, et al. Impact of mammographic screening on the detection of good and poor prognosis breast cancers. *Breast Cancer Res Treat.* 2011;130(3):725-734. doi:10.1007/s10549-011-1748-z
23. Drukker CA, Schmidt MK, Rutgers EJT, et al. Mammographic screening detects low-risk tumor biology breast cancers. *Breast Cancer Res Treat.* 2014;144(1):103-111. doi:10.1007/s10549-013-2830-5
24. Pálka I, Kelemen G, Ormándi K, et al. Tumor characteristics in screen-detected and symptomatic breast cancers. *Pathol Oncol Res.* 2008;14(2):161-167. doi:10.1007/s12253-008-9010-7
25. Lawrence G, Wallis M, Allgood P, et al. Population estimates of survival in women with screen-detected and symptomatic breast cancer taking account of lead time and length bias. *Breast Cancer Res Treat.* 2009;116(1):179-185. doi:10.1007/s10549-008-0100-8
26. Duffy SW, Tabár L, Chen HH, et al. The impact of organized mammography service screening on breast carcinoma mortality in seven Swedish Counties: A collaborative evaluation. *Cancer.* 2002;95(3):458-469. doi:10.1002/cncr.10765
27. Vrijens F, Stordeur S, Beirens K, Devriese S, Van Eycken E, Vlayen J. Effect of hospital volume on processes of care and 5-year survival after breast cancer: a population-based study on 25000 women. *Breast.* 2012;21(3):261-266. doi:10.1016/j.breast.2011.12.002
28. Förnvik D, Lång K, Andersson I, Dustler M, Borgquist S, Timberg P. Estimates of breast cancer growth rate from mammograms and its relation to tumour characteristics. *Radiat Prot Dosimetry.* 2016;169(1):151-157. doi:10.1093/rpd/ncv417
29. Cox B, Sneyd MJ. Bias in breast cancer research in the screening era. *Breast.* 2013;22(6):1041-1045. doi:10.1016/j.breast.2013.07.046
30. Caplan L. Delay in breast cancer: Implications for stage at diagnosis and survival. *Front Public Heal.* 2014;2(JUL). doi:10.3389/fpubh.2014.00087
31. Murphy PJ, Marlow LA V., Waller J, Vrinten C. What is it about a cancer diagnosis that would worry people? A population-based survey of adults in England. *BMC Cancer.* 2018;18(1):86. doi:10.1186/s12885-017-3963-4
32. Balasooriya-Smeekens C, Walter FM, Scott S. The role of emotions in time to presentation for symptoms suggestive of cancer: A systematic literature review of quantitative studies. *Psychooncology.* 2015;24(12):1594-1604. doi:10.1002/pon.3833
33. Birrell J, Meares K, Wilkinson A, Freeston M. Toward a definition of intolerance of uncertainty: A review of factor analytical studies of the Intolerance of Uncertainty Scale. *Clin Psychol Rev.* 2011;31(7):1198-1208. doi:10.1016/j.cpr.2011.07.009
34. Tan H-J, Marks LS, Hoyt MA, et al. The Relationship between Intolerance of Uncertainty and Anxiety in Men on Active Surveillance for Prostate Cancer. *J Urol.* 2016;195(6):1724-1730. doi:10.1016/j.juro.2016.01.108
35. Eisen A, Blackmore KM, Meschino WS, et al. Genetic assessment wait time indicators in the High Risk Ontario Breast Screening Program. *Mol Genet Genomic Med.* 2018;6(2):213-223. doi:10.1002/mgg3.359



## Optimizing care for symptomatic breast cancer patients

- 1
  - 2
  - 3
  - 4
  - 5
  - 6
  - 7
  - 8
  - 9
  - 10
  - 11
  - 12
  - 13
  - 14
  - 15
  - 16
  - 17
  - 18
  - 19
  - 20
  - 21
  - 22
  - 23
  - 24
  - 25
  - 26
  - 27
  - 28
  - 29
  - 30
  - 31
  - 32
  - 33
  - 34
  - 35
  - 36
  - 37
  - 38
  - 39
  - 40
  - 41
  - 42
  - 43
  - 44
  - 45
  - 46
  - 47
  - 48
  - 49
  - 50
  - 51
  - 52
  - 53
  - 54
  - 55
  - 56
  - 57
  - 58
  - 59
  - 60
36. Singh D, Malila N, Pokhrel A, Anttila A. Association of symptoms and breast cancer in population-based mammography screening in Finland. *Int J Cancer*. 2015;136(6):E630-E637. doi:10.1002/ijc.29170
37. IA O, L K, D M, S K. Screening Mammography Program of British Columbia: pattern of use and health care system costs. *CMAJ*. 1999;160(3):337-341. <https://pubmed.ncbi.nlm.nih.gov/10065075/>. Accessed August 28, 2021.
38. Healey TT, Agarwal S, Patel R, Ratanaprasatporn L, Ratanaprasatporn L, Lourenco AP. Cancer Yield of Incidental Breast Lesions Detected on Chest Computed Tomography. *J Comput Assist Tomogr*. 2018;42(3):453-456. doi:10.1097/RCT.0000000000000696
39. Benveniste AP, Marom EM, Benveniste MF, Mawlawi O, Fox PS, Yang W. Incidental primary breast cancer detected on PET-CT. *Breast Cancer Res Treat*. 2015;151(2):261-268. doi:10.1007/s10549-015-3402-7
40. Prabhu V, Chhor CM, Ego-Osuala IO, Xiao JM, Hindman NM, Rosenkrantz AB. Frequency and Outcomes of Incidental Breast Lesions Detected on Abdominal MRI Over a 7-Year Period. *AJR Am J Roentgenol*. 2017;208(1):107-113. doi:10.2214/AJR.16.16683
41. Muradali D, Kennedy EB, Eisen A, Holloway CMB, Smith CR, Chiarelli AM. Breast screening for survivors of breast cancer: A systematic review. *Prev Med (Baltim)*. 2017;103:70-75. doi:10.1016/j.ypmed.2017.07.026
42. AB M, C W, C J B, P S, T T, SA N. Twenty five year follow-up for breast cancer incidence and mortality of the Canadian National Breast Screening Study: randomised screening trial. *BMJ*. 2014;348. doi:10.1136/BMJ.G366
43. Y Y, K V, Y S, J D, M W. Importance of quality in breast cancer screening practice - a natural experiment in Alberta, Canada. *BMJ Open*. 2020;10(1). doi:10.1136/BMJOPEN-2018-028766
44. Webber C, Jiang L, Grunfeld E, Groome PA. Identifying predictors of delayed diagnoses in symptomatic breast cancer: a scoping review. *Eur J Cancer Care (Engl)*. 2017;26(2). doi:10.1111/ECC.12483
45. J J, V O, F B, et al. Delays in diagnosis and treatment of breast cancer: a multinational analysis. *Eur J Public Health*. 2014;24(5):761-767. doi:10.1093/EURPUB/CKT131
46. MJ W, O M, J G, et al. Measuring the impact of the COVID-19 pandemic on organized cancer screening and diagnostic follow-up care in Ontario, Canada: A provincial, population-based study. *Prev Med (Baltim)*. 2021;151:106586. doi:10.1016/J.YPMED.2021.106586

**Figure 1: Change in the proportion of patients screened over time**

A) All patients

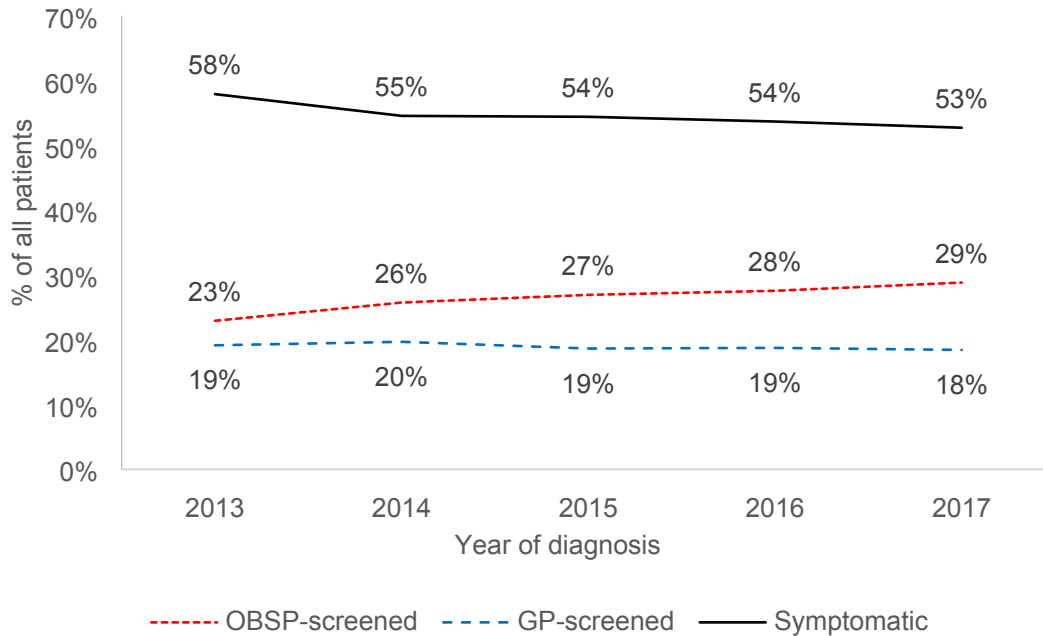

B) Subgroup of presumed OBSP-eligible patients (females aged 50-74 with no prior breast cancer history)

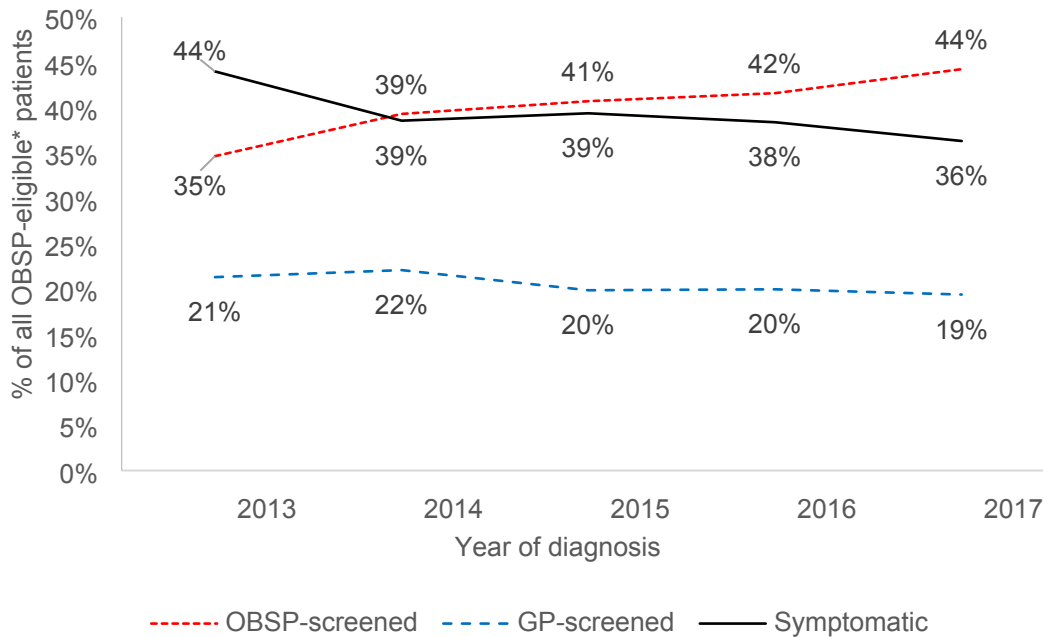

**Figure 2: Kaplan-Meier plot for overall survival by screening and O-BAS**

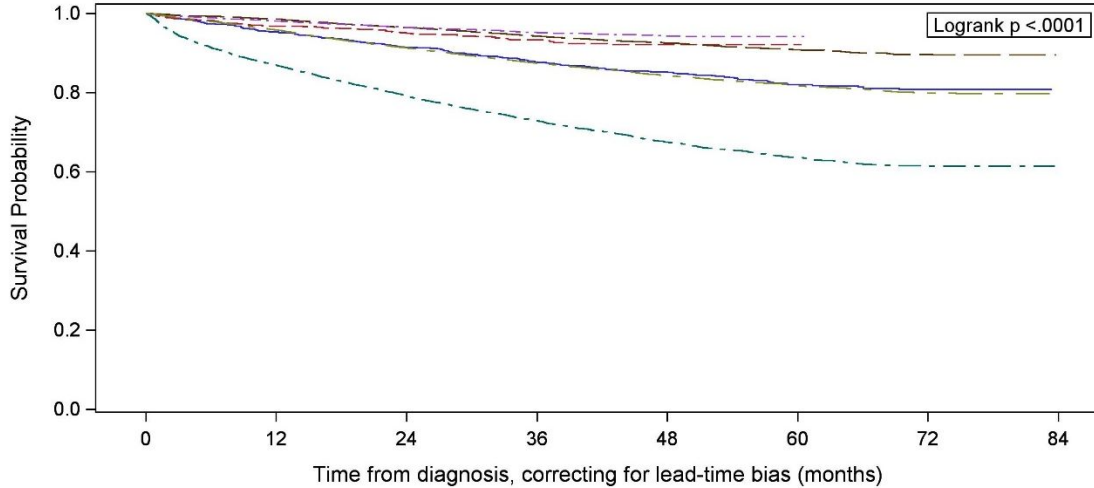

| Patient category         |                            |
|--------------------------|----------------------------|
| 1: Non-O-BAS/GP-screened | 2: Non-O-BAS/OBSP-screened |
| 3: Non-O-BAS/symptomatic | 4: O-BAS/GP-screened       |
| 5: O-BAS/OBSP-screened   | 6: O-BAS/symptomatic       |

|   |       |       |       |       |       |      |      |   |
|---|-------|-------|-------|-------|-------|------|------|---|
| 1 | 1475  | 1394  | 1317  | 997   | 698   | 442  | 199  | 0 |
| 2 | 1476  | 1243  | 786   | 462   | 215   | 2    | 0    | 0 |
| 3 | 5897  | 5090  | 4538  | 3314  | 2223  | 1376 | 593  | 0 |
| 4 | 8255  | 8089  | 7764  | 5967  | 4287  | 2714 | 1185 | 0 |
| 5 | 12138 | 10451 | 6964  | 4238  | 1795  | 19   | 0    | 0 |
| 6 | 22180 | 21127 | 19708 | 14722 | 10370 | 6451 | 2893 | 0 |

Kaplan-Meier plot for overall survival by whether patients were diagnosed at an O-BAS and whether they were OBSP-screened-detected, screened by their GP (general practitioner) or symptomatic. OBSP – Ontario Breast Screening Program; O-BAS – OBSP-affiliated breast assessment site

**Figure 3: Causal diagram of symptomatic versus screened patients**

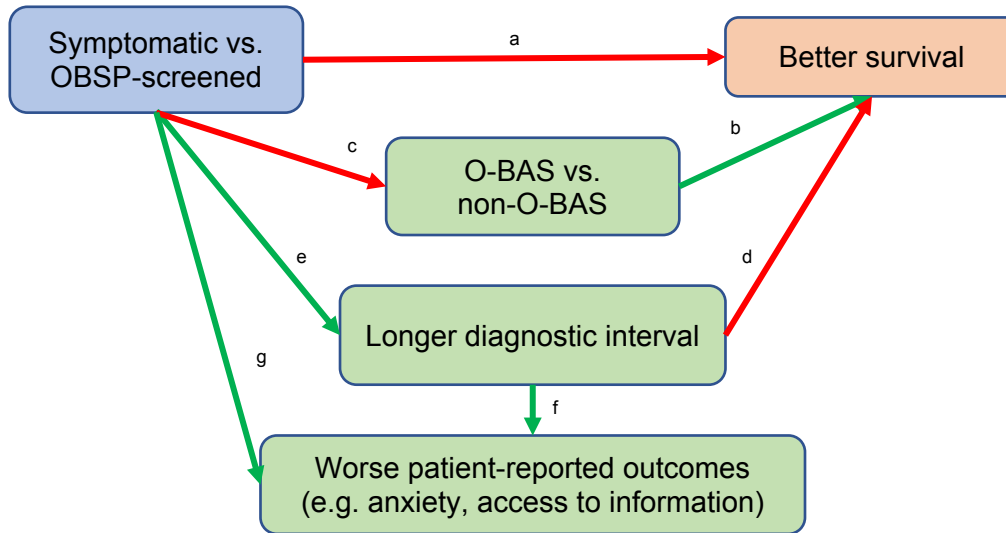

<sup>a</sup> symptomatic patients have features (e.g. demographic, clinical, and tumor characteristics) that negatively affect survival

<sup>b</sup> O-BAS is associated with better overall survival

<sup>c</sup> symptomatic patients are less likely to be referred to an O-BAS

<sup>d</sup> a longer diagnostic interval may result in worse survival for some patients

<sup>e</sup> symptomatic patients have a longer diagnostic interval

<sup>f</sup> a longer diagnostic interval may increase patient anxiety and other patient-reported outcomes

<sup>g</sup> symptomatic patients are more likely to have anxiety due to the presence of painful or noticeable breast symptoms, independent of wait-times

O-BAS - breast assessment site affiliated with the Ontario Breast Screening Program

**Table 1: Comparison of socio-demographic, clinical factors and tumor characteristics between O-BAS and non-O-BAS breast cancer patients**

|                                                                      | Non-O-BAS<br>N=8862 | O-BAS<br>N=42598 | O-BAS vs. non-O-BAS<br>(crude) |         | O-BAS vs. non-O-BAS<br>(adjusted) <sup>a</sup> |         |
|----------------------------------------------------------------------|---------------------|------------------|--------------------------------|---------|------------------------------------------------|---------|
|                                                                      |                     |                  | OR (95% CI)                    | p-value | OR (95% CI)                                    | p-value |
| <b>Screening status</b>                                              |                     |                  |                                |         |                                                |         |
| Symptomatic                                                          | 5908 (67%)          | 22199 (52%)      | 1.0 (ref)                      | <.0001  | 1.0 (ref)                                      | <.0001  |
| GP-screened                                                          | 1477 (17%)          | 8261 (19%)       | 1.49 (1.40-1.58)               |         | 1.31 (1.23-1.41)                               |         |
| OBSP-screened                                                        | 1477 (17%)          | 12138 (29%)      | 2.19 (2.06-2.33)               |         | 1.68 (1.57-1.80)                               |         |
| <b>Patient socio-demographic factors</b>                             |                     |                  |                                |         |                                                |         |
| Sex                                                                  |                     |                  |                                |         |                                                |         |
| Female                                                               | 8750 (98.7%)        | 42285 (99.3%)    | 1.0 (ref)                      | <.0001  | 1.0 (ref)                                      | 0.58    |
| Male                                                                 | 112 (1.3%)          | 313 (0.7%)       | 0.58 (0.47-0.72)               |         | 0.93 (0.73-1.19)                               |         |
| Age (x10) years                                                      |                     |                  |                                |         |                                                |         |
| <50                                                                  | 66 (SD 14.6)        | 63 (SD 13.5)     | 0.87 (0.85-0.88)               | <.0001  | 0.88 (0.86-0.90)                               | <.0001  |
| 50-74                                                                | 1328 (15%)          | 7244 (17%)       | 1.0 (ref)                      | <.0001  | –                                              | –       |
| >74                                                                  | 4833 (55%)          | 26048 (61%)      | 0.99 (0.93-1.06)               |         |                                                |         |
|                                                                      | 2701 (30%)          | 9306 (22%)       | 0.63 (0.59-0.68)               |         |                                                |         |
| After-tax neighbourhood income quintile <sup>b</sup>                 |                     |                  |                                |         |                                                |         |
| Highest                                                              | 1756 (20%)          | 9368 (22%)       | 1.0 (ref)                      | <.0001  | 1.0 (ref)                                      | <.0001  |
| Mid-high                                                             | 1640 (19%)          | 8235 (20%)       | 0.94 (0.88-1.01)               |         | 0.91 (0.84-0.99)                               |         |
| Middle                                                               | 1678 (19%)          | 8291 (20%)       | 0.93 (0.86-1.00)               |         | 0.93 (0.85-1.00)                               |         |
| Mid-low                                                              | 1797 (20%)          | 8539 (20%)       | 0.89 (0.83-0.96)               |         | 0.88 (0.81-0.95)                               |         |
| Lowest                                                               | 1933 (22%)          | 7695 (18%)       | 0.75 (0.70-0.80)               |         | 0.77 (0.70-0.83)                               |         |
| Neighbourhood immigrant density <sup>b</sup>                         |                     |                  |                                |         |                                                |         |
| Least dense                                                          | 5221 (59%)          | 24537 (58%)      | 1.0 (ref)                      | 0.004   | 1.0 (ref)                                      | 0.0002  |
| Mid-dense                                                            | 2068 (24%)          | 10661 (25%)      | 1.10 (1.04-1.16)               |         | 1.08 (1.01-1.16)                               |         |
| Most dense                                                           | 1497 (17%)          | 7061 (17%)       | 1.00 (0.94-1.07)               |         | 0.91 (0.83-1.00)                               |         |
| Rurality <sup>b</sup>                                                |                     |                  |                                |         |                                                |         |
| Urban                                                                | 7479 (85%)          | 37789 (90%)      | 1.0 (ref)                      | <.0001  | 1.0 (ref)                                      | <.0001  |
| Rural                                                                | 1326 (15%)          | 4351 (10%)       | 0.65 (0.61-0.69)               |         | 0.65 (0.59-0.71)                               |         |
| Distance (per 100km) <sup>c</sup>                                    |                     |                  |                                |         |                                                |         |
|                                                                      | 15.7±21.6           | 11.9±19.2        | 0.44 (0.40- 0.49)              | <.0001  | 0.36 (0.31-0.42)                               | <.0001  |
| <b>Patient clinical factors</b>                                      |                     |                  |                                |         |                                                |         |
| Charlson Comorbidity index                                           |                     |                  |                                |         |                                                |         |
| Missing                                                              | 3011 (34%)          | 16228 (38%)      | 1.12 (1.06-1.18)               |         | 1.04 (0.98-1.10)                               |         |
| 0                                                                    | 4318 (49%)          | 20825 (49%)      | 1.0 (ref)                      | <.0001  | 1.0 (ref)                                      | 0.0002  |
| 1                                                                    | 935 (10%)           | 3665 (9%)        | 0.81 (0.75-0.88)               |         | 0.89 (0.81-0.97)                               |         |
| 2                                                                    | 316 (4%)            | 1088 (2%)        | 0.71 (0.63-0.81)               |         | 0.88 (0.76-1.02)                               |         |
| 3+                                                                   | 282 (3%)            | 792 (2%)         | 0.58 (0.51-0.67)               |         | 0.78 (0.66-0.91)                               |         |
| Prior breast cancer history relative to index diagnosis <sup>d</sup> |                     |                  |                                |         |                                                |         |
| Never                                                                | 8074 (91%)          | 39541 (93%)      | 1.0 (ref)                      | <.0001  | 1.0 (ref)                                      |         |
| ≤5 years                                                             | 72 (1%)             | 250 (1%)         | 0.71 (0.55-0.92)               |         | 1.04 (0.78-1.39)                               | 0.0005  |
| 5-10 years                                                           | 239 (3%)            | 852 (2%)         | 0.73 (0.63-0.84)               |         | 1.21 (1.02-1.42)                               |         |

1

2

3

4

5

6

7

8

9

10

11

12

13

14

15

16

17

18

19

20

21

22

23

24

25

26

27

28

29

30

31

32

33

34

35

36

37

38

39

40

41

42

43

44

45

46

47

48

49

50

51

52

53

54

55

56

57

58

59

60

|                                                             |            |             |                  |        |                  |      |
|-------------------------------------------------------------|------------|-------------|------------------|--------|------------------|------|
| ≥10 years                                                   | 477 (5%)   | 1955 (5%)   | 0.84 (0.76-0.93) |        | 1.25 (1.11-1.41) |      |
| Prior non-breast cancer history relative to index diagnosis |            |             |                  |        |                  |      |
| Never                                                       | 8180 (92%) | 39563 (93%) | 1.0 (ref)        | <.0001 | 1.0 (ref)        | 0.14 |
| ≤5 years                                                    | 295 (3%)   | 1172 (3%)   | 0.82 (0.72-0.94) |        | 1.00 (0.86-1.15) |      |
| 5-10 years                                                  | 136 (2%)   | 686 (2%)    | 1.04 (0.87-1.26) |        | 1.22 (1.00-1.50) |      |
| ≥10 years                                                   | 251 (3%)   | 1177 (3%)   | 0.97 (0.84-1.11) |        | 1.11 (0.95-1.29) |      |

### Cancer characteristics

|                          |            |             |                  |        |                  |        |
|--------------------------|------------|-------------|------------------|--------|------------------|--------|
| Laterality               |            |             |                  |        |                  |        |
| Right                    | 4288 (48%) | 20701 (49%) | 1.0 (ref)        | 0.47   | 1.0 (ref)        | 0.02   |
| Left                     | 4329 (49%) | 21516 (51%) | 1.03 (0.98-1.08) |        | 1.03 (0.97-1.08) |        |
| Bilateral                | 65 (1%)    | 319 (1%)    | 1.02 (0.78-1.33) |        | 1.49 (1.11-2.01) |        |
| Cancer stage             |            |             |                  |        |                  |        |
| 0                        | 28 (<1%)   | 171 (<1%)   | 0.91 (0.61-1.36) |        | 1.46 (0.95-2.24) |        |
| 1                        | 2755 (32%) | 18463 (44%) | 1.0 (ref)        | <.0001 | 1.0 (ref)        | <.0001 |
| 2                        | 2861 (33%) | 15707 (38%) | 0.82 (0.77-0.87) |        | 0.91 (0.85-0.97) |        |
| 3                        | 1134 (13%) | 5023 (12%)  | 0.66 (0.61-0.71) |        | 0.75 (0.69-0.82) |        |
| 4                        | 1085 (12%) | 1343 (3%)   | 0.19 (0.17-0.20) |        | 0.23 (0.21-0.26) |        |
| Unknown                  | 832 (10%)  | 1167 (3%)   | 0.21 (0.19-0.23) |        | 0.36 (0.31-0.40) |        |
| Hormone receptor profile |            |             |                  |        |                  |        |
| ER-, PR-, HER2-          | 679 (10%)  | 3814 (10%)  | 1.0 (ref)        | 0.08   | 1.0 (ref)        | <.0001 |
| ER-, PR-, HER2+          | 325 (5%)   | 1807 (5%)   | 0.99 (0.86-1.14) |        | 1.04 (0.89-1.21) |        |
| ER-, PR+, HER2-          | 36 (1%)    | 182 (0%)    | 0.90 (0.62-1.30) |        | 1.11 (0.75-1.64) |        |
| ER-, PR+, HER2+          | 20 (0%)    | 69 (0%)     | 0.61 (0.37-1.02) |        | 0.91 (0.53-1.58) |        |
| ER+, PR-, HER2-          | 561 (8%)   | 2751 (8%)   | 0.87 (0.77-0.99) |        | 0.89 (0.78-1.01) |        |
| ER+, PR-, HER2+          | 204 (3%)   | 1036 (3%)   | 0.90 (0.76-1.07) |        | 0.96 (0.80-1.16) |        |
| ER+, PR+, HER2-          | 4379 (66%) | 24116 (66%) | 0.98 (0.90-1.07) |        | 0.93 (0.84-1.02) |        |
| ER+, PR+, HER2+          | 473 (7%)   | 2773 (8%)   | 1.04 (0.92-1.19) |        | 0.99 (0.87-1.14) |        |
| Missing                  | 2185       | 6050        | 0.49 (0.45-0.54) |        | 0.67 (0.60-0.75) |        |
| Topography               |            |             |                  |        |                  |        |
| Upper-outer quadrant     | 2754 (31%) | 15672 (37%) | 1.0 (ref)        | <.0001 | 1.0 (ref)        | <.0001 |
| Breast NOS               | 1452 (16%) | 3411 (8%)   | 0.41 (0.38-0.44) |        | 0.69 (0.63-0.75) |        |
| Overlapping lesion       | 1618 (18%) | 7720 (18%)  | 0.84 (0.78-0.90) |        | 0.93 (0.86-1.00) |        |
| Upper-inner quadrant     | 1007 (11%) | 5806 (14%)  | 1.01 (0.94-1.10) |        | 0.98 (0.90-1.07) |        |
| Lower-outer quadrant     | 721 (8%)   | 4056 (10%)  | 0.99 (0.90-1.08) |        | 1.00 (0.91-1.10) |        |
| Central portion          | 503 (6%)   | 2205 (5%)   | 0.77 (0.69-0.86) |        | 0.92 (0.83-1.03) |        |
| Lower-inner quadrant     | 470 (5%)   | 2558 (6%)   | 0.96 (0.86-1.06) |        | 0.98 (0.87-1.09) |        |
| Nipple                   | 236 (3%)   | 922 (2%)    | 0.69 (0.59-0.80) |        | 0.76 (0.65-0.90) |        |
| Axillary tail            | 101 (1%)   | 248 (0.1%)  | 0.43 (0.34-0.55) |        | 0.55 (0.43-0.72) |        |

### Other characteristics

|                                              |            |            |                  |      |                  |      |
|----------------------------------------------|------------|------------|------------------|------|------------------|------|
| Year of diagnosis (row percentages provided) |            |            |                  |      |                  |      |
| 2013                                         | 1767 (18%) | 8037 (82%) | 1.0 (ref)        | 0.01 | 1.0 (ref)        | 0.03 |
| 2014                                         | 1748 (17%) | 8447 (83%) | 1.06 (0.99-1.14) |      | 1.02 (0.95-1.11) |      |
| 2015                                         | 1715 (17%) | 8518 (83%) | 1.09 (1.02-1.18) |      | 1.03 (0.95-1.12) |      |
| 2016                                         | 1882 (18%) | 8695 (82%) | 1.02 (0.95-1.09) |      | 0.97 (0.90-1.05) |      |
| 2017                                         | 1750 (16%) | 8901 (84%) | 1.12 (1.04-1.20) |      | 1.10 (1.02-1.19) |      |

<sup>a</sup> N=49,420; adjusted for screening status, age, neighbourhood income quintile, neighbourhood immigrant density, rurality, distance to the closest O-BAS, Charlson comorbidity index, prior breast cancer history, prior non-breast cancer history, laterality, cancer stage, hormone receptor profile, topography, year of diagnosis and level of geography (Local Health Integration Network, LHIN).

<sup>b</sup> source: (or adapted from) Statistics Canada Postal Code Conversion File and Postal Code Conversion File Plus (June 2017) which is based on data licensed from Canada Post Corporation. The patients' postal code at diagnosis was used.

---

<sup>c</sup> odds ratio reflects the odds of being diagnosed in a O-BAS for every 100-kilometer increase in Euclidean distance to the patients' closest O-BAS. The patients' postal code at diagnosis was used.

<sup>d</sup> numbers rounded to nearest tenth to prevent back-calculation of small cells

OR – odds ratio; CI – confidence interval; OBSP – Ontario Breast Screening Program; O-BAS – OBSP-affiliated Breast Assessment Site; GP – general practitioner; ER – estrogen receptor; PR – progesterone receptor; HER2 – human epidermal growth factor receptor-2; NOS – not otherwise specified

Confidential

**Table 2: Comparison of socio-demographic, clinical and cancer characteristics between screened and symptomatic breast cancer patients**

|                                                         | <b>OBSP-<br/>screened<br/>N=13615<br/>(26%)</b> | <b>GP-<br/>screened<br/>N=9738<br/>(19%)</b> | <b>Symptomatic<br/>N=28107<br/>(55%)</b> | <b>OBSP-screen-<br/>detected<br/>OR (95% CI)<sup>a</sup></b> | <b>GP-screened<br/>OR (95% CI)<sup>a</sup></b> | <b>p-value<sup>a</sup></b> |
|---------------------------------------------------------|-------------------------------------------------|----------------------------------------------|------------------------------------------|--------------------------------------------------------------|------------------------------------------------|----------------------------|
| O-BAS                                                   |                                                 |                                              |                                          |                                                              |                                                |                            |
| Yes                                                     | 12138 (89%)                                     | 8261 (85%)                                   | 22199 (79%)                              | 1.73 (1.62-1.86)                                             | 1.26 (1.18-1.35)                               | <.0001                     |
| No                                                      | 1477 (11%)                                      | 1477 (15%)                                   | 5908 (21%)                               | 1.0 (ref)                                                    | 1.0 (ref)                                      |                            |
| <b>Patient socio-demographic characteristics</b>        |                                                 |                                              |                                          |                                                              |                                                |                            |
| Sex                                                     |                                                 |                                              |                                          |                                                              |                                                |                            |
| Female                                                  | 13615 (100)                                     | 9714 (99.8)                                  | 27706 (98.6)                             | N/A                                                          | 0.18 (0.12-0.28)                               | <.0001                     |
| Male                                                    | 0 (0.0)                                         | 24 (0.3)                                     | 401 (1.4)                                | N/A                                                          | 1.0 (ref)                                      |                            |
| Age (continuous)                                        | 63.7±8.0                                        | 62.1±12.2                                    | 63.4±16.1                                | 1.09 (0.07-1.11)                                             | 0.96 (0.94-0.98)                               | <.0001                     |
| Neighbourhood<br>income quintile <sup>b</sup>           |                                                 |                                              |                                          |                                                              |                                                |                            |
| Highest                                                 | 3042 (23%)                                      | 2243 (23%)                                   | 5839 (21%)                               | 1.0 (ref)                                                    | 1.0 (ref)                                      | <.0001                     |
| Mid-high                                                | 2727 (20%)                                      | 1943 (20%)                                   | 5205 (19%)                               | 1.05 (0.98-1.12)                                             | 0.97 (0.90-1.04)                               |                            |
| Middle                                                  | 2707 (20%)                                      | 1870 (19%)                                   | 5392 (19%)                               | 1.03 (0.96-1.10)                                             | 0.91 (0.84-0.98)                               |                            |
| Mid-low                                                 | 2703 (20%)                                      | 1913 (20%)                                   | 5720 (21%)                               | 0.98 (0.91-1.05)                                             | 0.86 (0.80-0.93)                               |                            |
| Lowest                                                  | 2275 (17%)                                      | 1667 (17%)                                   | 5686 (20%)                               | 0.85 (0.79-0.92)                                             | 0.76 (0.71-0.83)                               |                            |
| Neighbourhood<br>immigrant density <sup>b</sup>         |                                                 |                                              |                                          |                                                              |                                                |                            |
| Least dense                                             | 8368 (62%)                                      | 5068 (52%)                                   | 16322 (58%)                              | 1.0 (ref)                                                    | 1.0 (ref)                                      | <.0001                     |
| Mid-dense                                               | 3124 (23%)                                      | 2704 (28%)                                   | 6901 (25%)                               | 0.92 (0.86-0.97)                                             | 1.21 (1.14-1.28)                               |                            |
| Most dense                                              | 2018 (15%)                                      | 1897 (20%)                                   | 4643 (17%)                               | 0.96 (0.89-1.03)                                             | 1.38 (1.28-1.48)                               |                            |
| Rurality <sup>b</sup>                                   |                                                 |                                              |                                          |                                                              |                                                |                            |
| Urban                                                   | 11765 (87%)                                     | 8790 (91%)                                   | 24713 (89%)                              | 1.0 (ref)                                                    | 1.0 (ref)                                      | 0.004                      |
| Rural                                                   | 1693 (13%)                                      | 848 (9%)                                     | 3136 (11%)                               | 1.13 (1.04-1.23)                                             | 0.97 (0.88-1.07)                               |                            |
| Distance to closest<br>O-BAS (km) <sup>c</sup>          | 13.2±20.2                                       | 10.8±14.9                                    | 12.8±20.8                                | 1.00 (0.87-1.15)                                             | 0.72 (0.61-0.85)                               | 0.0005                     |
| <b>Patient clinical characteristics</b>                 |                                                 |                                              |                                          |                                                              |                                                |                            |
| Charlson<br>Comorbidity Index                           |                                                 |                                              |                                          |                                                              |                                                |                            |
| Missing                                                 | 5328 (39%)                                      | 3839 (39%)                                   | 10072 (36%)                              | 1.07 (1.02-1.13)                                             | 1.05 (1.00-1.11)                               |                            |
| 0                                                       | 6738 (49%)                                      | 4784 (49%)                                   | 13621 (48%)                              | 1.0 (ref)                                                    | 1.0 (ref)                                      | <.0001                     |
| 1                                                       | 1095 (8%)                                       | 778 (8%)                                     | 2727 (10%)                               | 0.84 (0.77-0.91)                                             | 0.89 (0.81-0.98)                               |                            |
| 2                                                       | 277 (2%)                                        | 185 (2%)                                     | 942 (3%)                                 | 0.66 (0.56-0.77)                                             | 0.63 (0.53-0.74)                               |                            |
| 3+                                                      | 177 (1%)                                        | 152 (2%)                                     | 745 (3%)                                 | 0.53 (0.44-0.63)                                             | 0.70 (0.58-0.84)                               |                            |
| Prior breast cancer history relative to index diagnosis |                                                 |                                              |                                          |                                                              |                                                |                            |
| Never                                                   | 13576 (100%)                                    | 8693 (89%)                                   | 25346 (90%)                              | 1.0 (ref)                                                    | 1.0 (ref)                                      | <.0001                     |
| ≤5 years                                                | <6                                              | 83 (1%)                                      | 235 (1%)                                 | 0.03 (0.01-0.08)                                             | 0.91 (0.70-1.18)                               |                            |



|                                                                    |             |            |             |                  |                  |        |
|--------------------------------------------------------------------|-------------|------------|-------------|------------------|------------------|--------|
| 5-10 years                                                         | 17 (<1%)    | 293 (3%)   | 785 (3%)    | 0.03 (0.02-0.05) | 1.02 (0.88-1.17) |        |
| ≥10 years                                                          | 22 (<1%)    | 669 (7%)   | 1741 (6%)   | 0.02 (0.01-0.03) | 1.05 (0.95-1.15) |        |
| <b>Prior non-breast cancer history relative to index diagnosis</b> |             |            |             |                  |                  |        |
| Never                                                              | 12718 (93%) | 9096 (93%) | 25929 (92%) | 1.0 (ref)        | 1.0 (ref)        | <.0001 |
| ≤5 years                                                           | 313 (2%)    | 269 (3%)   | 885 (3%)    | 0.62 (0.54-0.72) | 0.96 (0.83-1.11) |        |
| 5-10 years                                                         | 221 (2%)    | 149 (2%)   | 452 (2%)    | 0.86 (0.72-1.03) | 1.04 (0.86-1.27) |        |
| ≥10 years                                                          | 363 (3%)    | 224 (2%)   | 841 (3%)    | 0.72 (0.63-0.82) | 0.80 (0.68-0.94) |        |

### Cancer characteristics

|                                 |            |            |             |                  |                  |        |
|---------------------------------|------------|------------|-------------|------------------|------------------|--------|
| <b>Laterality</b>               |            |            |             |                  |                  |        |
| Right                           | 6660 (49%) | 4735 (49%) | 13594 (49%) | 1.0 (ref)        | 1.0 (ref)        | 0.01   |
| Left                            | 6881 (51%) | 4909 (51%) | 14055 (50%) | 0.99 (0.95-1.04) | 1.00 (0.96-1.05) |        |
| Bilateral                       | 71 (<1%)   | 61 (<1%)   | 252 (1%)    | 0.61 (0.46-0.81) | 0.75 (0.56-1.00) |        |
| <b>Cancer stage</b>             |            |            |             |                  |                  |        |
| 0                               | 32 (<1%)   | 62 (1%)    | 105 (<1%)   | 0.38 (0.25-0.57) | 0.99 (0.71-1.38) |        |
| 1                               | 8523 (64%) | 4529 (47%) | 8166 (30%)  | 1.0 (ref)        | 1.0 (ref)        | <.0001 |
| 2                               | 3859 (29%) | 3235 (34%) | 11474 (42%) | 0.31 (0.29-0.32) | 0.51 (0.48-0.54) |        |
| 3                               | 731 (5%)   | 1057 (11%) | 4369 (16%)  | 0.16 (0.15-0.18) | 0.44 (0.40-0.47) |        |
| 4                               | 97 (1%)    | 269 (3%)   | 2062 (7%)   | 0.06 (0.05-0.07) | 0.26 (0.22-0.29) |        |
| Unknown                         | 185 (1%)   | 405 (4%)   | 1409 (5%)   | 0.25 (0.21-0.30) | 0.56 (0.49-0.65) |        |
| <b>Hormone receptor profile</b> |            |            |             |                  |                  |        |
| ER-, PR-, HER2-                 | 895 (7%)   | 822 (8%)   | 2776 (10%)  | 1.0 (ref)        | 1.0 (ref)        | <.0001 |
| ER-, PR-, HER2+                 | 402 (3%)   | 394 (4%)   | 1336 (5%)   | 1.00 (0.87-1.16) | 1.01 (0.88-1.17) |        |
| ER-, PR+, HER2-                 | 29 (<1%)   | 45 (<1%)   | 144 (1%)    | 0.64 (0.41-0.98) | 1.08 (0.76-1.53) |        |
| ER-, PR+, HER2+                 | 11 (<1%)   | 15 (<1%)   | 63 (<1%)    | 0.79 (0.40-1.56) | 0.97 (0.55-1.74) |        |
| ER+, PR-, HER2-                 | 923 (7%)   | 625 (6%)   | 1764 (6%)   | 1.53 (1.36-1.72) | 1.18 (1.04-1.33) |        |
| ER+, PR-, HER2+                 | 274 (2%)   | 222 (2%)   | 744 (3%)    | 1.21 (1.02-1.43) | 1.03 (0.87-1.23) |        |
| ER+, PR+, HER2-                 | 8736 (64%) | 5347 (55%) | 14412 (51%) | 1.51 (1.39-1.65) | 1.14 (1.05-1.25) |        |
| ER+, PR+, HER2+                 | 742 (5%)   | 575 (6%)   | 1929 (7%)   | 1.19 (1.06-1.35) | 1.00 (0.88-1.13) |        |
| Missing                         | 1603 (12%) | 1693 (17%) | 4939 (18%)  | 1.20 (1.07-1.34) | 1.22 (1.09-1.35) |        |
| <b>Topography</b>               |            |            |             |                  |                  |        |
| Upper-outer quadrant            | 5462 (40%) | 3497 (36%) | 9467 (34%)  | 1.0 (ref)        | 1.0 (ref)        | <.0001 |
| Overlapping lesion              | 2578 (19%) | 1742 (18%) | 5018 (18%)  | 0.91 (0.86-0.97) | 0.97 (0.91-1.04) |        |
| Breast NOS                      | 811 (6%)   | 876 (9%)   | 3176 (11%)  | 0.61 (0.56-0.68) | 0.84 (0.77-0.92) |        |
| Lower-outer quadrant            | 1227 (9%)  | 948 (10%)  | 2602 (9%)   | 0.81 (0.74-0.88) | 0.98 (0.90-1.07) |        |
| Upper-inner quadrant            | 1986 (15%) | 1260 (13%) | 3567 (13%)  | 0.85 (0.79-0.91) | 0.90 (0.83-0.97) |        |
| Lower-inner quadrant            | 820 (6%)   | 578 (6%)   | 1630 (6%)   | 0.83 (0.75-0.91) | 0.92 (0.83-1.03) |        |
| Central portion                 | 477 (4%)   | 539 (6%)   | 1692 (6%)   | 0.62 (0.55-0.69) | 1.00 (0.90-1.12) |        |
| Nipple                          | 202 (1%)   | 233 (2%)   | 723 (3%)    | 0.55 (0.46-0.65) | 0.88 (0.75-1.04) |        |
| Axillary tail                   | 52 (<1%)   | 65 (<1%)   | 232 (<1%)   | 0.54 (0.39-0.76) | 0.87 (0.65-1.16) |        |

### Other characteristics

|                                                 |            |            |            |                  |                  |        |
|-------------------------------------------------|------------|------------|------------|------------------|------------------|--------|
| <b>Year of diagnosis (row percent provided)</b> |            |            |            |                  |                  |        |
| 2013                                            | 2248 (23%) | 1877 (19%) | 5679 (58%) | 1.0 (ref)        | 1.0 (ref)        | <.0001 |
| 2014                                            | 2625 (26%) | 2007 (20%) | 5563 (55%) | 1.17 (1.09-1.26) | 1.10 (1.02-1.18) |        |
| 2015                                            | 2756 (27%) | 1908 (19%) | 5569 (54%) | 1.24 (1.15-1.34) | 1.04 (0.97-1.13) |        |
| 2016                                            | 2915 (28%) | 1983 (19%) | 5679 (54%) | 1.29 (1.20-1.39) | 1.07 (0.99-1.15) |        |
| 2017                                            | 3071 (29%) | 1963 (18%) | 5617 (53%) | 1.40 (1.31-1.51) | 1.07 (0.99-1.15) |        |

<sup>a</sup> N=49,420; derived from a multinomial logistic regression adjusted for all variables in the table. All odds ratios (OR) and 95% confidence intervals (CI) use symptomatic as the referent.

<sup>b</sup> source: (or adapted from) Statistics Canada Postal Code Conversion File and Postal Code Conversion File Plus (June 2017) which is based on data licensed from Canada Post Corporation. The patients' postal code at diagnosis was used.

1  
2  
3  
4  
5  
6  
7  
8  
9  
10  
11  
12  
13  
14  
15  
16  
17  
18  
19  
20  
21  
22  
23  
24  
25  
26  
27  
28  
29  
30  
31  
32  
33  
34  
35  
36  
37  
38  
39  
40  
41  
42  
43  
44  
45  
46  
47  
48  
49  
50  
51  
52  
53  
54  
55  
56  
57  
58  
59  
60

---

° average Euclidean distance to the patients' closest O-BAS. The patients' postal code at diagnosis was used.  
OBSP – Ontario Breast Screening Program; O-BAS – OBSP-affiliated Breast Assessment Site; GP – general practitioner; ER –  
estrogen receptor; PR – progesterone receptor; HER2 – human epidermal growth factor receptor-2; NOS – not otherwise  
specified; N/A – not applicable

Confidential

**Table 3: Factors associated with wait-times**

|                                                                | Diagnostic interval (time from suspicion until diagnosis)         |         | Pre-treatment interval (time from diagnosis until first treatment) |         |
|----------------------------------------------------------------|-------------------------------------------------------------------|---------|--------------------------------------------------------------------|---------|
|                                                                | N=46,004<br>Mean 62 (SD 65.6) days<br>Median 35 (IQR 19, 82) days |         | N=48,316<br>Mean 38 (SD 29.5) days<br>Median 34 (IQR 23, 47) days  |         |
|                                                                | Adjusted beta (95% CI) <sup>a</sup>                               | p-value | Adjusted beta (95% CI) <sup>a</sup>                                | p-value |
| <b>O-BAS</b>                                                   |                                                                   |         |                                                                    |         |
| No                                                             | 0 (ref)                                                           | 0.01    | 0 (ref)                                                            | <.0001  |
| Yes                                                            | -2.0 (-3.7, -0.4)                                                 |         | -3.9 (-4.6, -3.2)                                                  |         |
| <b>Screening</b>                                               |                                                                   |         |                                                                    |         |
| Symptomatic                                                    | 0 (ref)                                                           | <.0001  | 0 (ref)                                                            | <.0001  |
| OBSP-screened                                                  | -24.8 (-26.3, -23.4)                                              |         | -2.6 (-3.2, -1.9)                                                  |         |
| GP-screened                                                    | 4.9 (3.3, 6.4)                                                    |         | -1.1 (-1.8, -0.4)                                                  |         |
| <b>Patient socio-demographic characteristics</b>               |                                                                   |         |                                                                    |         |
| Age (continuous)                                               | -3.1 (-3.6, -2.7)                                                 | <.0001  | 0.4 (0.2, 0.6)                                                     | 0.0003  |
| Male sex                                                       | -13.0 (-19.7, -6.3)                                               | 0.0001  | -2.9 (-5.8, 0.1)                                                   | 0.06    |
| <b>Neighbourhood income quintile<sup>b</sup></b>               |                                                                   |         |                                                                    |         |
| Highest                                                        | 0 (ref)                                                           |         | 0 (ref)                                                            | 0.006   |
| Mid-high                                                       | -0.4 (-2.2, 1.4)                                                  |         | 0.3 (-0.5, 1.1)                                                    |         |
| Middle                                                         | -0.1 (-2.0, 1.7)                                                  |         | 0.5 (-0.3, 1.4)                                                    |         |
| Mid-low                                                        | 0.1 (-1.7, 2.0)                                                   |         | 1.1 (0.2, 1.9)                                                     |         |
| Lowest                                                         | 0.2 (-1.7, 2.2)                                                   | 0.98    | 1.5 (0.6, 2.4)                                                     |         |
| <b>Neighbourhood immigrant density<sup>b</sup></b>             |                                                                   |         |                                                                    |         |
| Least dense                                                    | 0 (ref)                                                           | <.0001  | 0 (ref)                                                            | 0.24    |
| Mid-dense                                                      | 3.8 (2.2, 5.3)                                                    |         | 0.4 (-.4, 1.1)                                                     |         |
| Most dense                                                     | 6.3 (4.2, 8.5)                                                    |         | 0.8 (-0.1, 1.8)                                                    |         |
| <b>Rurality<sup>b</sup></b>                                    |                                                                   |         |                                                                    |         |
| Urban                                                          | 0 (ref)                                                           | 0.92    | 0 (ref)                                                            | 0.05    |
| Rural                                                          | -0.1 (-2.3, 2.1)                                                  |         | -1.0 (-2.0, -0.0)                                                  |         |
| Distance to closest O-BAS, per 100km <sup>c</sup>              | 0.8 (-3.1, 4.7)                                                   | 0.68    | 0.5 (-1.2, 2.2)                                                    | 0.56    |
| <b>Patient clinical characteristics</b>                        |                                                                   |         |                                                                    |         |
| <b>Charlson Comorbidity Index</b>                              |                                                                   |         |                                                                    |         |
| Missing                                                        | -7.8 (-9.1, -6.6)                                                 |         | 1.0 (0.4, 1.5)                                                     |         |
| 0                                                              | 0 (ref)                                                           | <.0001  | 0 (ref)                                                            | <.0001  |
| 1                                                              | 1.1 (-1.0, 3.3)                                                   |         | 0.4 (-0.6, 1.3)                                                    |         |
| 2                                                              | -0.6 (-4.3, 3.0)                                                  |         | 1.6 (-0.1, 3.2)                                                    |         |
| 3+                                                             | -1.9 (-6.1, 2.3)                                                  |         | 5.5 (3.6, 7.4)                                                     |         |
| <b>Prior breast cancer history relative to index diagnosis</b> |                                                                   |         |                                                                    |         |
| Never                                                          | 0 (ref)                                                           | <.0001  | 0 (ref)                                                            | <.0001  |
| ≤5 years                                                       | 79.9 (72.8, 87.0)                                                 |         | -8.2 (-11.4, -4.9)                                                 |         |
| 5-10 years                                                     | 35.0 (31.1, 39.0)                                                 |         | 0.8 (-1.1, 2.6)                                                    |         |

1  
2  
3  
4  
5  
6  
7  
8  
9  
10  
11  
12  
13  
14  
15  
16  
17  
18  
19  
20  
21  
22  
23  
24  
25  
26  
27  
28  
29  
30  
31  
32  
33  
34  
35  
36  
37  
38  
39  
40  
41  
42  
43  
44  
45  
46  
47  
48  
49  
50  
51  
52  
53  
54  
55  
56  
57  
58  
59  
60

|           |                  |  |                 |  |
|-----------|------------------|--|-----------------|--|
| ≥10 years | 12.5 (9.7, 15.3) |  | 0.7 (-0.6, 1.9) |  |
|-----------|------------------|--|-----------------|--|

**Cancer characteristics**

## Laterality

|           |                     |       |                  |      |
|-----------|---------------------|-------|------------------|------|
| Right     | 0 (ref)             | 0.007 | 0 (ref)          | 0.27 |
| Left      | 0.3 (-0.8, 1.5)     |       | -0.3 (-0.8, 0.2) |      |
| Bilateral | -10.3 (-17.0, -3.6) |       | 1.4 (-1.5, 4.4)  |      |

## Cancer stage

|         |                      |        |                  |        |
|---------|----------------------|--------|------------------|--------|
| 0       | 13.5 (4.0, 23.0)     |        | 7.5 (3.2, 11.7)  |        |
| 1       | 0 (ref)              | <.0001 | 0 (ref)          | 0.0002 |
| 2       | -9.6 (-10.9, -8.3)   |        | 0.4 (-0.2, 1.0)  |        |
| 3       | -12.3 (-14.3, -10.4) |        | -0.5 (-1.4, 0.3) |        |
| 4       | -20.5 (-23.7, -17.3) |        | 1.5 (0.1, 2.9)   |        |
| Unknown | 9.8 (6.2, 13.4)      |        | 1.8 (0.2, 3.5)   |        |

## Hormone receptor profile

|                 |                   |       |                  |        |
|-----------------|-------------------|-------|------------------|--------|
| ER-, PR-, HER2- | 1.0 (ref)         | 0.002 | 0 (ref)          | <.0001 |
| ER-, PR-, HER2+ | 1.1 (-2.3, 4.5)   |       | -0.8 (-2.3, 0.7) |        |
| ER-, PR+, HER2- | -2.2 (-11.1, 6.7) |       | -1.7 (-5.7, 2.3) |        |
| ER-, PR+, HER2+ | 1.9 (-12.1, 15.9) |       | 0.4 (-5.7, 6.5)  |        |
| ER+, PR-, HER2- | 3.2 (0.2, 6.1)    |       | 0.4 (-0.9, 1.7)  |        |
| ER+, PR-, HER2+ | -2.4 (-6.5, 1.8)  |       | 0.7 (-1.1, 2.6)  |        |
| ER+, PR+, HER2- | 0.1 (-1.9, 2.2)   |       | 1.8 (0.8, 2.7)   |        |
| ER+, PR+, HER2+ | -1.5 (-4.5, 1.5)  |       | 0.8 (-0.6, 2.0)  |        |
| Missing         | 3.7 (1.1, 6.4)    |       | 1.8 (0.6, 3.0)   |        |

## Topography

|                      |                  |        |                   |        |
|----------------------|------------------|--------|-------------------|--------|
| Upper-outer quadrant | 0 (ref)          | <.0001 | 0 (ref)           | <.0001 |
| Overlapping lesion   | 1.9 (0.3, 3.6)   |        | 0.1 (-0.6, 0.8)   |        |
| Breast NOS           | 9.7 (7.4, 11.9)  |        | -3.1 (-4.2, -2.1) |        |
| Lower-outer quadrant | 1.0 (-1.1, 3.1)  |        | 0.2 (-0.8, 1.1)   |        |
| Upper-inner quadrant | -0.0 (-1.9, 1.8) |        | -0.1 (-0.9, 0.7)  |        |
| Lower-inner quadrant | 0.3 (-2.2, 2.9)  |        | 0.0 (-1.1, 1.2)   |        |
| Central portion      | 3.7 (1.0, 6.4)   |        | -1.3 (-2.5, -0.1) |        |
| Nipple               | 10.8 (6.7, 14.9) |        | 0.2 (-1.6, 2.0)   |        |
| Axillary tail        | 1.2 (-5.9, 8.3)  |        | 1.9 (-1.3, 5.1)   |        |

**Other characteristics**

## Year of diagnosis

|      |                   |        |                   |        |
|------|-------------------|--------|-------------------|--------|
| 2013 | 0 (ref)           | 0.0001 | 0 (ref)           | <.0001 |
| 2014 | -1.6 (-3.4, 0.3)  |        | -1.3 (-2.2, -0.5) |        |
| 2015 | -3.3 (-5.2, -1.5) |        | -2.0 (-2.9, -1.2) |        |
| 2016 | -4.1 (-6.0, -2.3) |        | -2.2 (-3.0, -1.4) |        |
| 2017 | -2.6 (-4.4, -0.7) |        | -2.1 (-2.9, -1.3) |        |

Beta coefficients reflect the effect of a 1-unit change in the patient/tumour characteristic on the duration of the time interval, in days.

<sup>a</sup> adjusted for O-BAS, screening status, age, neighbourhood income quintile, neighbourhood immigrant density, rurality, distance to the closest O-BAS, Charlson comorbidity index, prior breast cancer history, laterality, cancer stage, hormone receptor profile, topography, year of diagnosis and level of geography (Local Health Integration Network, LHIN).

<sup>b</sup> source: (or adapted from) Statistics Canada Postal Code Conversion File and Postal Code Conversion File Plus (June 2017) which is based on data licensed from Canada Post Corporation. The patients' postal code at diagnosis was used.

OR – odds ratio; CI – confidence interval; OBSP – Ontario Breast Screening Program; O-BAS – OBSP-affiliated Breast Assessment Site; GP – general practitioner; ER – estrogen receptor; PR – progesterone receptor; HER2 – human epidermal growth factor receptor-2; NOS – not otherwise specified

**Table 4: Healthcare utilization among non-O-BAS and O-BAS patients**

| Type of encounter <sup>a</sup>                                             | Non-O-BAS (N=8,862) |                                                      | O-BAS (N=42,598) |                                                      |
|----------------------------------------------------------------------------|---------------------|------------------------------------------------------|------------------|------------------------------------------------------|
|                                                                            | N (%)               | Median (IQR)<br>days until<br>diagnosis <sup>b</sup> | N (%)            | Median (IQR)<br>days until<br>diagnosis <sup>b</sup> |
| <b>Mammography</b>                                                         |                     |                                                      |                  |                                                      |
| Screening mammogram                                                        | 2683 (30%)          | 25 (14, 41)                                          | 18614 (44%)      | 23 (14, 39)                                          |
| Diagnostic mammogram (first)                                               | 6929 (78%)          | 14 (3, 28)                                           | 38708 (91%)      | 11 (0, 23)                                           |
| Diagnostic mammogram (second)                                              | 3726 (42%)          | 6 (-2, 20)                                           | 25585 (60%)      | 0 (0, 14)                                            |
| Diagnostic mammogram (third)                                               | 1360 (15%)          | 0 (-32, 0)                                           | 12509 (29%)      | 0 (-30, 0)                                           |
| Any mammogram                                                              | 7386 (83%)          | 17 (7, 34)                                           | 40858 (96%)      | 17 (7, 32)                                           |
| <b>Other imaging</b>                                                       |                     |                                                      |                  |                                                      |
| Breast ultrasound (first)                                                  | 7278 (82%)          | 8 (0, 20)                                            | 40155 (94%)      | 5 (0, 17)                                            |
| Breast ultrasound (second)                                                 | 7114 (80%)          | 12 (1, 23)                                           | 39736 (93%)      | 9 (0, 21)                                            |
| Breast ultrasound (third)                                                  | 3900 (44%)          | 0 (0, 1)                                             | 22379 (53%)      | 0 (0, 0)                                             |
| Abdominal/thoracic ultrasound                                              | 1832 (21%)          | 0 (-22, 43)                                          | 8129 (19%)       | -9 (-22, 47)                                         |
| Abdominal/thoracic computed tomography scan                                | 3368 (38%)          | -6 (-22, 9.5)                                        | 10547 (25%)      | -14 (-25, 0)                                         |
| Breast magnetic resonance imaging scan                                     | 1168 (13%)          | -20 (-31, -9)                                        | 9635 (23%)       | -14 (-24, -5)                                        |
| Abdominal/thoracic magnetic resonance imaging scan                         | 1739 (20%)          | -15 (-27, 2)                                         | 11250 (26%)      | -13 (-23, 0)                                         |
| Chest x-ray                                                                | 4300 (49%)          | 0 (-21, 40)                                          | 16738 (39%)      | -11 (-26, 35)                                        |
| <b>Biopsy</b>                                                              |                     |                                                      |                  |                                                      |
| Breast biopsy                                                              | 7543 (85%)          | 0 (0, 0)                                             | 41160 (97%)      | 0 (0, 0)                                             |
| Lymph node biopsy                                                          | 789 (9%)            | 0 (-11, 0)                                           | 3711 (9%)        | 0 (-5, 0)                                            |
| Any biopsy                                                                 | 7723 (87%)          | 0 (0, 0)                                             | 41804 (98%)      | 0 (0, 0)                                             |
| <b>Consultations and visits</b>                                            |                     |                                                      |                  |                                                      |
| General or general thoracic surgeon                                        | 7690 (87%)          | -1 (-14, 9)                                          | 41300 (97%)      | -8 (-16, 3)                                          |
| Cardiac surgery consult                                                    | 52 (<1%)            | 53 (-9, 121)                                         | 149 (<1%)        | 87 (7, 149)                                          |
| Dermatology consult                                                        | 556 (6%)            | 86 (22, 138)                                         | 3088 (7%)        | 84 (27, 140)                                         |
| Cardiology consult                                                         | 632 (7%)            | 55 (0.5, 128)                                        | 2619 (6%)        | 63 (-2, 127)                                         |
| General practitioner visit                                                 | 4337 (49%)          | 44 (3, 115)                                          | 17059 (40%)      | 59 (12, 123)                                         |
| Medical oncology consult                                                   | 2310 (26%)          | -22 (-36, -11)                                       | 6180 (15%)       | -19 (-30, -11)                                       |
| Internal medicine consult                                                  | 2131 (24%)          | 0 (-18, 81)                                          | 7529 (18%)       | 10 (-21, 104)                                        |
| Radiation oncology consult                                                 | 1443 (16%)          | -22 (-36, -10)                                       | 4117 (10%)       | -20 (-33, -10)                                       |
| <b>First visit</b>                                                         |                     |                                                      |                  |                                                      |
| Earliest of any of the above until diagnosis                               | 8056 (91%)          | 53 (20, 128)                                         | 39822 (94%)      | 49 (19, 125)                                         |
| Earliest of any of the above until diagnosis<br>(including diagnosis date) | 8862 (100%)         | 42 (14, 121)                                         | 42598 (100%)     | 42 (15, 119)                                         |
| Suspicion date until diagnosis                                             | 7788 (88%)          | 39 (20, 92)                                          | 40052 (94%)      | 35 (18, 79)                                          |

Healthcare encounter and timing of healthcare encounter relative to the diagnosis date from the Ontario Cancer Registry.

Encounters were included if they occurred within 6 months before diagnosis until the start of treatment (or 60 days after diagnosis if no treatment), inclusive

<sup>a</sup> encounters were identified using billing codes from the Ontario Health Insurance Program or procedural codes from the Discharge Abstract Database (inpatient) and the National Ambulatory Care Reporting System (outpatient)

<sup>b</sup> positive values indicate the encounter occurred before diagnosis; negative values indicate the encounter occurred after diagnosis

IQR – interquartile range (25<sup>th</sup>, 75<sup>th</sup> percentile)

**Table 5: Factors associated with all-cause mortality**

|                                                             | <b>Crude HR<br/>(95% CI)</b> | <b>p-value</b> | <b>Adjusted HR<br/>(95% CI)<sup>a</sup></b> | <b>p-value</b> |
|-------------------------------------------------------------|------------------------------|----------------|---------------------------------------------|----------------|
| O-BAS                                                       |                              |                |                                             |                |
| No                                                          | 1.0 (ref)                    | <.0001         | 1.0 (ref)                                   | <.0001         |
| Yes                                                         | 0.41 (0.39-0.43)             |                | 0.73 (0.69-0.78)                            |                |
| Screening status                                            |                              |                |                                             |                |
| Symptomatic                                                 | 1.0 (ref)                    | <.0001         | 1.0 (ref)                                   | <.0001         |
| OBSP-screened                                               | 0.30 (0.27-0.33)             |                | 0.73 (0.66-0.80)                            |                |
| GP-screened                                                 | 0.43 (0.40-0.46)             |                | 0.67 (0.62-0.72)                            |                |
| <b>Patient socio-demographic characteristics</b>            |                              |                |                                             |                |
| Age (continuous)                                            | 1.62 (1.59- 1.65)            | <.0001         | 1.48 (1.45-1.51)                            | <.0001         |
| Male sex                                                    | 2.29 (1.91- 2.74)            | <.0001         | 1.50 (1.24-1.82)                            | <.0001         |
| Neighbourhood income quintile <sup>b</sup>                  |                              |                |                                             |                |
| Highest                                                     | 1.0 (ref)                    | <.0001         | 1.0 (ref)                                   | <.0001         |
| Mid-high                                                    | 1.18 (1.09-1.28)             |                | 1.15 (1.06-1.25)                            |                |
| Middle                                                      | 1.29 (1.19-1.40)             |                | 1.18 (1.09-1.29)                            |                |
| Mid-low                                                     | 1.45 (1.34-1.56)             |                | 1.22 (1.12-1.32)                            |                |
| Lowest                                                      | 1.71 (1.58-1.84)             |                | 1.35 (1.25-1.46)                            |                |
| Neighbourhood immigrant density <sup>b</sup>                |                              |                |                                             |                |
| Least dense                                                 | 1.0 (ref)                    | <.0001         | 1.0 (ref)                                   | <.0001         |
| Mid-dense                                                   | 0.88 (0.83-0.93)             |                | 0.92 (0.85-0.96)                            |                |
| Most dense                                                  | 0.84 (0.79-0.90)             |                | 0.82 (0.76-0.89)                            |                |
| Rurality <sup>b</sup>                                       |                              |                |                                             |                |
| Urban                                                       | 1.0 (ref)                    | 0.04           | 1.0 (ref)                                   | 0.46           |
| Rural                                                       | 1.09 (1.00-1.16)             |                | 0.97 (0.89-1.06)                            |                |
| Distance to closest O-BAS,<br>per 100km                     | 1.17 (1.04-1.30)             | 0.008          | 0.92 (0.79-1.07)                            | 0.26           |
| <b>Patient clinical characteristics</b>                     |                              |                |                                             |                |
| Charlson comorbidity index                                  |                              |                |                                             |                |
| Missing                                                     | 0.73 (0.69-0.77)             |                | 0.87 (0.82-0.92)                            |                |
| 0                                                           | 1.0 (ref)                    | <.0001         | 1.0 (ref)                                   | <.0001         |
| 1                                                           | 1.75 (1.63-1.88)             |                | 1.33 (1.24-1.44)                            |                |
| 2                                                           | 2.79 (2.52-3.08)             |                | 1.66 (1.50-1.85)                            |                |
| 3+                                                          | 4.56 (4.15-5.02)             |                | 2.54 (2.30-2.81)                            |                |
| Prior breast cancer history relative to index diagnosis     |                              |                |                                             |                |
| Never                                                       | 1.0 (ref)                    | <.0001         | 1.0 (ref)                                   | <.0001         |
| ≥10 years prior                                             | 1.39 (1.26-1.53)             |                | 0.97 (0.88-1.08)                            |                |
| 5-10 years prior                                            | 1.55 (1.36-1.77)             |                | 1.09 (0.95-1.26)                            |                |
| ≤5 years prior                                              | 2.06 (1.68-2.52)             |                | 1.62 (1.32-1.99)                            |                |
| Prior non-breast cancer history relative to index diagnosis |                              |                |                                             |                |
| Never                                                       | 1.0 (ref)                    | <.0001         | 1.0 (ref)                                   | <.0001         |
| ≥10 years prior                                             | 1.74 (1.55-1.96)             |                | 1.26 (1.11-1.42)                            |                |
| 5-10 years prior                                            | 1.72 (1.47-2.01)             |                | 1.26 (1.08-1.48)                            |                |
| ≤5 years prior                                              | 2.26 (2.04-2.50)             |                | 1.61 (1.45-1.81)                            |                |
| <b>Cancer characteristics</b>                               |                              |                |                                             |                |

|    |                          |                  |        |                  |        |
|----|--------------------------|------------------|--------|------------------|--------|
| 1  |                          |                  |        |                  |        |
| 2  |                          |                  |        |                  |        |
| 3  | Laterality               |                  |        |                  |        |
| 4  | Right                    | 1.0 (ref)        | <.0001 | 1.0 (ref)        | 0.01   |
| 5  | Left                     | 1.00 (0.95-1.05) |        | 0.96 (0.91-1.01) |        |
| 6  | Bilateral                | 1.84 (1.50-2.27) |        | 1.28 (1.04-1.59) |        |
| 7  |                          |                  |        |                  |        |
| 8  | Cancer stage             |                  |        |                  |        |
| 9  | 0                        | 1.31 (0.79-2.18) |        | 1.02 (0.60-1.75) |        |
| 10 | 1                        | 1.0 (ref)        | <.0001 | 1.0 (ref)        | <.0001 |
| 11 | 2                        | 2.12 (1.97-2.28) |        | 1.79 (1.66-1.94) |        |
| 12 | 3                        | 4.62 (4.27-5.01) |        | 4.08 (3.75-4.43) |        |
| 13 | 4                        | 18.4 (17.0-19.9) |        | 13.1 (12.0-14.2) |        |
| 14 | Unknown                  | 7.68 (6.96-8.46) |        | 3.77 (3.35-4.24) |        |
| 15 | Hormone receptor profile |                  |        |                  |        |
| 16 | ER-, PR-, HER2-          | 1.0 (ref)        | <.0001 | 1.0 (ref)        | <.0001 |
| 17 | ER-, PR-, HER2+          | 0.62 (0.55-0.70) |        | 0.49 (0.43-0.56) |        |
| 18 | ER-, PR+, HER2-          | 1.07 (0.81-1.42) |        | 1.23 (0.93-1.63) |        |
| 19 | ER-, PR+, HER2+          | 0.76 (0.47-1.23) |        | 0.46 (0.28-0.74) |        |
| 20 | ER+, PR-, HER2-          | 0.76 (0.69-0.85) |        | 0.59 (0.53-0.65) |        |
| 21 | ER+, PR-, HER2+          | 0.64 (0.55-0.75) |        | 0.51 (0.43-0.60) |        |
| 22 | ER+, PR+, HER2-          | 0.40 (0.37-0.43) |        | 0.35 (0.33-0.39) |        |
| 23 | ER+, PR+, HER2+          | 0.42 (0.37-0.48) |        | 0.38 (0.34-0.43) |        |
| 24 | Missing                  | 0.95 (0.88-1.03) |        | 0.53 (0.49-0.58) |        |
| 25 | Topography               |                  |        |                  |        |
| 26 | Upper-outer quadrant     | 1.0 (ref)        | <.0001 | 1.0 (ref)        | <.0001 |
| 27 | Overlapping lesion       | 1.26 (1.18-1.36) |        | 1.09 (1.02-1.18) |        |
| 28 | Breast NOS               | 2.80 (2.61-3.01) |        | 1.39 (1.29-1.50) |        |
| 29 | Lower-outer quadrant     | 1.03 (0.94-1.14) |        | 1.05 (0.95-1.15) |        |
| 30 | Upper-inner quadrant     | 0.90 (0.83-0.98) |        | 0.96 (0.88-1.06) |        |
| 31 | Lower-inner quadrant     | 1.05 (0.93-1.17) |        | 1.03 (0.92-1.16) |        |
| 32 | Central portion          | 1.40 (1.26-1.55) |        | 1.04 (0.93-1.15) |        |
| 33 | Nipple                   | 1.28 (1.09-1.50) |        | 0.91 (0.77-1.08) |        |
| 34 | Axillary tail            | 2.37 (1.91-2.93) |        | 1.47 (1.18-1.83) |        |

<sup>a</sup> N=49,383 and 6402 events, all estimates are adjusted for O-BAS, screening status, age, neighbourhood income quintile, neighbourhood immigrant density, rurality, distance to the closest O-BAS, Charlson comorbidity index, prior breast cancer history, laterality, cancer stage, hormone receptor profile, topography, and year of diagnosis

<sup>b</sup> source: (or adapted from) Statistics Canada Postal Code Conversion File and Postal Code Conversion File Plus (June 2017) which is based on data licensed from Canada Post Corporation. The patients' postal code at diagnosis was used.

HR – hazard ratio; CI – confidence interval; OBSP – Ontario Breast Screening Program; O-BAS – OBSP-affiliated Breast Assessment Site; GP – general practitioner; ER – estrogen receptor; PR – progesterone receptor; HER2 – human epidermal growth factor receptor-2; NOS – not otherwise specified

# The efficiency and effectiveness of breast cancer diagnosis in Ontario: a case for reprioritizing symptomatic patients

Steven Habbous, PhD<sup>1</sup>, Esha Homenauth, MSc<sup>1</sup>, Andriana Barisic, MSc<sup>1</sup>, Sharmilaa Kandasamy, BSc<sup>1</sup>, Vicky Majpruz, MA<sup>1</sup>, Katharina Forster, PhD, MD<sup>1</sup>, Marta Yurcan, MHSc<sup>1</sup>, Anna M. Chiarelli, PhD<sup>1,2</sup>, Patti Groome, PhD<sup>3</sup>, Claire Holloway, PhD, MD<sup>1,4</sup>, Andrea Eisen, MD<sup>1,5</sup>

<sup>1</sup> Ontario Health (Cancer Care Ontario), Toronto, Ontario, Canada, M5G 2L3.

<sup>2</sup> Dalla Lana School of Public Health, University of Toronto, Toronto, Ontario, Canada, M5T 3M7

<sup>3</sup> Institute for Clinical Evaluative Sciences at Queen's University, Kingston Ontario, Canada, K7L 3L4.

<sup>4</sup> Department of Surgery, University of Toronto, Ontario, Canada, M5T1P5

<sup>5</sup> Department of Medical Oncology, Sunnybrook Health Sciences Centre, Toronto Ontario, Canada, M4Y 1H1.

**\*Corresponding author:**

Steven Habbous, PhD  
Ontario Health (Cancer Care Ontario)  
525 University Ave  
Toronto, ON, Canada  
M5G2L3  
[Steven.habbous@ontariohealth.ca](mailto:Steven.habbous@ontariohealth.ca)

**\*Funding:** No specific funding sources were used

**\*Conflicts:** All co-authors have no conflicts of interest to disclose.

**Words:** 29553,415

**Tables:** 5      **Figures:** 3

**Version date:** August 28, 2021

**Keywords:** Breast cancer; diagnosis; efficiency; wait-times; screening; symptomatic



## Abstract (words = 250)

**Introduction:** Most breast ~~ct-cancers~~ patients in Ontario are diagnosed through the Ontario Breast Screening Program (OBSP) ~~and its assessment sites~~ following an abnormal screen or follow-up of symptoms by ~~a~~ patients' primary care providers. During the diagnostic evaluation, patients may be referred to an OBSP-affiliated Breast Assessment Site (O-BAS), which includes patient navigators, ~~and necessary~~ personnel, and equipment to facilitate a timely and thorough diagnostic evaluation. Unlike OBSP-screened patients, there is no provincial oversight for the diagnostic evaluation of symptomatic patients.

**Methods:** Patients diagnosed with breast cancer from 2013-2017 were identified from the Ontario Cancer Registry. ~~By linking to other administrative databases, we explored the association of the route to diagnosis (screened or symptomatic) on referral use of to O-BAS, wait times until diagnosis or treatment, healthcare utilization patterns, and overall survival for patients with breast cancer. We assessed the effect of diagnosis at an O-BAS and presentation with symptoms on wait-times, patterns of healthcare utilization, and overall survival.~~

**Results:** ~~42,598/Of the~~ 51,460 (83%) of breast cancer patients identified, 83% were diagnosed at an O-BAS. OBSP-screen-detected patients were ~~significantly~~ more likely than symptomatic patients to be diagnosed at an O-BAS [adjusted odds ratio ~~1.68 (1.57-1.80)~~ 1.61 (1.49-1.74)]. O-BAS patients had significantly better overall survival than non-O-BAS patients [adjusted hazard ratio ~~0.73 (0.66-0.80)~~ 0.74 (0.69-0.80)]. OBSP-screen-detected patients were diagnosed 1 month quicker than symptomatic patients, but diagnosis at an O-BAS did not affect wait-times. ~~A longer interval between diagnosis and treatment was associated with better overall survival.~~

**Conclusion:** The efficiency and effectiveness of the OBSP has created a high-quality mechanism for screen-eligible patients to receive ~~a~~ timely breast cancer diagnosis and optimal care. Our findings suggest that individuals with signs and symptoms of breast cancer would benefit from the ~~organized- same~~ diagnostic assessment processes and standards employed by the ~~OBSP~~ organized screening program.

## Introduction

Breast cancer is the second most common malignancy, accounting for 12% of all cancers worldwide.<sup>1,2</sup> Thus, inefficiencies in care affects many patients and greatly impacts healthcare resources. An international collaborative effort found that patients in Ontario (Canada's largest province) had prolonged wait times for cancer diagnosis compared to select countries.<sup>3,4</sup> To address this variation, several jurisdictions in Canada and internationally have implemented initiatives to improve the route to cancer diagnosis.<sup>5</sup>

In an effort to improve the timeliness, efficiency, and outcomes of patients undergoing breast screening assessment for breast cancer, the Ontario Ministry of Health has supported Ontario Health (Cancer Care Ontario), which is responsible for the OBSP, to has designated facilities as OBSP-affiliated Breast Assessment Sites (O-BAS).<sup>6-8</sup> To qualify as a Breast Assessment Site O-BAS, facilities are required to have a patient navigation system that coordinates referrals through a defined clinical pathway and have access to diagnostic imaging, image-guided biopsies, and pathology, and surgical services.<sup>6-10</sup> Although these sites are affiliated with the Ontario Breast Screening Program (OBSP), hereby referred to as O-BAS, symptomatic women may also be referred to an O-BAS.

Pppatients diagnosed with breast cancer typically first engaged the healthcare system either through their primary care provider with symptomatic presentation of breast symptoms (most commonly a breast lump) or through screening mammography within received a screening test through the Ontario Breast Screening Program (OBSP).<sup>11,12</sup> This initial point of contact is a critical point of divergence for women entering the cancer system. Due to the relationship between the OBSP and O-BAS, we expect fewer symptomatic women to be diagnosed in an O-BAS. Moreover, we expect the diagnostic process to be less efficient for

## Optimizing care for symptomatic breast cancer patients

1  
2  
3 symptomatic women because the patients' general practitioner (GP) coordinates the diagnostic  
4 work-up.

5  
6  
7  
8       Regardless of whether a patient ~~was is~~ symptomatic or screened, ~~diagnostic~~  
9 ~~assessment should be sensitive (such that all cancers are identified) and specific (to avoid~~  
10 ~~overdiagnosis and overtreatment).~~ ~~The the~~ diagnostic assessment should ~~also~~ be efficient and  
11 accurate, following best practices and minimizing unnecessary tests.<sup>13</sup> ~~Further, t~~The time until  
12 diagnosis and treatment ~~should also be minimized to reduce is fraught with patient~~ anxiety for  
13 ~~the patient and during this stressful time~~ should be minimized whenever possible.<sup>14</sup> However,  
14 there is little evidence that shorter wait times result in improved clinical outcomes.<sup>7,8</sup>

15  
16  
17  
18  
19  
20  
21  
22  
23       ~~To improve the timeliness, efficiency, and outcomes of patients undergoing breast~~  
24 ~~screening, the Ontario Ministry of Health has supported Ontario Health (Cancer Care Ontario),~~  
25 ~~which is responsible for the OBSP, to designate OBSP-affiliated Breast Assessment Sites (O-~~  
26 ~~BAS).~~<sup>9-14</sup> ~~To qualify as an O-BAS, facilities are required to have a patient navigation system that~~  
27 ~~coordinates referrals through a defined clinical pathway and have access to diagnostic imaging,~~  
28 ~~image-guided biopsies, pathology, and surgical services.~~ In the present study, we explored the  
29 association of ~~O-BAS and~~ the route to diagnosis (screened or symptomatic) on referral  
30 utilization of O-BAS, wait times until diagnosis or treatment, referral rates to O-BAS,  
31 healthcare utilization, and overall survival for patients with breast cancer.

## Methods

### Cohort ascertainment

Adults (age 18+) with an incident invasive breast cancer diagnosis in Ontario between January 1, 2013 and December 31, 2017 (ICD-O-3 ~~topography code C50; ICD-O-D behavior code = 3~~) were identified using the Ontario Cancer Registry (OCR). We ~~restricted the cohort to~~ included patients ~~with who had~~ a valid Ontario health-insurance card number, an Ontario postal code, and ~~patients who accessed the healthcare system through~~ the Ontario Health Insurance Program (OHIP) within 1 year of the diagnosis date. We ~~also~~ omitted patients who had a death date before or on the diagnosis date, were diagnosed by autopsy, or had missing age or sex.

### ~~Classifying patients as S~~screened versus ~~and~~ symptomatic

~~The OBSP has operated since 1990 to deliver organized, population-based breast screening to eligible women ages 50-74.<sup>10</sup> Women are ineligible if they had a prior breast cancer, augmentation mammoplasty, or if they currently have acute breast symptoms. Although most women are screened biennially, those at increased breast cancer risk are screened annually. The OBSP was expanded in July 2011 to screen women age 30 to 69 years at high risk for breast cancer with annual digital mammography and MRI or screening breast ultrasound if MRI is contraindicated.<sup>11</sup> Women who meet at least one of the high-risk criteria are eligible even if they have a prior history of breast and/or other cancers, breast implants, or had a unilateral mastectomy.~~

~~The OBSP sites typically coordinate the diagnostic work-up for women with an abnormal screen (typically a mammogram) until cancer is diagnosed or ruled-out. The patients' general practitioner (GP) is apprised of the screening results, and in many cases is not required to make referrals for diagnostic tests. Data are collected for all OBSP-screened women through the Integrated Client Management System (ICMS), a database that is managed at Ontario Health~~

## Optimizing care for symptomatic breast cancer patients

(Cancer Care Ontario). To identify OBSP-screened women, the ICMS was used (Supplementary Figure S1). Patients may still be screened outside the auspices of the OBSP. This may include patients who are OBSP-ineligible (e.g. due to age), or receive interval screens (e.g. between the screening dates recommended by the OBSP). For these patients, but the patients' their GP coordinates the screening and assessment/ diagnostic processes. We therefore refer to these patients as "GP-screened". Patients were classified as "GP-screened" if they had a screening mammogram (OHIP billing codes X172 or X178) within  $\leq 12$  months prior to diagnosis and were not previously classified as OBSP-screened. The remaining patients were classified as "symptomatic", acknowledging that some of these may have been incidental asymptomatic cases. GP-screened and symptomatic patients may have been screened  $>12$  months prior through the OBSP, but this earlier screening was not the one that did not lead to result in a the present breast cancer diagnosis.

### Classifying patients as diagnosed at an O-BAS and non-OBAS

At the time of analysis, there were 72 O-BAS located throughout the province (Supplementary Table S1). Ontario facilities that provide organized assessment must have certified mammography technologists and equipment that meets or exceeds that specified by Canadian Association of Radiologist's Mammography Accreditation Program (CAR-MAP); provide all abnormal mammographic work-up, including special mammographic views and image-guided core biopsy; provide radiological, surgical and pathologic consultation with experts in breast evaluation; and provide navigation for patient support and coordination of referrals. O-BAS may either perform all the required services for abnormal mammographic work-up, or establish networks with facilities to provide the services.<sup>10,11</sup>

Patients may can be assessed at an O-BAS if symptomatic or screened, regardless of whether they were OBSP-screened, GP-screened, or symptomatic. However, but to support data collection O-BAS are remunerated by the OBSP \$100 per diagnostic assessment for OBSP-

1  
2  
3 screened women only, which mandates data collection through the ICMS. One of the data  
4 elements in the ICMS identifies whether an OBSP-screened patient was diagnosed at an O-  
5 BAS. In order to ascertain whether OBSP-screened patients underwent diagnostic assessment  
6 at an the O-BAS status for the ICMS only collects data on OBSP-screened women. To  
7 determine whether GP-screened and symptomatic patients were assessed at an O-BAS, we  
8 used the location of the patients' biopsy from billing data, OHIP, supplemented with the location  
9 of the patients' surgery (**Supplementary Table S1**).<sup>12,15</sup> Using the OBSP-screened cohort for  
10 validation, we achieved a sensitivity of 95% and a specificity of 80%.

### 11 12 13 14 15 16 17 18 19 20 21 **Healthcare utilization**

22  
23 We explored the frequency and timing of various diagnostic tests and consultations or visits with  
24 various healthcare providers 6 months before diagnosis until the date of first treatment. We  
25 searched the OHIP database (physician billing) database in addition to the hospital-based  
26 databases Discharge Abstract Database (DAD) and the National Ambulatory Care Reporting  
27 System (NACRS). Administrative codes are reported in **Supplementary Tables S2-3**.

### 28 29 30 31 32 33 34 35 **Diagnostic interval**

36  
37 We defined the diagnostic interval as the time from suspicion of breast cancer until the  
38 diagnosis date from the OCR. For screen-detected cancers, this is the suspicion date of  
39 corresponds to the screening mammogram and is derived identified either from the ICMS  
40 (OBSP-screened) or OHIP records (GP-screened patients). For symptomatic patients, we  
41 searched OHIP, DAD, and NACRS for any relevant diagnostic procedures, consults, and visits,  
42 and primary care referrals occurring within pre-specified look-back periods using.<sup>16</sup> The  
43 methodology suspicion date corresponds to the earliest healthcare encounter related to the  
44 breast cancer diagnosis, incorporating the time spent in primary care published elsewhere  
45 (Supplementary Tables S4).<sup>16,17</sup> ~~For screen-detected cancers, this is the date of the screening~~

## Optimizing care for symptomatic breast cancer patients

~~mammogram and is derived either from the ICMS (OBSP-screened) or OHIP (GP-screened patients). For symptomatic patients, we searched OHIP, DAD, and NACRS for any relevant diagnostic procedures, consults, and visits occurring within pre-specified look-back periods.<sup>18</sup>~~

**Pre-treatment interval**

We defined the pre-treatment interval as the time from diagnosis until treatment started using the earliest of breast resection. ~~We determined the date of first treatment using the earliest of breast cancer surgery (Supplementary Table S2), any anti-neoplastic systemic therapy, or chest radiation applied to the chest. Antineoplastic therapy was identified from Breast cancer surgery was defined using OHIP, DAD, or NACRS. Systemic therapy included chemotherapy, targeted therapy, or hormonal therapy captured in the Activity Level Reporting (ALR) database, the New Drug Funding Program database, or the Ontario Drug Benefits database.~~ Any antineoplastic therapy was also obtained from DAD, or and NACRS. Radiation was identified from ALR.

**Other covariates**

We used the Collaborative Staging database to identify overall cancer stage (AJCC 7<sup>th</sup> edition), and the tumors' estrogen receptor (ER), progesterone receptor (PR), and human epidermal growth factor receptor-2 (HER2) status. We used DAD and NACRS to estimate comorbidity using the Charlson Comorbidity Index with a window of 3 years before the diagnosis date, excluding cancer. ~~Patients with no hospital encounters within this window were considered to have no comorbidity (Supplementary Figure S2).<sup>18,19</sup> To obtain s~~ Sociodemographic characteristics were derived from the , we linked the patients' postal code at the time of diagnosis to the Census using the Postal Code Conversion FilePCCF+ (version 7BA for income and rurality; (version 6C was used for immigrant density). Health insurance numbers were used for linkage across databases. All databases employed are used for continuous system performance monitoring and undergo routine quality checks.

## Statistical methods

We present ~~the means~~ (standard deviation, SD), medians (interquartile range, IQR), and proportions, where appropriate. We used bivariate or multinomial logistic regression ~~or multinomial logistic regression~~ to compare factors between groups, reporting odds ratios (OR) and 95% confidence intervals (CI). We used linear regression to explore factors associated with wait-times, reporting beta coefficients and 95% CI, which represent the change in wait times (in days) per unit change in the covariate. Absence of heteroscedasticity was confirmed using the autoreg procedure. We used Cox proportional hazards regression to explore factors associated with all-cause mortality, reporting hazard ratios (HR) and 95% CI. Follow-up started at the time of diagnosis and ended at death or the last known healthcare encounter occurring on or before December 31, 2019. For OBSP-screen-detected cancer patients, lead-time bias was corrected by subtracting  $[1 - \exp(-\lambda t)] / \lambda$  from the survival time, where  $\lambda$  is the inverse of the mean sojourn time (2 years) and  $t$  is the survival time.<sup>20</sup> -The date of death was assigned using the OCR, supplemented with the Registered Persons Database. Unless otherwise stated, all multivariable models were adjusted for O-BAS status, screened/symptomatic presentation, age, sex, neighbourhood income quintile, neighbourhood immigrant density, rurality, Charlson comorbidity index, prior breast/non-breast cancer history, cancer laterality, cancer stage, hormone receptor profile, topography, and geography (Local Health Integration Network, LHIN). Proportionality was confirmed by visual inspection of Kaplan-Meier plots, log(-log) survival plots, and Loess-smoothed Schoenfeld residuals versus time. All analyses were performed using SAS version 9.4 (Cary, NC, SAS Institute Inc.). Statistical tests were two-sided and evaluated at a 5% significance level. All cells <6 were suppressed. Ethics approval was not required.

## Results



## Optimizing care for symptomatic breast cancer patients

A total 51,460 breast cancer patients were identified (**Supplementary Figure S3**). The mean age at diagnosis was ~~Patients were a mean~~ 63 (SD 13.7) years ~~of age at diagnosis~~, 86% had no comorbidity, 3,845 (7%) had a prior breast cancer and 42,598 (83%) were diagnosed in an O-BAS (**Table 1**). A total 28,107 (55%) were symptomatic, 13,615 (27%) were OBSP-screened, and 9,738 (19%) were GP-screened. ~~Most patients had stage 1 (n=21,218; 42%) or stage 2 (n=18,568; 37%) breast cancer.~~

**O-BAS vs. non-O-BAS**

After adjustment, O-BAS patients were more likely to be younger ~~[OR 0.86 (0.84-0.88) per 10 years]~~, have no comorbidities ( $p=0.0008$ ), live closer to an O-BAS ~~[OR 0.34 (0.29-0.41) per 100km]~~, and live in a higher-income urban neighbourhood ~~with the least immigrant density~~ ( $p<0.0001$  ~~for all for all~~) (**Table 1**). ~~The likelihood of being diagnosed in an O-BAS did not change over the study period (p=0.81). While there was no difference by disease laterality (p=0.32) or hormone receptor status (p=0.59), O-BAS patients were more likely to have had lower-stage breast cancers disease (p<0.0001), known hormone receptor status (p<0.0001), were more likely to have had a greater risk of a prior breast cancer (p=<0.00054), and were more likely to have had an screen-detected [been OBSP-screened cancer [OR 1.684 (1.4957-1.7480)] or ; or GP-screen-detected cancer [ed OR 1.49-31 (1.4023-1.2941)] than symptomatic than symptomatic cancer.~~

**OBSP-screened, GP-screened, versus symptomatic**

The proportion of ~~breast cancer~~ patients who were OBSP-screened increased from 23% in 2013 to 29% in 2017 with ~~a correspondingly decline in breast cancer fewer~~ patients presenting with symptoms (**Figure 1A**). ~~In a sensitivity analysis restricted to women aged 50-74 years with no prior breast cancer history (the OBSP-eligible cohort), we observed a similar increase over time,~~

~~but the proportion of women with breast cancer who were OBSP-screened surpassed the symptomatic group after 2014, reaching 44% by 2017 (Figure 1B).~~

Symptomatic patients were more likely to reside in a lower-income neighbourhood ( $p < 0.0001$ ), have greater comorbidity (~~76% versus 81% had no comorbidity~~  $p < 0.0001$ ), and have advanced-stage breast cancer than screened patients: 30% of symptomatic patients had stage 1 cancer compared with 47% of GP-screened and 64% of OBSP-screened patients (Table 2). ~~Although the majority of patients diagnosed with breast cancer were female, males were more likely to be symptomatic ( $p < 0.0001$ ).~~ Symptomatic patients were more likely to have biologically more aggressive disease: 18% had ER- tumors (versus 11% for OBSP-screened) and 18% had HER2+ tumors (versus 12% for OBSP-screened).

### The diagnostic interval

~~The date of suspicion was identifiable for 47,840 (93%) patients (Supplementary Table S4).~~

The diagnostic interval was a median 35 (IQR 19, 82) days. Diagnosis at an O-BAS did not reduce the diagnostic interval [beta ~~-2.0 (-3.7, -0.4)~~ ~~-1.6 (-3.4, 0.3)~~ days] (Table 3) ~~or~~. ~~We divided the diagnostic interval into~~ shorter sub-intervals (e.g. time from suspicion to first image test), ~~but little variability was observed between O-BAS and non-O-BAS patients (Supplementary Table S5).~~ In contrast, ~~stage was a significant predictor:~~ compared with stage 1, the diagnostic interval was 10, 12, 21, and 6-10 days shorter for patients with stage 2, 3, 4, and unknown stage, respectively ( $p < 0.0001$ ). Patients with bilateral breast cancer had a shorter diagnostic interval [beta ~~-10.3 (-17.0, -3.6)~~ ~~-9.9 (-17.7, -2.1)~~ days], as did males [beta ~~-13.0 (-19.7, -6.3)~~ ~~-11.1 (-18.7, -3.5)~~]. Compared with symptomatic patients, the diagnostic interval was 25 days shorter [beta ~~-24.8 (-26.3, -23.4)~~ ~~-25 (-27, -23)~~] for OBSP-screened patients and 6-5 days longer [beta 4.9 (3.3, 6.4) 6 (4, 7) days] for GP-screened patients. No other demographic and clinical factors were meaningfully associated with the length of the diagnostic interval.

### The pre-treatment interval

The first intervention provided was surgery for 40,652 (79%) and systemic therapy for 9,296 (18%) of patients. The pre-treatment interval was a median 34 (IQR 23, 47) days. After adjustment, there were no factors associated with a meaningful delay ~~>7 days~~ (Table 3).

### Healthcare utilization

Frequency: O-BAS patients were more likely to have received various diagnostic tests before treatment than non-O-BAS patients, including a diagnostic mammogram (91% versus 78%), screening mammogram (44% versus 30%), breast biopsy (97% versus 85%), breast ultrasound (94% versus 82%), and breast MRI (23% versus 13%) (Table 4). However, O-BAS patients were less likely than non-O-BAS patients to have had an abdominal/thoracic CT scan (25% versus 38%) and a chest x-ray (39% versus 49%). O-BAS patients were more likely than non-OBAS patients to have a consultation with a general surgeon or general thoracic surgeon (97% versus 87%), ~~but, Conversely, O-BAS patients~~ were less likely than non-O-BAS patients to visit their GP (40% versus 49%), ~~or~~ have a consultation with an internist (18% versus 24%), or medical oncologist (15% versus 26%).

Timing: ~~Before first treatment,~~ O-BAS patients had a consultation or visit with a general surgeon or general thoracic surgeon earlier than non-O-BAS patients (median 8 days versus 1 day before diagnosis) (Table 4). The time from diagnosis until consultation with a medical oncologist or radiation oncologist was longer, with a median 20 (11, 32) days and 21 (10, 34) days, respectively. ~~Seven percent of patients consulted with a dermatologist a median 84 (27, 140) days after diagnosis.~~

### Overall survival

Patients were followed a mean 42 (SD 21.5) months after diagnosis. After adjustment, patients diagnosed at an O-BAS had better overall survival than non-O-BAS patients [~~crude~~ HR 0.73 (0.69-0.78) 0.39 (0.37, 0.41)] (Table 5). After adjustment, overall survival was also better for patients diagnosed in an O-BAS [HR 0.74 (0.69-0.80)] and for patients who were either OBSP-screened [HR 0.73 (0.66-0.80) 0.47 (0.42-0.52)] or GP-screened [HR 0.67 (0.62-0.72) 0.69 (0.63-0.76)] versus symptomatic. Without adjustment, O-BAS had a larger impact on survival among symptomatic patients [HR 0.43 (0.41-0.45),  $p < 0.0001$ ], and GP-screened patients [HR 0.48 (0.41-0.56),  $p < 0.0001$ ] than OBSP-screened patients [HR 0.69 (0.55-0.88),  $p = 0.002$ ] ( $p$ -interaction = 0.0003) (Figure 2). In the adjusted model, the difference of the effect of O-BAS on overall survival was similar across patient types ( $p$ -interaction=0.9180): HR 0.73 (0.6769-0.7978),  $p < 0.0001$  for among symptomatic, HR 0.763 (0.62-0.9864),  $p = 0.00024$  among for GP-screened, and HR 0.752 (0.56-0.992),  $p = 0.0085$  among for OBSP-screened. Patients also had worse overall survival if they were older [HR 1.51 (1.48-1.55) per 10 years], lived in a lower-income neighborhood [HR 1.36 (1.23-1.50) for the lowest versus the highest], had greater comorbidity [HR 2.57 (2.28-2.90) for 3+ versus 0 comorbidity] or prior cancer history, had more advanced stage ( $p < 0.0001$ ), or had triple-negative disease ( $p < 0.0001$  for all) (Table 5).

We also explored whether wait times were associated with overall survival. After adjustment, a longer diagnostic interval was not associated with worse overall survival ( $p = 0.09$ ), nor was there evidence of a trend (Table 5). In contrast, a longer pre-treatment interval was associated with better overall survival ( $p < 0.0001$ ) with a gradient response until 8 weeks after diagnosis.

## Discussion

In this study, we found that ~~patients screened in an organized program~~ ~~OBSP-screened patients~~ had a faster time until diagnosis and were more likely to be referred to an O-BAS ~~than symptomatic patients~~. We also observed that attendance at an O-BAS was associated with improved overall survival ~~independently of wait-times, route to diagnosis, or stage~~.

As of 1998, the OBSP implemented a process where screened women can be directly referred for diagnostic follow-up (at an O-BAS or other assessment site) by the OBSP screening site responsible for that patient's work-up.<sup>9</sup> The main focus of this system-level change was to improve the coordination and quality of care for women screened through the OBSP. Our results demonstrate the success of this program, but similar improvements are needed for symptomatic patients for several reasons (**Figure 3**).<sup>21</sup> First, symptomatic patients exhibit features associated with worse prognosis, including older age at diagnosis, more advanced stage, and more biologically aggressive (~~e.g. undifferentiated~~) tumors.<sup>22–26</sup> O-BAS are high-volume centres that are equipped to manage complex patients and efficiently ~~render a diagnosis~~ ~~se patients with breast cancer~~.<sup>9,27</sup> Despite this, symptomatic patients were less likely to be diagnosed at an O-BAS (**Figure 3, a-c**). Second, a shorter time until treatment (diagnostic plus pre-treatment intervals) may be important for a subset of patient with more aggressive tumors.<sup>28</sup> Patients with fast-growing tumors are less likely to be screen-detected due to length time bias, so any effect of wait times on mortality is expected to be more ~~poignant~~ ~~impactful~~ ~~among the for~~ symptomatic patients, ~~yet~~.<sup>26,27</sup> ~~Despite this,~~ symptomatic patients had a longer time until diagnosis (**Figure 3, d-e**).<sup>29,30</sup> Third, anxiety during the diagnostic interval is high, and may be higher for patients with symptoms ~~than those without~~.<sup>14,31,32</sup> Thus, symptomatic patients ~~are expected to~~ ~~may again~~ derive ~~the greater~~ ~~rst~~ benefit from a shorter diagnostic interval. In addition, ~~patients are more likely to feel some comfort if there is less uncertainty around their symptoms~~. ~~With~~ comprehensive data collection for the OBSP-screened population, patients

1  
2  
3 can learn about their risk of having cancer given an abnormal screen. There is no parallel for ~~the~~  
4 symptomatic patients who, arguably, may need this type of information more urgently than  
5 asymptomatic women do (**Figure 3, e-g**).<sup>33,34</sup>  
6  
7  
8  
9

10 The OBSP requires that O-BAS adhere to ~~the~~ requirements outlined in its standard  
11 operating procedures, ~~including quality standards and wait-time targets~~.<sup>17,35</sup> Additionally, O-BAS  
12 are required to develop mechanisms for ongoing evaluation and quality improvement, and to  
13 implement processes to notify the referring physician of abnormal test results, recommendations  
14 for biopsy, and the diagnosis ~~reached~~. However, approximately 74% of all breast cancer cases  
15 are diagnosed outside the auspices of the ~~OBSP-organized screening program (GP-screened or~~  
16 ~~symptomatic), and as such, and~~ are therefore not subject to those same standards, reporting,  
17 and performance management requirements. Funneling symptomatic patients through an the  
18 OBSP-organized system is therefore expected to improve clinical and patient-reported  
19 outcomes, and provide data necessary to inform quality improvement. ~~At the population level,~~  
20 ~~this is expected to have a large impact on system performance.~~  
21  
22  
23  
24  
25  
26  
27  
28  
29  
30  
31  
32  
33

34 ~~Our findings support extending the OBSP-organized screening program referral~~  
35 ~~pathways and resources to include symptomatic patients. Although this subpopulation~~  
36 ~~comprises 74% of all breast cancer diagnoses, We suspect~~ the existing O-BAS likely have the  
37 capacity to evaluate these patients because by 2017, 79% of all symptomatic breast cancer  
38 patients in the province were diagnosed at an O-BAS (this estimate has increased since the  
39 time of writing as more centres have become O-BAS). While it remains unknown how many  
40 symptomatic patients without breast cancer are assessed at an O-BAS, we suspect that O-BAS  
41 are also ruling-out cancer in many of these patients because: 1) the likelihood of a cancer  
42 diagnosis is higher if symptoms are present; 2) the need for a diagnostic biopsy is more likely  
43 for symptomatic patients; and 3) O-BAS are more likely to have the ability to perform a biopsy  
44 than non-O-BAS.<sup>11,36</sup> It remains possible that increased referrals to O-BAS will result in capacity  
45  
46  
47  
48  
49  
50  
51  
52  
53  
54  
55  
56  
57  
58  
59  
60

## Optimizing care for symptomatic breast cancer patients

constraints and prolonged wait-times. This should be considered when designing system-level changes to the diagnostic process for symptomatic women. However, a more standardized diagnostic assessment pathway may also reduce repeated imaging and unnecessary testing, which is also expected to reduce costs.<sup>37</sup> A 2018 environmental scan of national and regional cancer diagnostic improvement initiatives described ~~reported costs and cost savings, but formal cost effectiveness analyses were not available.~~<sup>5</sup> Such analyses should be considered prior to full implementation of O-BAS.

Our results support that symptomatic patients should receive more streamlined care aligned with the OBSP screening practices, despite some limitations. ~~One limitation of this study is the risk of misclassification~~ First, there may be some misclassification of GP-screened ~~cancers patients~~ (e.g. some may have been symptomatic) and symptomatic ~~cancers patients~~ (e.g. some may have been ~~incidental but incidental findings~~ ~~ssly diagnosed~~). However, the demographic, clinical, and tumor characteristics of the GP-screened group was in-between that of the OBSP-screened and symptomatic groups, suggesting that this misclassification is small. Further, the rate of incidental breast cancer detection is believed to be low ~~and is unlikely to alter our conclusions.~~<sup>38-40</sup> Second, the gold standard definition of O-BAS (~~from the ICMS~~) is imperfect: it reflects the institution that renders the diagnosis, which may differ from the institution conducting the remainder of the diagnostic work-up. Also, there are some institutions that ~~behave function~~ like an O-BAS (e.g. have all the necessary equipment and personnel), but they do not have patient navigation or a funding agreement with the OBSP. ~~Therefore these~~ ~~These~~ centres were classified as non-O-BAS, despite ~~potentially functioning like~~ ~~having some~~ an O-BAS ~~features~~. ~~Third, although males diagnosed with breast cancer had significantly worse overall survival than females, results may not generalize to this group.~~ ~~Fourth~~ ~~Third~~, patients with prior breast cancers had a significantly longer diagnostic interval than those who did not. However, because the suspicion algorithm was developed in a cohort of first-ever

## Optimizing care for symptomatic breast cancer patients

breast cancer patients, it may not be generalizable to valid in this subgroup of patients.<sup>16,17</sup>

Nevertheless, findings from a recent systematic review recommend that patients with a prior history of breast cancer be included in screening programs (even if not high-risk), a conclusion that is supported by our findings.<sup>41</sup> Fourth, information on sociodemographic factors were limited to neighbourhood-level classification rather than individual-level, which may result in misclassification on estimates of income and immigrant density. Fifth, our results may not generalize to certain patient groups, like males. scenarios. For example, results may not generalize to males because breast cancer may be considered an entirely different entity compared with females. Further, our results may not generalize to patients who are diagnosed with ductal carcinoma *in situ*, which was out-of-scope in the present analysis because it is generally asymptomatic. The small number of patients classified as stage 0 are likely misclassified. Lastly/Finally, our results may not generalize to other jurisdictions that do not have organized screening programs or have a designated referral stream for symptomatic women. While other provinces in Canada have organized screening programs, we are unaware of any provincial-level assessment programs designated for symptomatic women.<sup>37,42,43</sup> Reviews of the literature related to symptomatic presentation often focus only on wait-times as a measure of performance.<sup>44,45</sup>

In conclusion, the efficiency and effectiveness of the OBSP referral patterns has created a high-quality mechanism for screen-eligible patients to receive a timely breast cancer diagnosis and optimal care. Our findings suggest that all individuals with signs and symptoms of breast cancer would benefit from the organized, high-quality diagnostic assessment processes and standards like those employed by the OBSP. There exists-is a clear need to leverage the existing infrastructure of the OBSP and extend provincial oversight and performance monitoring for all individuals undergoing breast cancer assessment for a possible cancer diagnosis. relevant of the current pandemic organized screening in Ontario<sup>46</sup>



## Acknowledgements

We thank Julia Gao, Gabriela Espino-Hernandez, and Natasha Gray (Cancer Screening, Ontario Health) for their expertise and guidance to navigate the ICMS data and for their comments on the study.

## Data Source Acknowledgements

Parts of this material are based on data and information compiled and provided by the Canadian Institute for Health Information (CIHI). However, the analyses, conclusions, opinions and statements expressed herein are those of the author, and not necessarily those of CIHI.

We acknowledge the support of the Ontario Ministry of Health. The views expressed in this report are those of the authors and do not necessarily reflect those of Ontario or the Ministry.

We acknowledge the Ministry of Government and Consumer Services (MCGS) as the original source of death data. The views expressed in this report are those of the authors and do not necessarily reflect those of the MCGS.

This study was supported by the Institute for Clinical Evaluative Sciences (ICES), which is funded by an annual grant from the Ontario Ministry of Health and Long-Term Care (MOHLTC). The opinions, results and conclusions reported in this paper are those of the authors and are independent from the funding sources. No endorsement by ICES or the Ontario MOHLTC is intended or should be inferred.

**Data availability statement:** Ontario Health is prohibited from making the data used in this research publicly accessible if it includes potentially identifiable personal health information and/or personal information as defined in Ontario law, specifically the Personal Health Information Protection Act (PHIPA) and the Freedom of Information and Protection of Privacy Act (FIPPA). Upon request, data de-identified to a level suitable for public release may be provided.

## References

1. Bray F, Ferlay J, Soerjomataram I, Siegel RL, Torre LA, Jemal A. Global cancer statistics 2018: GLOBOCAN estimates of incidence and mortality worldwide for 36 cancers in 185 countries. *CA Cancer J Clin.* 2018;68(6):394-424. doi:10.3322/caac.21492
2. Ontario Cancer Statistics 2020. <https://www.cancercareontario.ca/en/statistical-reports/ontario-cancer-statistics-2020/ch-1-estimated-current-cancer-incidence>. Published 2020. Accessed November 11, 2020.
3. Menon U, Vedsted P, Zalounina Falborg A, et al. Time intervals and routes to diagnosis for lung cancer in 10 jurisdictions: cross-sectional study findings from the International Cancer Benchmarking Partnership (ICBP). *BMJ Open.* 2019;9(11):e025895. doi:10.1136/bmjopen-2018-025895
4. Weller D, Menon U, Falborg AZ, et al. Diagnostic routes and time intervals for patients

- with colorectal cancer in 10 international jurisdictions; findings from a cross-sectional study from the International Cancer Benchmarking Partnership (ICBP). *BMJ Open*. 2018;8(11):e023870. doi:10.1136/BMJOPEN-2018-023870
5. Pollock M, Craig R, Chojecki D, Guo B. *Initiatives to Accelerate the Diagnostic Phase of Cancer Care: An Environmental Scan*.; 2018. <https://www.ihe.ca/publications/initiatives-to-accelerate-the-diagnostic-phase-of-cancer-care-an-environmental-scan>. Accessed August 28, 2021.
  6. Hendrick RE, Helvie MA. Mammography Screening: A New Estimate of Number Needed to Screen to Prevent One Breast Cancer Death. *Am J Roentgenol*. 2012;198(3):723-728. doi:10.2214/AJR.11.7146
  7. Hendrick RE, Helvie MA. United States Preventive Services Task Force Screening Mammography Recommendations: Science Ignored. *Am J Roentgenol*. 2011;196(2):W112-W116. doi:10.2214/AJR.10.5609
  8. Webber C, Whitehead M, Eisen A, Holloway CM. Breast cancer diagnosis and treatment wait times in specialized diagnostic units compared with usual care: a population-based study. *Curr Oncol*. 2020;27(4):e377-e385. doi:<https://doi.org/10.3747/co.27.6115>
  9. Chiarelli AM, Muradali D, Blackmore KM, et al. Evaluating wait times from screening to breast cancer diagnosis among women undergoing organised assessment vs usual care. *Br J Cancer*. 2017;116(10):1254-1263. doi:10.1038/bjc.2017.87
  10. Quan ML, Shumak RS, Majpruz V, Holloway CMD, O'Malley FP, Chiarelli AM. Improving work-up of the abnormal mammogram through organized assessment: results from the ontario breast screening program. *J Oncol Pract*. 2012;8(2):107-112. doi:10.1200/JOP.2011.000413
  11. Koo MM, von Wagner C, Abel GA, McPhail S, Rubin GP, Lyrtzopoulos G. Typical and atypical presenting symptoms of breast cancer and their associations with diagnostic intervals: Evidence from a national audit of cancer diagnosis. *Cancer Epidemiol*. 2017;48:140-146. doi:10.1016/j.canep.2017.04.010
  12. Jiang L, Gilbert J, Langley H, Moineddin R, Groome PA. Breast cancer detection method, diagnostic interval and use of specialized diagnostic assessment units across Ontario, Canada. *Heal Promot Chronic Dis Prev Can*. 2018;38(10):358-367. doi:10.24095/hpcdp.38.10.02
  13. Breast Cancer Pathway Map | Cancer Care Ontario. <https://www.cancercareontario.ca/en/pathwaymap/breast-cancer-pathway-map>. Accessed August 31, 2020.
  14. Montgomery M, McCrone SH. Psychological distress associated with the diagnostic phase for suspected breast cancer: systematic review. *J Adv Nurs*. 2010;66(11):2372-2390. doi:10.1111/j.1365-2648.2010.05439.x
  15. Jiang L, Gilbert J, Langley H, Moineddin R, Groome PA. Is being diagnosed at a dedicated breast assessment unit associated with a reduction in the time to diagnosis for symptomatic breast cancer patients? *Eur J Cancer Care (Engl)*. 2018;27(4):e12864. doi:10.1111/ecc.12864
  16. Groome PA, Webber C, Whitehead M, et al. Determining the Cancer Diagnostic Interval Using Administrative Health Care Data in a Breast Cancer Cohort. *JCO Clin cancer*

## Optimizing care for symptomatic breast cancer patients

- informatics. 2019;3:1-10. doi:10.1200/CCI.18.00131
17. Jiang L, Gilbert J, Langley H, Moineddin R, Groome PA. Effect of specialized diagnostic assessment units on the time to diagnosis in screen-detected breast cancer patients. *Br J Cancer*. 2015;112(11):1744-1750. doi:10.1038/bjc.2015.147
  18. Kilgore ML, Smith W, Curtis JR, et al. Evaluating Comorbidity Scores Based on Health Service Expenditures. *Medicare Medicaid Res Rev*. 2012;2(3). doi:10.5600/MMRR.002.03.A05
  19. TA D, N C, DC C, JM Y. Look back for the Charlson Index did not improve risk adjustment of cancer surgical outcomes. *J Clin Epidemiol*. 2015;68(4):379-386. doi:10.1016/J.JCLINEPI.2014.12.002
  20. SW D, ID N, M W, et al. Correcting for lead time and length bias in estimating the effect of screen detection on cancer survival. *Am J Epidemiol*. 2008;168(1):98-104. doi:10.1093/AJE/KWN120
  21. Raine R, Or Z, Prady S, Bevan G. Evaluating health-care equity. 2016. doi:10.3310/HSDR04160-69
  22. Esserman LJ, Shieh Y, Rutgers EJT, et al. Impact of mammographic screening on the detection of good and poor prognosis breast cancers. *Breast Cancer Res Treat*. 2011;130(3):725-734. doi:10.1007/s10549-011-1748-z
  23. Drukker CA, Schmidt MK, Rutgers EJT, et al. Mammographic screening detects low-risk tumor biology breast cancers. *Breast Cancer Res Treat*. 2014;144(1):103-111. doi:10.1007/s10549-013-2830-5
  24. Pálka I, Kelemen G, Ormándi K, et al. Tumor characteristics in screen-detected and symptomatic breast cancers. *Pathol Oncol Res*. 2008;14(2):161-167. doi:10.1007/s12253-008-9010-7
  25. Lawrence G, Wallis M, Allgood P, et al. Population estimates of survival in women with screen-detected and symptomatic breast cancer taking account of lead time and length bias. *Breast Cancer Res Treat*. 2009;116(1):179-185. doi:10.1007/s10549-008-0100-8
  26. Duffy SW, Tabár L, Chen HH, et al. The impact of organized mammography service screening on breast carcinoma mortality in seven Swedish Counties: A collaborative evaluation. *Cancer*. 2002;95(3):458-469. doi:10.1002/cncr.10765
  27. Vrijens F, Stordeur S, Beirens K, Devriese S, Van Eycken E, Vlayen J. Effect of hospital volume on processes of care and 5-year survival after breast cancer: a population-based study on 25000 women. *Breast*. 2012;21(3):261-266. doi:10.1016/j.breast.2011.12.002
  28. Förnvik D, Lång K, Andersson I, Dustler M, Borgquist S, Timberg P. Estimates of breast cancer growth rate from mammograms and its relation to tumour characteristics. *Radiat Prot Dosimetry*. 2016;169(1):151-157. doi:10.1093/rpd/ncv417
  29. Cox B, Sneyd MJ. Bias in breast cancer research in the screening era. *Breast*. 2013;22(6):1041-1045. doi:10.1016/j.breast.2013.07.046
  30. Caplan L. Delay in breast cancer: Implications for stage at diagnosis and survival. *Front Public Heal*. 2014;2(JUL). doi:10.3389/fpubh.2014.00087
  31. Murphy PJ, Marlow LA V., Waller J, Vrinten C. What is it about a cancer diagnosis that

- would worry people? A population-based survey of adults in England. *BMC Cancer*. 2018;18(1):86. doi:10.1186/s12885-017-3963-4
32. Balasooriya-Smeekens C, Walter FM, Scott S. The role of emotions in time to presentation for symptoms suggestive of cancer: A systematic literature review of quantitative studies. *Psychooncology*. 2015;24(12):1594-1604. doi:10.1002/pon.3833
33. Birrell J, Meares K, Wilkinson A, Freeston M. Toward a definition of intolerance of uncertainty: A review of factor analytical studies of the Intolerance of Uncertainty Scale. *Clin Psychol Rev*. 2011;31(7):1198-1208. doi:10.1016/j.cpr.2011.07.009
34. Tan H-J, Marks LS, Hoyt MA, et al. The Relationship between Intolerance of Uncertainty and Anxiety in Men on Active Surveillance for Prostate Cancer. *J Urol*. 2016;195(6):1724-1730. doi:10.1016/j.juro.2016.01.108
35. Eisen A, Blackmore KM, Meschino WS, et al. Genetic assessment wait time indicators in the High Risk Ontario Breast Screening Program. *Mol Genet Genomic Med*. 2018;6(2):213-223. doi:10.1002/mgg3.359
36. Singh D, Malila N, Pokhrel A, Anttila A. Association of symptoms and breast cancer in population-based mammography screening in Finland. *Int J Cancer*. 2015;136(6):E630-E637. doi:10.1002/ijc.29170
37. IA O, L K, D M, S K. Screening Mammography Program of British Columbia: pattern of use and health care system costs. *CMAJ*. 1999;160(3):337-341. <https://pubmed.ncbi.nlm.nih.gov/10065075/>. Accessed August 28, 2021.
38. Healey TT, Agarwal S, Patel R, Ratanaprasatporn L, Ratanaprasatporn L, Lourenco AP. Cancer Yield of Incidental Breast Lesions Detected on Chest Computed Tomography. *J Comput Assist Tomogr*. 2018;42(3):453-456. doi:10.1097/RCT.0000000000000696
39. Benveniste AP, Marom EM, Benveniste MF, Mawlawi O, Fox PS, Yang W. Incidental primary breast cancer detected on PET-CT. *Breast Cancer Res Treat*. 2015;151(2):261-268. doi:10.1007/s10549-015-3402-7
40. Prabhu V, Chhor CM, Ego-Osuala IO, Xiao JM, Hindman NM, Rosenkrantz AB. Frequency and Outcomes of Incidental Breast Lesions Detected on Abdominal MRI Over a 7-Year Period. *AJR Am J Roentgenol*. 2017;208(1):107-113. doi:10.2214/AJR.16.16683
41. Muradali D, Kennedy EB, Eisen A, Holloway CMB, Smith CR, Chiarelli AM. Breast screening for survivors of breast cancer: A systematic review. *Prev Med (Baltim)*. 2017;103:70-75. doi:10.1016/j.ypmed.2017.07.026
42. AB M, C W, C J B, P S, T T, SA N. Twenty five year follow-up for breast cancer incidence and mortality of the Canadian National Breast Screening Study: randomised screening trial. *BMJ*. 2014;348. doi:10.1136/BMJ.G366
43. Y Y, K V, Y S, J D, M W. Importance of quality in breast cancer screening practice - a natural experiment in Alberta, Canada. *BMJ Open*. 2020;10(1). doi:10.1136/BMJOPEN-2018-028766
44. Webber C, Jiang L, Grunfeld E, Groome PA. Identifying predictors of delayed diagnoses in symptomatic breast cancer: a scoping review. *Eur J Cancer Care (Engl)*. 2017;26(2). doi:10.1111/ECC.12483

Optimizing care for symptomatic breast cancer patients

- 45. J J, V O, F B, et al. Delays in diagnosis and treatment of breast cancer: a multinational analysis. *Eur J Public Health*. 2014;24(5):761-767. doi:10.1093/EURPUB/CKT131
- 46. MJ W, O M, J G, et al. Measuring the impact of the COVID-19 pandemic on organized cancer screening and diagnostic follow-up care in Ontario, Canada: A provincial, population-based study. *Prev Med (Baltim)*. 2021;151:106586. doi:10.1016/J.YPMED.2021.106586

Confidential

## Supplementary figures

**Figure S1:** Classification of patients as OBSP-screen-detected, GP-screened, or symptomatic. Patients were classified as OBSP-screened if their cancer diagnosis in the Ontario Cancer Registry was associated with a cancer diagnosis detected from the OBSP database. All remaining patients (non-OBSP-screened) were considered to have been screened by their general provider (GP-screened) if they had a screening mammogram within 1 year of diagnosis. All remaining patients were classified as symptomatic.

OBPS – Ontario Breast Screening Program; O-BAS – OBSP-affiliated breast assessment site; ICMS - Integrated Client Management System (database that tracks OBSP-screened clients)

**Supplementary Figure S2:** Rationale for classifying missing comorbidity as no comorbidity using overall survival as an outcome indicator.

**Supplementary Figure S3:** Patient selection. OHIP – Ontario Health Insurance Plan database.

## Supplementary tables

**Supplementary Table S1:** List of institutions and associated institution numbers of O-BAS at the time of analysis. The assessment centre start date is the date the institution became affiliated with the OBSP (e.g. met the criteria to be considered an O-BAS and a funding agreement was enacted with the Ontario Ministry of Health). OBPS – Ontario Breast Screening Program; O-BAS – OBSP-affiliated breast assessment site

**Supplementary Table S2:** Administrative codes to identify the date of surgery.

**Supplementary Table S3:** Administrative codes to identify the date of various diagnostic tests, consultations and visits, and imaging.

**Supplementary Table S4:** Healthcare encounters observed the suspicion date. If multiple encounters (e.g. diagnostic tests or consults) were observed on this date, the one chosen was based on a hierarchy.

**Supplementary Table S5:** Length of various subintervals measured between the date of suspicion and the date treatment started.

**Supplementary Figure S1: Categorization of patients as OBSP-screen-detected, GP-screened, or symptomatic**

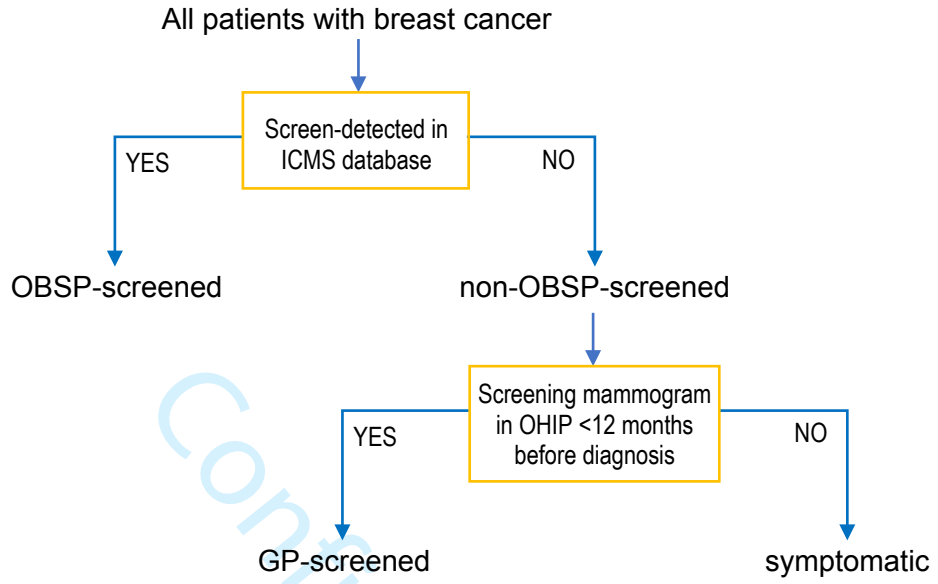

Confidential

1  
2  
3  
4  
5  
6  
7  
8  
9  
10  
11  
12  
13  
14  
15  
16  
17  
18  
19  
20  
21  
22  
23  
24  
25  
26  
27  
28  
29  
30  
31  
32  
33  
34  
35  
36  
37  
38  
39  
40  
41  
42  
43  
44  
45  
46  
47  
48  
49  
50  
51  
52  
53  
54  
55  
56  
57  
58  
59  
60

### Supplementary Figure S2: Kaplan-Meier plot for overall survival by Charlson comorbidity score

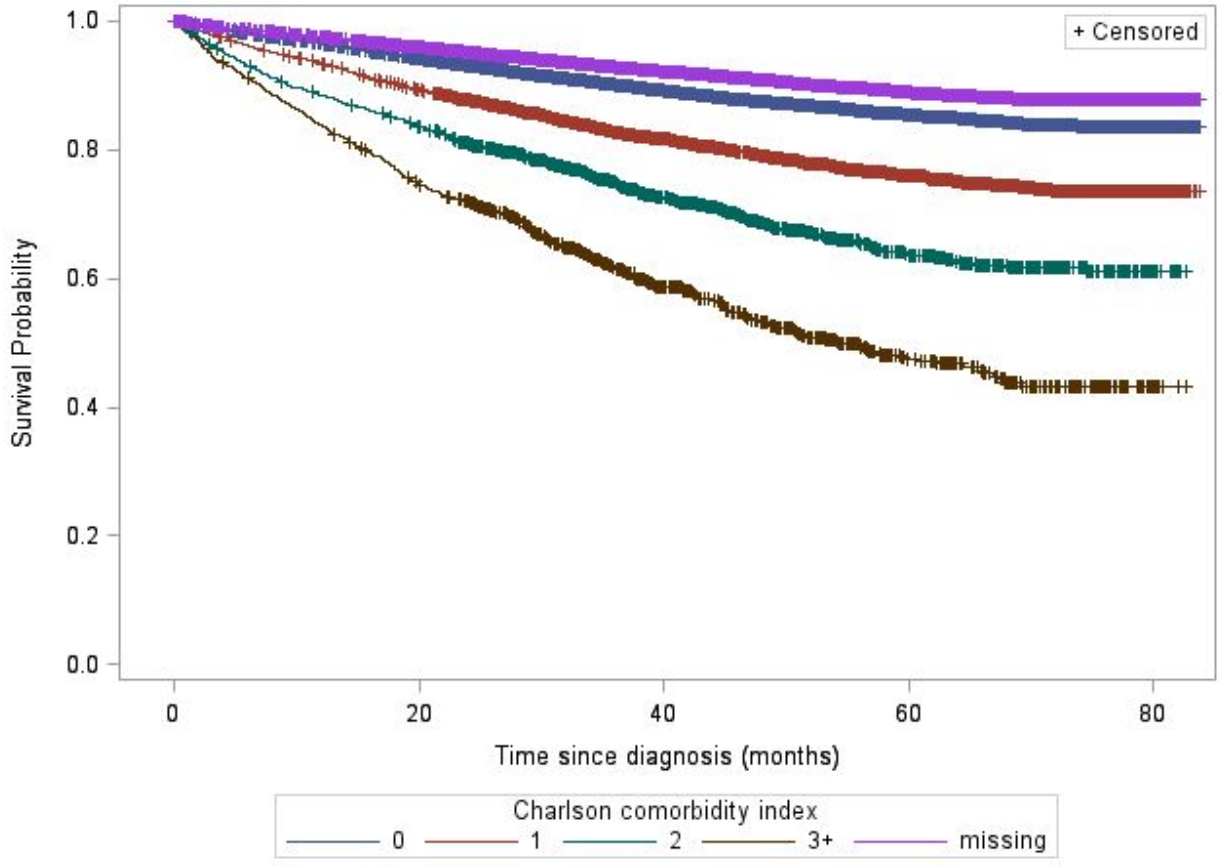



## Supplementary Figure S3: Patient selection

Number of unique patients with a breast cancer diagnosis between 2013 and 2017 (ICD-O-3 topography code C50; ICD-O-D behavior code = 3) (N=52,642)\*

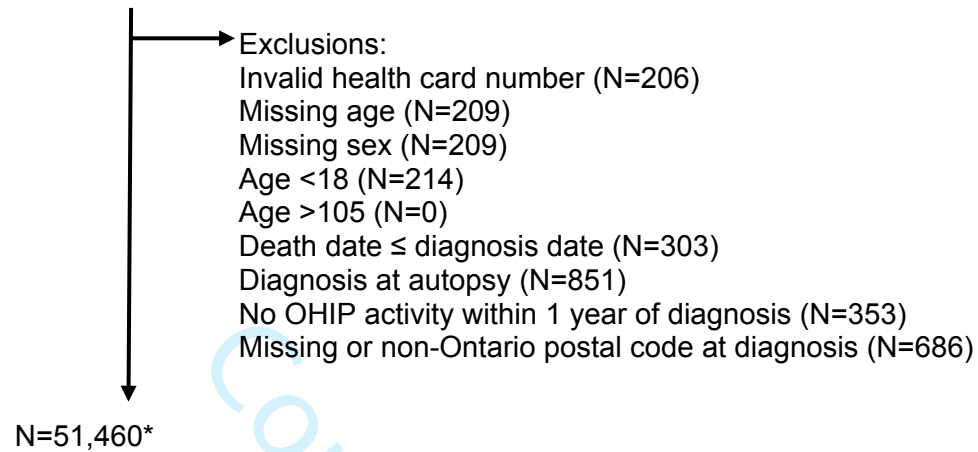

\*Cohort includes only unique patients.

1. For patients with bilateral breast cancer on the same day (i.e. same histology, same diagnosis date) and different laterality, we created a 'bilateral' flag for these patients and kept their record with the higher stage
2. If patient had multiple primaries during time period, we kept their earliest record.

## Supplementary Table S1: List of Ontario Breast Screening Program (OBSP)-affiliated Breast Assessment Sites (O-BAS)

Ontario facilities designated as an O-BAS that provide organized assessment must have certified mammography technologists and equipment that meets or exceeds that specified by Canadian Association of Radiologist's Mammography Accreditation Program (CAR-MAP); provide all abnormal mammographic work-up, including special mammographic views and image-guided core biopsy; provide radiological, surgical and pathologic consultation with experts in breast evaluation; and provide navigation for patient support and coordination of referrals.

To determine whether GP-screened and symptomatic patients were assessed at an O-BAS, we used the location of the patients' biopsy from billing data, supplemented with the location of the patients' surgery.<sup>12,15</sup> Using the OBSP-screened cohort for validation of this approach, we achieved a sensitivity of 95% and a specificity of 80% for the O-BAS designation.

| Clinic Name                                     | Assessment Centre Start Date | Institution Numbers |
|-------------------------------------------------|------------------------------|---------------------|
| Ottawa Hospital - Civic Campus                  | October 29, 1998             | 4046; 4079          |
| Listowel Memorial Hospital                      | November 1, 1999             | 1740                |
| Timmins and District Hospital                   | January 1, 2000              | 3414; 4123          |
| Health Sciences North                           | October 15, 2000             | 4059; 4063          |
| Renfrew Victoria Hospital                       | March 1, 2001                | 1813; 4184          |
| Hotel Dieu Hospital                             | July 1, 2001                 | 4106; 4105          |
| St. Joseph's Hospital (London)                  | March 1, 2002                | 1497; 4255          |
| Pembroke Regional Hospital                      | March 15, 2002               | 1804; 4071          |
| Greater Niagara General Hospital                | April 1, 2002                | 3982; 4213          |
| St. Catharine's General Hospital                | April 1, 2002                | 4045; 4224          |
| Welland County General Hospital                 | April 1, 2002                | 3978; 4227          |
| St. Michael's Hospital                          | August 1, 2002               | 1444; 3985          |
| Dixie X-Ray Associates - Finch                  | March 10, 2003               | N/A                 |
| Winchester District Memorial Hospital           | April 4, 2003                | 4267                |
| Grey Bruce Health Services - Owen Sound         | October 20, 2003             | 3944; 4131          |
| St. Joseph's Healthcare Hamilton - King Campus  | November 20, 2003            | N/A                 |
| Windsor Regional Hospital - Metropolitan Campus | January 26, 2004             | 1079; 4414          |
| Stratford General Hospital                      | October 5, 2004              | 1754; 4168          |

1  
2  
3  
4  
5  
6  
7  
8  
9  
10  
11  
12  
13  
14  
15  
16  
17  
18  
19  
20  
21  
22  
23  
24  
25  
26  
27  
28  
29  
30  
31  
32  
33  
34  
35  
36  
37  
38  
39  
40  
41  
42  
43  
44  
45  
46  
47  
48  
49  
50  
51  
52  
53  
54  
55  
56  
57  
58  
59  
60

|                                                              |                    |                        |
|--------------------------------------------------------------|--------------------|------------------------|
| Chatham Centre                                               | October 14, 2005   | 1223; 4238             |
| Thunder Bay Regional Health Sciences Centre                  | March 27, 2006     | 3853; 4315             |
| Vaughan Imaging Consultants                                  | April 1, 2006      | N/A                    |
| Princess Margaret Hospital                                   | May 1, 2006        | 4406; 3910             |
| Lakeridge Health - Oshawa                                    | September 25, 2006 | 4171                   |
| Lakeridge Health - Bowmanville                               | September 25, 2006 | N/A                    |
| Grand River Hospital - Freeport                              | July 30, 2007      | 3734; 4107             |
| Wentworth-Halton X-Ray and Ultrasound - Burlington South     | February 1, 2008   | 1160; 4144             |
| Woodstock General Hospital                                   | May 1, 2008        | 1716; 4057             |
| Hawkesbury and District General Hospital                     | July 1, 2008       | 1777; 4268             |
| Credit Valley Hospital                                       | January 19, 2009   | 4747; 4751             |
| Sault Area Hospital                                          | April 1, 2009      | 3972; 4407             |
| Juravinski Hospital & Cancer Care Centre**                   | August 10, 2010    | N/A                    |
| Trenton Memorial Hospital                                    | September 7, 2010  | 4099                   |
| WRH Breast Health - Ouellette Campus (formerly Hotel Dieu)** | January 4, 2011    | 4773; 4774; 4142       |
| Markham Stouffville Hospital                                 | January 17, 2011   | 3587; 4235             |
| Uxbridge Cottage Hospital                                    | January 17, 2011   | N/A                    |
| Bluewater Health - Norman                                    | June 1, 2011       | 4109; 4415             |
| Peterborough Regional Health Centre                          | June 24, 2011      | 1768; 4073             |
| Sensenbrenner Hospital                                       | July 1, 2011       | N/A                    |
| Kirkland and District Hospital                               | July 1, 2011       |                        |
| Hôpital Notre-Dame Hospital                                  | July 1, 2011       | N/A                    |
| Weeneebayko General Hospital                                 | July 1, 2011       |                        |
| Women's College Hospital                                     | July 4, 2011       | 4631                   |
| Sunnybrook Health Sciences Centre                            | July 4, 2011       | 3936; 4205             |
| Scarborough Health Network - General                         | August 15, 2011    | 3975; 4152             |
| Scarborough Health Network - Centenary                       | November 1, 2011   | 3943; 4139             |
| Southlake Regional Health Centre                             | November 1, 2011   | 2038; 4001             |
| Ross Memorial Hospital                                       | November 1, 2011   | 1893; 4177             |
| Etobicoke General Hospital                                   | November 7, 2011   | 3929; 4245             |
| Brampton Civic Hospital                                      | November 7, 2011   | 4016; 4681; 4685       |
| Mount Sinai Hospital                                         | November 14, 2011  | 1423; 4110; 4804; 4805 |
| Merivale Medical Imaging                                     | April 1, 2012      | N/A                    |
| Hôpital Montfort                                             | April 1, 2012      | 1661; 4130; 4461       |
| North York General - Branson                                 | April 1, 2012      | 4234                   |
| Royal Victoria Regional Health Centre                        | October 29, 2012   | 1825; 3987             |
| Brantford General Hospital                                   | November 14, 2012  | 4675; 4679             |
| St. Joseph's Healthcare Hamilton - Charlton Campus           | November 15, 2012  | 2003; 4054; 4055       |
| OBSP Hamilton*                                               | April 1, 2013      | 4014; 4140             |
| Lakeridge Health - Ajax Pickering Hospital*                  | June 1, 2013       | 4104                   |
| North Bay Regional Health Centre*                            | April 1, 2014      | 4730; 4734             |
| South Bruce Grey Health Centre - Walkerton*                  | May 1, 2014        | 1330; 4233             |
| York Radiology Consultants***                                | May 1, 2014        | 1983; 4285             |

1  
2  
3  
4  
5  
6  
7  
8  
9  
10  
11  
12  
13  
14  
15  
16  
17  
18  
19  
20  
21  
22  
23  
24  
25  
26  
27  
28  
29  
30  
31  
32  
33  
34  
35  
36  
37  
38  
39  
40  
41  
42  
43  
44  
45  
46  
47  
48  
49  
50  
51  
52  
53  
54  
55  
56  
57  
58  
59  
60

|                                       |                  |            |
|---------------------------------------|------------------|------------|
| Georgetown Hospital*                  | July 1, 2014     | 3926; 4192 |
| Northumberland Hills Hospital*        | July 7, 2014     | 1681; 3970 |
| Juravinski Hospital                   | October 1, 2014  | 4039       |
| Mackenzie Health*                     | December 1, 2014 | 1515       |
| Oakville-Trafalgar Memorial Hospital* | February 1, 2015 | 4759       |
| Queensway Carleton Hospital*          | April 1, 2015    | 2046       |
| North York General - General*         | April 15, 2015   | N/A        |
| Dixie X-Ray Associates - Highpoint*   | April 15, 2015   | N/A        |
| Queensway Health Centre*              | April 18, 2015   | 4624       |
| Strathroy Middlesex General Hospital* | January 4, 2016  | 3860; 4237 |
| Erie Shores HealthCare - Leamington*  | August 2, 2016   | 4231; 4298 |

The following institutions were identified as an O-BAS from algorithm, but corresponding assessment center is Unknown:  
3984, 4048, 4085, 4180

\* Site became a paid assessment center during study period

\*\* Site closed during study period

\*\*\* Site became a paid assessment center during study period and was subsequently closed

Confidential

## Supplementary Table S2: Administrative codes for surgery

| Code                                        | Description                                                                                                                                                                                                                             |
|---------------------------------------------|-----------------------------------------------------------------------------------------------------------------------------------------------------------------------------------------------------------------------------------------|
| <b>Surgery (OHIP definition)</b>            |                                                                                                                                                                                                                                         |
| R111                                        | Integumentary system surgical procedures – operations of the breast – partial mastectomy or wedge resection for treatment of breast disease, with or without biopsy, e.g. carcinoma or extensive fibrocystic disease                    |
| R108                                        | Integumentary system surgical procedures – operations of the breast – mastectomy – female (with or without biopsy), simple                                                                                                              |
| R109                                        | Mastectomy, radical or modified radical (with or without biopsy)                                                                                                                                                                        |
| R107                                        | Integumentary system surgical procedures – operations of the breast, excision, tumor or tissue for diagnostic biopsy and/or treatment, e.g. carcinoma, fibroadenoma or fibrocystic disease (single or multiple – same breast)           |
| R117                                        | Integumentary system surgical procedures – operations of the breast – mastectomy, radical or modified radical (with or without biopsy)                                                                                                  |
| R148                                        | Integumentary system surgical procedures – operations of the breast – mastectomy – male – unilateral for treatment of pathological male breast disease (with or without biopsy), e.g. carcinoma – simple                                |
| R149                                        | Integumentary system surgical procedures – operations of the breast – mastectomy – male – unilateral for treatment of pathological male breast disease (with or without biopsy), e.g. carcinoma – subcutaneous with nipple preservation |
| <b>Surgery (CIHI definition)</b>            |                                                                                                                                                                                                                                         |
| 1YM87                                       | Excision partial, breast                                                                                                                                                                                                                |
| 1YM89                                       | Excision total, breast                                                                                                                                                                                                                  |
| 1YM91                                       | Excision(modified) radical, breast                                                                                                                                                                                                      |
| 1YM90                                       | Excision total with reconstruction, breast                                                                                                                                                                                              |
| 1YM88                                       | Excision partial with reconstruction, breast                                                                                                                                                                                            |
| 1YM92                                       | Excision radical with reconstruction, breast                                                                                                                                                                                            |
| 1YK87                                       | Excision partial, nipple                                                                                                                                                                                                                |
| 1YK90                                       | Excision total with reconstruction, nipple                                                                                                                                                                                              |
| 1YK89                                       | Excision total, nipple                                                                                                                                                                                                                  |
| 1YL89                                       | Excision total, lactiferous duct                                                                                                                                                                                                        |
| 1YL87                                       | Excision partial, lactiferous duct                                                                                                                                                                                                      |
| <b>Surgery (QBP definition, using CIHI)</b> |                                                                                                                                                                                                                                         |
| 1YM87                                       | Excision partial, breast                                                                                                                                                                                                                |
| 1YM91LAXXQ                                  | Excision radical, breast using combined sources of tissue [e.g. local flap and tissue expander] modified or NOS                                                                                                                         |
| 1YM87DA                                     | Excision partial, breast using endoscopic approach with simple apposition                                                                                                                                                               |
| 1YM87GB                                     | Excision partial, breast using endoscopic guide wire (or needle hook) excision technique with simple apposition of tissue                                                                                                               |
| 1YM87LA                                     | Excision partial, breast using open approach with simple apposition of tissue (e.g. suturing)                                                                                                                                           |
| 1YM87LAXXA                                  | Excision partial, breast using open approach and full thickness autograft to close defect                                                                                                                                               |
| 1YM87LAXXE                                  | Excision partial, breast using open approach and local flap (to close defect)                                                                                                                                                           |
| 1YM87UT                                     | Excision partial, breast using open guide wire (or needle hook) excision technique and simple apposition of tissue                                                                                                                      |
| 1YM89LA                                     | Excision total, breast without tissue repair                                                                                                                                                                                            |
| 1YM89LAXXA                                  | Excision total, breast with full thickness autograft                                                                                                                                                                                    |
| 1YM89LAXXE                                  | Excision total, breast using open approach and local flap                                                                                                                                                                               |
| 1YM91LA                                     | Excision (modified) radical, breast without tissue                                                                                                                                                                                      |
| 1YM91LAPM                                   | Excision radical, breast with implantation of breast prosthesis modified or NOS                                                                                                                                                         |

|    |            |                                                                                                                                        |
|----|------------|----------------------------------------------------------------------------------------------------------------------------------------|
| 1  |            |                                                                                                                                        |
| 2  |            |                                                                                                                                        |
| 3  |            |                                                                                                                                        |
| 4  | 1YM91LATP  | Excision (modified) radical, breast with implantation of tissue expander                                                               |
| 5  | 1YM91LAXXA | Excision radical (modified), breast using full thickness autograft                                                                     |
| 6  | 1YM91LAXXE | Excision (modified) radical, breast using local flap                                                                                   |
| 7  | 1YM91TR    | Excision extended radical, breast without tissue                                                                                       |
| 8  | 1YM91TRXXA | Excision extended radical, breast using full thickness autograft                                                                       |
| 9  | 1YM91TRXXE | Excision extended radical, breast using local flap                                                                                     |
| 10 | 1YM91WP    | Excision super radical, breast without tissue                                                                                          |
| 11 | 1YM91WPXXA | Excision radical, breast using autograft super [Wangensteen                                                                            |
| 12 | 1YM91WPXXE | Excision super radical, breast using local flap                                                                                        |
| 13 | 1YM88LAPM  | Excision partial with reconstruction, breast without tissue with implantation of prosthesis                                            |
| 14 | 1YM88LAPME | Excision partial with reconstruction, breast with local flap with implantation of prosthesis                                           |
| 15 | 1YM88LAPMF | Excision partial with reconstruction, breast using free flap with implantation of prosthesis                                           |
| 16 | 1YM88LAPMG | Excision partial with reconstruction, breast using distant pedicled flap with implantation of prosthesis                               |
| 17 | 1YM88LAPMK | Excision partial with reconstruction, breast using homograft with implantation of prosthesis                                           |
| 18 | 1YM88LAQF  | Excision partial with reconstruction, breast without tissue with implantation of prosthesis and expander                               |
| 19 | 1YM88LAQFE | Excision partial with reconstruction, breast with local flap with implantation of prosthesis and expander                              |
| 20 | 1YM88LAQFF | Excision partial with reconstruction, breast using free flap with implantation of prosthesis and expander                              |
| 21 | 1YM88LAQFG | Excision partial with reconstruction, breast using distant pedicled flap with implantation of prosthesis and ex                        |
| 22 | 1YM88LATP  | Excision partial with reconstruction, breast without tissue with implantation of tissue expander                                       |
| 23 | 1YM88LATPE | Excision partial with reconstruction, breast with local flap with tissue expander                                                      |
| 24 | 1YM88LATPF | Excision partial with reconstruction, breast using free flap with implantation of tissue expander                                      |
| 25 | 1YM88LATPG | Exc prt breast w tiss expand ped flap reconstr                                                                                         |
| 26 | 1YM88LATPK | Excision partial with reconstruction, breast using homograft with implantation of tissue expander                                      |
| 27 | 1YM88LAXXE | Excision partial with reconstruction, breast using local flap with no implanted device                                                 |
| 28 | 1YM88LAXXF | Excision partial with reconstruction, breast using free flap with no implanted device                                                  |
| 29 | 1YM88LAXXG | Excision partial with reconstruction, breast using distant pedicled flap with no implanted device                                      |
| 30 | 1YM90LAPM  | Excision total with reconstruction, breast simple mastectomy with no node dissection without tissue with implantation of breast prosth |
| 31 | 1YM90LAPME | Excision total with reconstruction, breast simple mastectomy with no node dissection using local flap with implantation of breast pros |
| 32 | 1YM90LAPMF | Excision total with reconstruction, breast simple mastectomy with no node dissection using free flap (2) with implantation of breast p |
| 33 | 1YM90LAPMG | Excision total with reconstruction, breast simple mastectomy with no node dissection using distant pedicled flap(1) with implantation  |
| 34 | 1YM90LAPMK | Excision total with reconstruction, breast using homograft with implantation of breast prosthesis                                      |
| 35 | 1YM90LAQF  | Excision total with reconstruction, breast simple mastectomy with no node dissection without tissue with implantation of prosthesis an |
| 36 | 1YM90LAQFE | Excision total with reconstruction, breast simple mastectomy with no node dissection using local flap with implantation of prosthesis  |
| 37 | 1YM90LAQFF | Excision total with reconstruction, breast simple mastectomy with no node dissection using free flap (2) with implantation of prosthes |
| 38 | 1YM90LAQFG | Excision total with reconstruction, breast simple mastectomy with no node dissection using distant pedicled flap(1) with implantation  |
| 39 | 1YM90LATP  | Excision total with reconstruction, breast simple mastectomy with no node dissection without tissue with implantation of tissue expand |
| 40 | 1YM90LATPE | Excision total with reconstruction, breast using local flap with implantation of tissue expander                                       |
| 41 | 1YM90LATPF | Excision total with reconstruction, breast simple mastectomy with no node dissection using free flap (2) with implantation of tissue e |
| 42 | 1YM90LATPG | Excision total with reconstruction, breast simple mastectomy with no node dissection using distant pedicled flap(1) with implantation  |
| 43 | 1YM90LATPK | Excision total with reconstruction, breast using homograft with implantation of tissue expander                                        |
| 44 | 1YM90LAXXE | Excision total with reconstruction, breast simple mastectomy with no node dissection using local flap with no implanted device         |
| 45 |            |                                                                                                                                        |
| 46 |            |                                                                                                                                        |
| 47 |            |                                                                                                                                        |
| 48 |            |                                                                                                                                        |
| 49 |            |                                                                                                                                        |
| 50 |            |                                                                                                                                        |
| 51 |            |                                                                                                                                        |
| 52 |            |                                                                                                                                        |
| 53 |            |                                                                                                                                        |
| 54 |            |                                                                                                                                        |
| 55 |            |                                                                                                                                        |
| 56 |            |                                                                                                                                        |
| 57 |            |                                                                                                                                        |
| 58 |            |                                                                                                                                        |
| 59 |            |                                                                                                                                        |
| 60 |            |                                                                                                                                        |

|    |            |                                                                                                                                       |
|----|------------|---------------------------------------------------------------------------------------------------------------------------------------|
| 1  | 1YM90LAXXF | Excision total with reconstruction, breast simple mastectomy with no node dissection using free flap (2) with no implanted device     |
| 2  | 1YM90LAXXG | Excision total with reconstruction, breast simple mastectomy with no node dissection using distant pedicled flap(1) with no implanted |
| 3  | 1YM90LAXXQ | Excision total with reconstruction, breast with no implanted device using combined sources of tissue (e.g. free                       |
| 4  | 1YM92LAPME | Excision (modified) radical with reconstruction, breast using local flap with implantation of breast prosthesis                       |
| 5  | 1YM92LAPMF | Excision (modified) radical with reconstruction, breast using free flap with implantation of breast prosthesis                        |
| 6  | 1YM92LAPMG | Excision (modified) radical with reconstruction, breast using distant pedicled flap with implantation of breast prosthesis            |
| 7  | 1YM92LAQFE | Excision (modified) radical with reconstruction, breast using local flap with implantation of prosthesis and expander                 |
| 8  | 1YM92LAQFG | Excision (modified) radical with reconstruction, breast using distant pedicled flap with implantation of prosthesis and expander      |
| 9  | 1YM92LATPE | Excision (modified) radical with reconstruction, breast using local flap with implantation of tissue expander                         |
| 10 | 1YM92LATPF | Excision (modified) radical with reconstruction, breast using free flap with implantation of tissue expander                          |
| 11 | 1YM92LATPG | Excision (modified) radical with reconstruction, breast using distant pedicled flap with implantation of tissue expander              |
| 12 | 1YM92LATPK | Excision radical with reconstruction, breast modified or NOS using homograft with implantation of tissue expander                     |
| 13 | 1YM92LAXXE | Excision (modified) radical with reconstruction, breast using local flap with no implanted device                                     |
| 14 | 1YM92LAXXF | Excision (modified) radical with reconstruction, breast using free flap with no implanted device                                      |
| 15 | 1YM92LAXXG | Excision (modified) radical with reconstruction, breast using distant pedicled flap with no implanted device                          |
| 16 | 1YM92LAXXQ | Excision radical with reconstruction, breast modified or NOS with no implanted device using combined sources of                       |
| 17 | 1YM92TRPME | Excision radical with reconstruction, breast extended [Urban] using local flap with implantation of breast prosthesis                 |
| 18 | 1YM92TRPMK | Excision radical with reconstruction, breast extended [Urban] using homograft with implantation of breast prosthesis                  |
| 19 | 1YM92TRTPE | Excision radical with reconstruction, breast extended [Urban] using local flap with implantation of tissue expander                   |
| 20 | 1YM92TRTPK | Excision radical with reconstruction, breast extended [Urban] using homograft with implantation of tissue expander                    |
| 21 | 1YM92TRXXE | Excision extended radical with reconstruction, breast using local flap with no implanted device                                       |
| 22 | 1YM92TRXXF | Excision extended radical with reconstruction, breast using free flap with no implanted device                                        |
| 23 | 1YM92TRXXQ | Exc rad w reconstr breast OA w ext rad excisn combo tis                                                                               |
| 24 | 1YM92WPPMK | Excision radical with reconstruction, breast super [Wangensteen] using homograft with implantation of breast prosthesis               |
| 25 | 1YM92WPTPK | Excision radical with reconstruction, breast super [Wangensteen] using homograft with implantation of tissue expander                 |
| 26 | 1YM92LAPMK | Excision radical with reconstruction, breast modified or NOS using homograft with implantation of breast prosthesis                   |
| 27 | 1YM92TRPMF | Excision radical with reconstruction, breast extended [Urban] using free flap with implantation of breast prosthesis                  |
| 28 | 1YM92TRPMG | Excision radical with reconstruction, breast extended [Urban] using distant pedicled flap with implantation of breast prosthesis      |
| 29 | 1YM92TRTPF | Excision radical with reconstruction, breast extended [Urban] using free flap with implantation of tissue expander                    |
| 30 | 1YM92TRTPG | Excision radical with reconstruction, breast extended [Urban] using distant pedicled flap with implantation of tissue expander        |
| 31 | 1YM92TRXXG | Excision radical with reconstruction, breast extended [Urban] using distant pedicled flap with no implanted device                    |
| 32 | 1YM92WPPME | Excision radical with reconstruction, breast super [Wangensteen] using local flap with implantation of breast prosthesis              |

|                                                                                                                                                                                                                                                                                                                                                                                                                                                                                                                                                       |                                                                                                                                                              |
|-------------------------------------------------------------------------------------------------------------------------------------------------------------------------------------------------------------------------------------------------------------------------------------------------------------------------------------------------------------------------------------------------------------------------------------------------------------------------------------------------------------------------------------------------------|--------------------------------------------------------------------------------------------------------------------------------------------------------------|
| 1YM92WPPMF                                                                                                                                                                                                                                                                                                                                                                                                                                                                                                                                            | Excision radical with reconstruction, breast super [Wangensteen] using free flap with implantation of breast prosthesis                                      |
| 1YM92WPPMG                                                                                                                                                                                                                                                                                                                                                                                                                                                                                                                                            | Excision radical with reconstruction, breast super [Wangensteen] using distant pedicled flap with implantation of breast prosthesis                          |
| 1YM92WPTPE                                                                                                                                                                                                                                                                                                                                                                                                                                                                                                                                            | Excision radical with reconstruction, breast super [Wangensteen] using local flap with implantation of tissue expander                                       |
| 1YM92WPTPF                                                                                                                                                                                                                                                                                                                                                                                                                                                                                                                                            | Excision radical with reconstruction, breast super [Wangensteen] using free flap with implantation of tissue expander                                        |
| 1YM92WPTPG                                                                                                                                                                                                                                                                                                                                                                                                                                                                                                                                            | Excision radical with reconstruction, breast super [Wangensteen] using distant pedicled flap with implantation of tissue expander                            |
| 1YM87UTXXA                                                                                                                                                                                                                                                                                                                                                                                                                                                                                                                                            | Excision partial, breast using open guide wire (or needle hook) excision technique with autograft (to close defect)                                          |
| 1YM87UTXXE                                                                                                                                                                                                                                                                                                                                                                                                                                                                                                                                            | Excision partial, breast using open guide wire (or needle hook) excision technique with local flap (to close defect)                                         |
| 1YM92WPXXF                                                                                                                                                                                                                                                                                                                                                                                                                                                                                                                                            | Excision radical with reconstruction, breast super [Wangensteen] using free flap with no implanted device                                                    |
| 1YM92WPXXG                                                                                                                                                                                                                                                                                                                                                                                                                                                                                                                                            | Excision radical with reconstruction, breast super [Wangensteen] using distant pedicled flap with no implanted device                                        |
| 1YM92WPXXQ                                                                                                                                                                                                                                                                                                                                                                                                                                                                                                                                            | Excision radical with reconstruction, breast super [Wagensteen] using combined sources of tissue (e.g. free and pedicled TRAM flap) with no implanted device |
| 1YK87LA                                                                                                                                                                                                                                                                                                                                                                                                                                                                                                                                               | Excision partial, nipple using open excisional approach                                                                                                      |
| 1YK87LAXXA                                                                                                                                                                                                                                                                                                                                                                                                                                                                                                                                            | Excision partial, nipple using open excisional approach and full thickness autograft                                                                         |
| 1YK87LAXXB                                                                                                                                                                                                                                                                                                                                                                                                                                                                                                                                            | Excision partial, nipple using open excisional approach and split thickness autograft                                                                        |
| 1YK87LAXXE                                                                                                                                                                                                                                                                                                                                                                                                                                                                                                                                            | Excision partial, nipple using open excisional approach and local flap [e.g. rotation, advancement, transposition, Z-plasty] for closure                     |
| 1YK89LA                                                                                                                                                                                                                                                                                                                                                                                                                                                                                                                                               | Excision total, nipple using open approach                                                                                                                   |
| 1YK89LAXXA                                                                                                                                                                                                                                                                                                                                                                                                                                                                                                                                            | Excision total, nipple using open approach and full thickness autograft                                                                                      |
| 1YK89LAXXE                                                                                                                                                                                                                                                                                                                                                                                                                                                                                                                                            | Excision total, nipple using open approach and local flap [e.g. rotation, advancement, transposition, Z-plasty]                                              |
| 1YK90LAXXA                                                                                                                                                                                                                                                                                                                                                                                                                                                                                                                                            | Excision total with reconstruction, nipple using open approach and full thickness autograft [e.g. contralateral nipple, labia, thigh, retroauricular tissue] |
| 1YK90LAXXE                                                                                                                                                                                                                                                                                                                                                                                                                                                                                                                                            | Excision total with reconstruction, nipple using open approach and local skin flap [e.g. propeller, star, quadripod skate]                                   |
| 1YK90LAXXQ                                                                                                                                                                                                                                                                                                                                                                                                                                                                                                                                            | Excision total with reconstruction, nipple using open approach and combined local flap [e.g. nipple] and autograft [e.g. areola]                             |
| 1YL87LA                                                                                                                                                                                                                                                                                                                                                                                                                                                                                                                                               | Excision partial, lactiferous duct using open approach                                                                                                       |
| 1YL89LA                                                                                                                                                                                                                                                                                                                                                                                                                                                                                                                                               | Excision total, lactiferous duct using open approach                                                                                                         |
| <p>Restricted to the following ICD-10 diagnostic codes: C00-C97, D050, D051, D057, D059, D24, D486, D0500, D0501, D0509, D0510, D0511, D0519, D0570, D0571, D0579, D0590, D0591, D0599, D038, D039, D048, D049, D097, D099, D197, D199, D367, D369, D487, D489.</p> <p>OHIP – Ontario Health Insurance Plan database; CIHI – Canadian Institute of Health Information, which includes data from hospital-based procedures (inpatient and outpatient); QBP – quality-based procedures (a definition of surgery established at Cancer Care Ontario)</p> |                                                                                                                                                              |



## Supplementary Table S3: Administrative codes for healthcare

### utilization

| Code                            | Source | Description                                                                                                                                                         |
|---------------------------------|--------|---------------------------------------------------------------------------------------------------------------------------------------------------------------------|
| <b>Diagnostic mammogram</b>     |        |                                                                                                                                                                     |
| X184                            | OHIP   | Unilateral Mammogram - for individuals with signs or symptoms or follow-up of established disease                                                                   |
| X185                            | OHIP   | Bilateral Mammogram - for individuals with signs or symptoms or follow-up of established disease                                                                    |
| X194                            | OHIP   | Additional coned views with or without magnification (limit of two per breast) per film                                                                             |
| <b>Screening mammogram</b>      |        |                                                                                                                                                                     |
| X172                            | OHIP   | Unilateral Mammogram - for individuals with identified risk factors in accordance with clinical practice guidelines                                                 |
| X178                            | OHIP   | Bilateral Mammogram - for individuals with identified risk factors in accordance with clinical practice guidelines                                                  |
| <b>Breast biopsy</b>            |        |                                                                                                                                                                     |
| J149                            | OHIP   | Ultrasonic guidance of biopsy, aspiration, amniocentesis or drainage procedures (one physician only)                                                                |
| X121                            | OHIP   | Stereotactic core breast biopsy                                                                                                                                     |
| Z141                            | OHIP   | Needle Biopsy - one or more                                                                                                                                         |
| Z143                            | OHIP   | Needle Biopsy - large core breast biopsy - (14 gauge or larger bore needle)                                                                                         |
| 2YK71                           | CIHI   | Biopsy, nipple using percutaneous approach (needle, punch) or open [incisional] approach                                                                            |
| 2YM71                           | CIHI   | Biopsy, breast using percutaneous (needle) aspiration, device NEC or ore needle aspiration technique                                                                |
| 2SZ71                           | CIHI   | Biopsy, soft tissue of the chest and abdomen using percutaneous (needle) approach or open [incisional] approach                                                     |
| <b>Lymph node biopsy</b>        |        |                                                                                                                                                                     |
| R914                            | OHIP   | Axillary or inguinal lymph nodes - limited resection, unilateral                                                                                                    |
| Z405                            | OHIP   | Biopsy, Anterior cervical lymph node(s), unilateral                                                                                                                 |
| Z406                            | OHIP   | Biopsy, Scalene, posterior cervical lymph node(s), unilateral                                                                                                       |
| Z407                            | OHIP   | Percutaneous retroperitoneal, one group                                                                                                                             |
| Z408                            | OHIP   | Bone marrow core biopsy (with biopsy needle)                                                                                                                        |
| Z409                            | OHIP   | Percutaneous retroperitoneal, two group                                                                                                                             |
| Z411                            | OHIP   | Biopsy, Axillary or inguinal lymph node(s), unilateral                                                                                                              |
| <b>Sentinel node biopsy</b>     |        |                                                                                                                                                                     |
| Z427                            | OHIP   | Sentinel node biopsy, per draining basin                                                                                                                            |
| 2MD71                           | CIHI   | Biopsy, lymph node(s), axillary using percutaneous (needle) approach or open approach                                                                               |
| <b>Consultations and visits</b> |        |                                                                                                                                                                     |
| Internal medicine consult       | OHIP   | A135, A130, A435, A136, A133, A134, A138, C135, C130, C435, C136, C133, C134, C131, W235, W130, W435, W236                                                          |
| Dermatology consult             | OHIP   | A025, A027, A026, A023, A024, A020, C025, C026, C023, C024, C020, W025, W026                                                                                        |
| Cardiology consult              | OHIP   | A605, A600, A675, A606, A603, A604, A601, A608, A605, A600, A675, A606, A603, A604, A601, A608, C605, C600, C675, C606, C603, C604, C601<br>HSP specialty code = 60 |
| General practitioner visit      | OHIP   | A005, A911, A912, A945, A905, A006, A003, A004, A888, A091, A900, A933, A100, A937, A967                                                                            |
| Cardiac surgery consult         | OHIP   | A095, A935, A096, A093, A094, C095, C935, C096, C093, C094, W095, W096<br>HSP specialty code = 09                                                                   |
| Medical oncology consult        | OHIP   | A445, A845, A446, A443, A444, A441, A448, C445, C845, C446, C443, C444, C441, W445, W765, W845, W44                                                                 |

|   |                                             |      |                                                                                                                              |
|---|---------------------------------------------|------|------------------------------------------------------------------------------------------------------------------------------|
| 1 |                                             |      |                                                                                                                              |
| 2 |                                             |      |                                                                                                                              |
| 3 | Radiation oncology consult                  | OHIP | A345, A765, A745, A346, A343, A340, A341, A348, C345, C765, C745, C346, C343, C344, C341                                     |
| 4 |                                             |      |                                                                                                                              |
| 5 | General or general thoracic surgery consult | OHIP | A645, A935, A646, A643, A644, C645, C935, C646, C643, C644, A035, A036, A033, A034, C035, C935, C036, C033, C034, W035, W036 |
| 6 |                                             |      | HSP specialty code = 03 (general surgery) or 64 (general thoracic surgery)                                                   |
| 7 |                                             |      |                                                                                                                              |
| 8 | Diagnostic radiology assessment             | OHIP | A335, A365, A330, A332, A331, A338, C335, C365, C330, C332                                                                   |
| 9 |                                             |      |                                                                                                                              |

### Breast ultrasound

|    |       |      |                                                  |
|----|-------|------|--------------------------------------------------|
| 11 |       |      |                                                  |
| 12 | J127  | OHIP | Diagnostic Ultrasound - scan B-mode (per breast) |
| 13 | 3YM30 | OHIP | Ultrasound, breast                               |

### Abdominal/thoracic ultrasound

|    |       |      |                                                                                       |
|----|-------|------|---------------------------------------------------------------------------------------|
| 14 |       |      |                                                                                       |
| 15 |       |      |                                                                                       |
| 16 | J128  | OHIP | Abdominal scan - limited study (e.g. gallbladder only, aorta only or follow-up study) |
| 17 | J135  | OHIP | Abdominal scan - complete                                                             |
| 18 | 3OT30 | CIHI | Ultrasound, abdominal cavity                                                          |
| 19 | 3GY30 | CIHI | Ultrasound, thoracic cavity                                                           |

### Abdominal/thoracic computed tomography (CT) scan

|    |       |      |                                                |
|----|-------|------|------------------------------------------------|
| 20 |       |      |                                                |
| 21 |       |      |                                                |
| 22 | X406  | OHIP | Thorax -without IV contrast                    |
| 23 | X407  | OHIP | Thorax -with IV contrast                       |
| 24 | X125  | OHIP | Thorax -with and without IV contrast           |
| 25 | X409  | OHIP | Abdomen -without IV contrast                   |
| 26 | X410  | OHIP | Abdomen -without IV contrast                   |
| 27 | X126  | OHIP | Abdomen -without IV contrast                   |
| 28 | 3OT20 | CIHI | Computerized tomography [CT], abdominal cavity |
| 29 | 3YM20 | CIHI | Computerized tomography [CT], breast           |
| 30 | 3GY20 | CIHI | Computerized tomography [CT], thoracic cavity  |

### Abdominal/thoracic magnetic resonance imaging (MRI) scan

|    |       |      |                                                                                                                             |
|----|-------|------|-----------------------------------------------------------------------------------------------------------------------------|
| 31 |       |      |                                                                                                                             |
| 32 |       |      |                                                                                                                             |
| 33 | X446  | OHIP | Breast - unilateral or bilateral, multislice sequence                                                                       |
| 34 | X447  | OHIP | Breast - unilateral or bilateral, repeat (another plane, different pulse sequence - to a maximum of 3 repeats).             |
| 35 | X441  | OHIP | Thorax - multislice sequence                                                                                                |
| 36 | X445  | OHIP | Thorax - repeat (another plane, different pulse sequence - to a maximum of 3 repeats).                                      |
| 37 | X451  | OHIP | Abdomen - multislice sequence                                                                                               |
| 38 | X455  | OHIP | Abdomen - repeat (another plane, different pulse sequence - to a maximum of 3 repeats).                                     |
| 39 | X499  | OHIP | Three Dimensional MRI acquisition sequence, including post-processing (minimum of 60 slices; maximum 1 per patient per day) |
| 40 | 3OT40 | CIHI | Magnetic resonance imaging [MRI], abdominal cavity                                                                          |
| 41 | 3YM40 | CIHI | Magnetic resonance imaging [MRI], breast                                                                                    |
| 42 | 3GY40 | CIHI | Magnetic resonance imaging [MRI], thoracic cavity                                                                           |

### Chest x-ray

|    |       |      |                             |
|----|-------|------|-----------------------------|
| 43 |       |      |                             |
| 44 |       |      |                             |
| 45 | X090  | OHIP | Chest - single view         |
| 46 | X091  | OHIP | Chest - two views           |
| 47 | X092  | OHIP | Chest - three or more views |
| 48 | 3GY10 | CIHI | Xray, thoracic cavity       |

### Other (ductogram, capsulotomy, capsulectomy)

|    |       |      |                                                                   |
|----|-------|------|-------------------------------------------------------------------|
| 49 |       |      |                                                                   |
| 50 |       |      |                                                                   |
| 51 | X192  | OHIP | Mammary ductography                                               |
| 52 | J037  | OHIP | Mammary ductography                                               |
| 53 | 3YL10 | CIHI | Xray, lactiferous duct                                            |
| 54 | Z182  | OHIP | Breast capsulectomy                                               |
| 55 | Z135  | OHIP | Open capsulotomy with or without replacement of breast prosthesis |
| 56 |       |      |                                                                   |
| 57 |       |      |                                                                   |
| 58 |       |      |                                                                   |

1  
2  
3 1YM72 CIHI Release, breast

4 OHIP – Ontario Health Insurance Plan database; CIHI – Canadian Institute of Health Information, which includes data from hospital-  
5 based procedures (inpatient and outpatient)  
6  
7  
8  
9  
10  
11  
12  
13  
14  
15  
16  
17  
18  
19  
20  
21  
22  
23  
24  
25  
26  
27  
28  
29  
30  
31  
32  
33  
34  
35  
36  
37  
38  
39  
40  
41  
42  
43  
44  
45  
46  
47  
48  
49  
50  
51  
52  
53  
54  
55  
56  
57  
58

Confidential

## Supplementary Table S4: Healthcare encounters on the suspicion date

| Index Contact Encounter Category                                 | N=47,840 | %   |
|------------------------------------------------------------------|----------|-----|
| OBSP abnormal breast screening                                   | 11,821   | 25% |
| Screening mammography                                            | 3,004    | 6%  |
| Breast cancer                                                    | 3,154    | 7%  |
| Other related cancers                                            | 371      | 1%  |
| Benign neoplasm/CIS                                              | 2,445    | 5%  |
| Breast cyst, cystic disease, abscess, hypertrophy, other         | 6,423    | 13% |
| Lymph system–related conditions                                  | 76       | 0%  |
| Diagnostic mammography and related procedures, with referral     | 11,534   | 24% |
| Diagnostic mammography and related procedures, no referral       | 742      | 2%  |
| Breast ultrasound, with referral                                 | 4,248    | 9%  |
| Breast ultrasound, no referral                                   | 190      | <1% |
| Other ultrasound, with referral                                  | 1,074    | 2%  |
| Other ultrasound, no referral                                    | 42       | <1% |
| Surgical consult with no procedure, with referral                | 1,518    | 3%  |
| Surgical consult with no procedure, no referral                  | 25       | <1% |
| Cyst aspiration or drainage, with referral                       | 62       | <1% |
| Cyst aspiration or drainage, no referral                         | 6        | <1% |
| Breast biopsy with or without ultrasound guidance, with referral | 576      | 1%  |
| Breast biopsy with or without ultrasound guidance, no referral   | 24       | <1% |
| Mastectomy, with referral                                        | <6       | <1% |
| Mastectomy, no referral                                          | <6       | <1% |
| Breast MRI, with referral                                        | 128      | <1% |
| Breast MRI, no referral                                          | <6       | <1% |
| Other MRI, with referral                                         | 194      | <1% |
| Other MRI, no referral                                           | 24       | <1% |
| Nuclear medicine, with referral                                  | 154      | <1% |
| Nuclear medicine, no referral                                    | <6       | <1% |

Healthcare encounters on the suspicion date. If more than one encounter was present on this date, a previously established hierarchy was used as per Groome et al (2019):

Groome PA, Webber C, Whitehead M, et al. Determining the Cancer Diagnostic Interval Using Administrative Health Care Data in a Breast Cancer Cohort. *JCO Clin cancer informatics*. 2019;3:1-10.

doi:10.1200/CCI.18.00131

OBSP – Ontario Breast Screening Program; CIS – Carcinoma *in situ*; MRI – magnetic resonance imaging

## Supplementary Table S5: Subintervals

| Time interval                              | Description                                                                                                                                      | Statistic            | Non-O-BAS<br>(n=8,862) | O-BAS<br>(n=42,598) | Total<br>(n=51,460) |
|--------------------------------------------|--------------------------------------------------------------------------------------------------------------------------------------------------|----------------------|------------------------|---------------------|---------------------|
| Pre-treatment interval                     | Time from diagnosis to first treatment                                                                                                           | N (%)                | 7,386 (83%)            | 39,614 (93%)        | 50,232 (98%)        |
|                                            |                                                                                                                                                  | Median (IQR), days   | 34 (21, 49)            | 34 (23, 47)         | 34 (23, 47)         |
|                                            |                                                                                                                                                  | 90% percentile, days | 72                     | 63                  | 63                  |
| Total interval                             | Time from index contact to initial treatment<br>(diagnosis or first treatment)                                                                   | N (%)                | 7,788 (88%)            | 40,052 (94%)        | 47,840 (93%)        |
|                                            |                                                                                                                                                  | Median (IQR), days   | 39 (20, 92)            | 35 (18, 79)         | 35 (19, 82)         |
|                                            |                                                                                                                                                  | 90% percentile, days | 174                    | 162                 | 165                 |
| Breast imaging interval                    | Time from referring physician visit to first breast<br>imaging (diagnostic mammogram, breast<br>ultrasound or breast magnetic resonance imaging) | N (%)                | 6,982 (79%)            | 38,991 (92%)        | 45,973 (89%)        |
|                                            |                                                                                                                                                  | Median (IQR), days   | 7 (3, 14)              | 7 (3, 14)           | 7 (3, 14)           |
|                                            |                                                                                                                                                  | 90% percentile, days | 31                     | 29                  | 29                  |
| Surgical consult interval                  | Time from referring physician visit to first surgical<br>consult (biopsy, cyst aspiration, mastectomy)                                           | N (%)                | 6,670 (75%)            | 37,453 (88%)        | 44,123 (86%)        |
|                                            |                                                                                                                                                  | Median (IQR), days   | 6 (3, 12)              | 6 (3, 10)           | 6 (3, 10)           |
|                                            |                                                                                                                                                  | 90% percentile, days | 21                     | 18                  | 19                  |
| Biopsy interval                            | Time from referring physician/biopsying physician<br>to first biopsy between index contact and<br>diagnosis date                                 | N (%)                | 6,492 (73%)            | 37,948 (89%)        | 44,440 (86%)        |
|                                            |                                                                                                                                                  | Median (IQR), days   | 2 (2, 5)               | 2 (2, 4)            | 2 (2, 4)            |
|                                            |                                                                                                                                                  | 90% percentile, days | 7                      | 6                   | 6                   |
| First assessment interval                  | Time from index contact to first diagnostic<br>test/consult                                                                                      | N (%)                | 7,250 (82%)            | 38,934 (91%)        | 46,184 (90%)        |
|                                            |                                                                                                                                                  | Median (IQR), days   | 11 (4, 31)             | 13 (6, 29)          | 13 (5, 29)          |
|                                            |                                                                                                                                                  | 90% percentile, days | 89                     | 80                  | 82                  |
| First Assessment to<br>Diagnostic Interval | Time from first diagnostic test to diagnosis date                                                                                                | N (%)                | 7,250 (82%)            | 38,934 (91%)        | 46,184 (90%)        |
|                                            |                                                                                                                                                  | Median (IQR), days   | 20 (10, 42)            | 17 (8, 36)          | 17 (8, 36)          |
|                                            |                                                                                                                                                  | 90% percentile, days | 113                    | 100                 | 102                 |
| Diagnostic interval                        | Time from index contact to diagnosis date                                                                                                        | N (%)                | 7,788 (88%)            | 40,052 (94%)        | 47,840 (93%)        |
|                                            |                                                                                                                                                  | Median (IQR), days   | 39 (20, 92)            | 35 (18, 79)         | 35 (19, 82)         |
|                                            |                                                                                                                                                  | 90% percentile, days | 174                    | 162                 | 165                 |

O-BAS – OBSP-affiliated breast assessment site; OBSP – Ontario Breast Screening Program; IQR – (25<sup>th</sup>, 75<sup>th</sup> percentile)
